# Supplementary material for: Evaluation of bismuth-based dispersion energy donors – synthesis, structure and theoretical study of 2-biphenylbismuth(iii) derivatives
Source: Royal Society of Chemistry journal article supplement (doi:10.1039/c9cp06924k), 2020-01-01
Supplement: c9cp06924k1.pdf [file c9cp06924k1.pdf]

## Supplementary Information for

# Evaluation of bismuth-based dispersion energy donors – synthesis, structure and theoretical study of 2-biphenylbismuth(III) derivatives

Ana-Maria Fritzsche,<sup>a,f</sup> Sebastian Scholz,<sup>a</sup> Małgorzata Krasowska,<sup>b</sup> Kalishankar Bhattacharyya,<sup>b</sup> Ana Maria Toma,<sup>a,c</sup> Cristian Silvestru,<sup>c</sup> Marcus Korb,<sup>d,e</sup> Tobias Rüffer,<sup>d</sup> Heinrich Lang,<sup>d,f</sup> Alexander A. Auer,<sup>\*b</sup> Michael Mehring<sup>\*a,f</sup>

<sup>a</sup>Technische Universität Chemnitz, Fakultät für Naturwissenschaften, Institut für Chemie, Professur Koordinationschemie, 09107 Chemnitz, Germany

<sup>b</sup>Max-Planck-Institut für Kohlenforschung, Kaiser-Wilhelm-Platz 1, 45470 Mülheim an der Ruhr, Germany

<sup>c</sup>Babeş-Bolyai University, Faculty of Chemistry and Chemical Engineering, Department of Chemistry, Supramolecular Organic and Organometallic Chemistry Centre (SOOMCC), 11 Arany Janos, 400028 Cluj-Napoca, Romania

<sup>d</sup>Technische Universität Chemnitz, Fakultät für Naturwissenschaften, Institut für Chemie, Professur Anorganische Chemie, 09107 Chemnitz, Germany

<sup>e</sup>The University of Western Australia, Faculty of Science, School of Molecular Sciences, Crawley, Perth, WA 6009, Australia

<sup>f</sup>Center for Materials, Architectures and Integration of Nanomembranes (MAIN), Rosenbergstr. 6, 09126 Chemnitz

Email: Michael Mehring\* - [michael.mehring@chemie.tu-chemnitz.de](mailto:michael.mehring@chemie.tu-chemnitz.de)

Email: Alexander Auer\* - [alexander.auer@kofo.mpg.de](mailto:alexander.auer@kofo.mpg.de)

\* Corresponding authors

## Table of contents:

|                                                                                                                                                              |    |
|--------------------------------------------------------------------------------------------------------------------------------------------------------------|----|
| <b>Table S1</b> Crystallographic data and structure refinement details for <b>1–6</b> .....                                                                  | 3  |
| <b>Table S2</b> Crystallographic data and structure refinement details for <b>7–9</b> .....                                                                  | 4  |
| <b>Figure S1</b> Time dependent <sup>1</sup> H NMR spectra of the stability of (2-PhC <sub>6</sub> H <sub>4</sub> ) <sub>2</sub> BiCl ( <b>2</b> ) .....     | 5  |
| <b>Figure S2</b> Time dependent <sup>1</sup> H NMR spectra of the stability of (2-PhC <sub>6</sub> H <sub>4</sub> )BiBr <sub>2</sub> ( <b>7</b> ) .....      | 5  |
| <b>Figure S3</b> Molecular structure of (2-PhC <sub>6</sub> H <sub>4</sub> ) <sub>3</sub> Sb ( <b>9</b> ) and description of the solid state structure ..... | 6  |
| <b>Figure S4</b> Molecular structure of (2-PhC <sub>6</sub> H <sub>4</sub> ) <sub>3</sub> Bi ( <b>1</b> ) .....                                              | 8  |
| <b>Figure S5</b> Molecular structure of (2-PhC <sub>6</sub> H <sub>4</sub> ) <sub>2</sub> BiCl ( <b>2</b> ) .....                                            | 9  |
| <b>Figure S6</b> Molecular structure of (2-PhC <sub>6</sub> H <sub>4</sub> ) <sub>2</sub> BiI ( <b>4</b> ) .....                                             | 9  |
| <b>Figure S7</b> Molecular structure of (2-PhC <sub>6</sub> H <sub>4</sub> ) <sub>2</sub> BiMe ( <b>5</b> ) .....                                            | 10 |
| <b>Figure S8</b> Molecular structure of (2-PhC <sub>6</sub> H <sub>4</sub> )BiCl <sub>2</sub> ( <b>6</b> ) .....                                             | 10 |
| <b>Figure S9</b> Molecular structure of (2-PhC <sub>6</sub> H <sub>4</sub> )BiBr <sub>2</sub> ( <b>7</b> ) .....                                             | 11 |
| <b>Figure S10</b> Molecular structure of (2-PhC <sub>6</sub> H <sub>4</sub> )BiI <sub>2</sub> ( <b>8</b> ) .....                                             | 11 |
| <b>Figure S11</b> <sup>13</sup> C NMR spectra (aromatic region) in CDCl <sub>3</sub> of compounds <b>1–5</b> and <b>9</b> .....                              | 12 |
| <b>Figure S12</b> <sup>13</sup> C NMR spectra (aromatic region) in CDCl <sub>3</sub> of compounds <b>6–8</b> .....                                           | 12 |
| <b>Figure S13</b> Temperature dependent <sup>1</sup> H NMR spectra of (2-PhC <sub>6</sub> H <sub>4</sub> ) <sub>2</sub> BiI ( <b>4</b> ) .....               | 13 |
| <b>Figure S14</b> <sup>1</sup> H– <sup>1</sup> H COSY NMR spectrum of (2-PhC <sub>6</sub> H <sub>4</sub> ) <sub>3</sub> Bi ( <b>1</b> ) .....                | 13 |
| <b>Figure S15</b> <sup>1</sup> H– <sup>1</sup> H COSY NMR spectrum of (2-PhC <sub>6</sub> H <sub>4</sub> ) <sub>2</sub> BiCl ( <b>2</b> ) .....              | 14 |
| <b>Figure S16</b> <sup>1</sup> H– <sup>1</sup> H COSY NMR spectrum of (2-PhC <sub>6</sub> H <sub>4</sub> ) <sub>2</sub> BiBr ( <b>3</b> ) .....              | 14 |
| <b>Figure S17</b> <sup>1</sup> H– <sup>1</sup> H COSY NMR spectrum of (2-PhC <sub>6</sub> H <sub>4</sub> ) <sub>2</sub> BiI ( <b>4</b> ) .....               | 15 |
| <b>Figure S18</b> <sup>1</sup> H– <sup>1</sup> H COSY NMR spectrum of (2-PhC <sub>6</sub> H <sub>4</sub> ) <sub>2</sub> BiMe ( <b>5</b> ) .....              | 15 |
| <b>Figure S19</b> <sup>1</sup> H– <sup>1</sup> H COSY NMR spectrum of (2-PhC <sub>6</sub> H <sub>4</sub> )BiCl <sub>2</sub> ( <b>6</b> ) .....               | 16 |
| <b>Figure S20</b> <sup>1</sup> H– <sup>1</sup> H COSY NMR spectrum of (2-PhC <sub>6</sub> H <sub>4</sub> )BiBr <sub>2</sub> ( <b>7</b> ) .....               | 16 |
| <b>Figure S21</b> <sup>1</sup> H– <sup>1</sup> H COSY NMR spectrum of (2-PhC <sub>6</sub> H <sub>4</sub> )BiI <sub>2</sub> ( <b>8</b> ) .....                | 17 |
| <b>Figure S22</b> <sup>1</sup> H– <sup>1</sup> H COSY NMR spectrum of (2-PhC <sub>6</sub> H <sub>4</sub> ) <sub>3</sub> Sb ( <b>9</b> ) .....                | 17 |
| <b>Figure S23</b> Powder X-ray diffraction pattern of (2-PhC <sub>6</sub> H <sub>4</sub> ) <sub>3</sub> Bi ( <b>1</b> ) .....                                | 18 |
| <b>Figure S24</b> Powder X-ray diffraction pattern of (2-PhC <sub>6</sub> H <sub>4</sub> ) <sub>2</sub> BiCl ( <b>2</b> ) .....                              | 18 |
| <b>Figure S25</b> Powder X-ray diffraction pattern of (2-PhC <sub>6</sub> H <sub>4</sub> ) <sub>2</sub> BiBr ( <b>3</b> ) .....                              | 19 |
| <b>Figure S26</b> Powder X-ray diffraction pattern of (2-PhC <sub>6</sub> H <sub>4</sub> ) <sub>2</sub> BiI ( <b>4</b> ) .....                               | 19 |
| <b>Figure S27</b> Powder X-ray diffraction pattern of (2-PhC <sub>6</sub> H <sub>4</sub> ) <sub>2</sub> BiMe ( <b>5</b> ) .....                              | 20 |
| <b>Figure S28</b> Powder X-ray diffraction pattern of (2-PhC <sub>6</sub> H <sub>4</sub> )BiCl <sub>2</sub> ( <b>6</b> ) .....                               | 20 |
| <b>Figure S29</b> Powder X-ray diffraction pattern of (2-PhC <sub>6</sub> H <sub>4</sub> )BiBr <sub>2</sub> ( <b>7</b> ) .....                               | 21 |
| <b>Figure S30</b> Powder X-ray diffraction pattern of (2-PhC <sub>6</sub> H <sub>4</sub> )BiI <sub>2</sub> ( <b>8</b> ) .....                                | 21 |
| <b>Figure S31</b> Powder X-ray diffraction pattern of (2-PhC <sub>6</sub> H <sub>4</sub> ) <sub>3</sub> Sb ( <b>9</b> ) .....                                | 22 |
| <b>Figure S32</b> Definition of dihedral angles as displayed in Fig. 17 and 18 .....                                                                         | 23 |
| Coordinates of the optimized geometries during computational calculation.....                                                                                | 24 |
| 1. Selected geometries from potential energy surface of <b>3</b> along the C–C–Bi–X and C–C–C–C dihedral scan. All coordinates are in Å units.               |    |
| 2. Lowest energy conformations of <b>3</b> from GFN2-XTB simulation.                                                                                         |    |
| 3. Selected geometries from potential energy surfaces of R <sub>2</sub> BiBr ( <b>3</b> ).                                                                   |    |
| 4. Transition state geometries of R <sub>2</sub> BiBr ( <b>3</b> ).                                                                                          |    |
| <b>References</b> .....                                                                                                                                      | 96 |

**Table S1** Crystallographic data and structure refinement details for (2-PhC<sub>6</sub>H<sub>4</sub>)<sub>3</sub>Bi (**1**), (2-PhC<sub>6</sub>H<sub>4</sub>)<sub>2</sub>BiCl (**2**), (2-PhC<sub>6</sub>H<sub>4</sub>)<sub>2</sub>BiBr (**3**), (2-PhC<sub>6</sub>H<sub>4</sub>)<sub>2</sub>BiI (**4**), (2-PhC<sub>6</sub>H<sub>4</sub>)<sub>2</sub>BiMe (**5**) and Bi(2-PhC<sub>6</sub>H<sub>4</sub>)BiCl<sub>2</sub> (**6**).

|                                                                                  | <b>1</b>                           | <b>2</b>                             | <b>3</b>                             | <b>4</b>                            | <b>5</b>                           | <b>6</b>                                         |
|----------------------------------------------------------------------------------|------------------------------------|--------------------------------------|--------------------------------------|-------------------------------------|------------------------------------|--------------------------------------------------|
| Empirical formula                                                                | C <sub>36</sub> H <sub>27</sub> Bi | C <sub>24</sub> H <sub>18</sub> BiCl | C <sub>24</sub> H <sub>18</sub> BiBr | C <sub>24</sub> H <sub>18</sub> BiI | C <sub>25</sub> H <sub>21</sub> Bi | C <sub>12</sub> H <sub>9</sub> BiCl <sub>2</sub> |
| <i>M</i> (g mol <sup>-1</sup> )                                                  | 668.55                             | 550.81                               | 595.27                               | 642.26                              | 530.40                             | 433.07                                           |
| Temperature (K)                                                                  | 120                                | 100                                  | 116                                  | 100                                 | 100                                | 100                                              |
| $\lambda$ (Å)                                                                    | 1.54184                            | 1.54178                              | 0.71073                              | 0.71073                             | 1.54178                            | 0.71073                                          |
| Crystal system                                                                   | monoclinic                         | triclinic                            | monoclinic                           | triclinic                           | monoclinic                         | orthorhombic                                     |
| Space group                                                                      | <i>P</i> 2 <sub>1</sub> / <i>n</i> | <i>P</i> $\bar{1}$                   | <i>P</i> 2 <sub>1</sub> / <i>n</i>   | <i>P</i> $\bar{1}$                  | <i>P</i> 2 <sub>1</sub>            | <i>P</i> 2 <sub>1</sub> 2 <sub>1</sub>           |
| <i>a</i> (Å)                                                                     | 10.0767(1)                         | 9.9371(3)                            | 9.9115(7)                            | 9.3194(9)                           | 15.1772(5)                         | 7.6237(7)                                        |
| <i>b</i> (Å)                                                                     | 20.4313(1)                         | 11.3295(4)                           | 15.7922(9)                           | 9.6034(9)                           | 6.7889(3)                          | 9.0462(8)                                        |
| <i>c</i> (Å)                                                                     | 13.8429(1)                         | 17.9137(6)                           | 13.3369(8)                           | 12.8339(12)                         | 19.2090(7)                         | 17.6540(17)                                      |
| $\alpha$ (deg)                                                                   | 90                                 | 78.588(1)                            | 90                                   | 108.743(3)                          | 90                                 | 90                                               |
| $\beta$ (deg)                                                                    | 109.817(1)                         | 86.690(1)                            | 107.717(7)                           | 99.713(3)                           | 99.773(3)                          | 90                                               |
| $\gamma$ (deg)                                                                   | 90                                 | 78.695(1)                            | 90                                   | 103.712(3)                          | 90                                 | 90                                               |
| <i>V</i> (Å <sup>3</sup> )                                                       | 2681.20(4)                         | 1938.16(11)                          | 1988.5(2)                            | 1018.57(17)                         | 1950.51(13)                        | 1217.52(19)                                      |
| <i>Z</i>                                                                         | 4                                  | 4                                    | 4                                    | 2                                   | 4                                  | 4                                                |
| <i>D</i> <sub>calc</sub> (g cm <sup>-3</sup> )                                   | 1.656                              | 1.888                                | 1.988                                | 2.097                               | 1.806                              | 2.363                                            |
| $\mu$ (mm <sup>-1</sup> )                                                        | 13.062                             | 19.133                               | 10.880                               | 10.174                              | 17.710                             | 14.883                                           |
| <i>F</i> (000)                                                                   | 1304                               | 1048                                 | 1120                                 | 598                                 | 1016                               | 792                                              |
| Crystal size (mm)                                                                | 0.2 x 0.2 x 0.1                    | 0.27 x 0.12 x 0.12                   | 0.4 x 0.4 x 0.4                      | 0.42 x 0.35 x 0.31                  | 0.45 x 0.09 x 0.06                 | 0.1 x 0.1 x 0.1                                  |
| Reflections collected                                                            | 23124                              | 26560                                | 8769                                 | 15873                               | 28460                              | 5829                                             |
| Independent reflections                                                          | 4819                               | 6656                                 | 3653                                 | 3558                                | 6360                               | 2249                                             |
| <i>R</i> <sub>int</sub>                                                          | 0.0384                             | 0.0351                               | 0.0318                               | 0.0443                              | 0.0566                             | 0.0385                                           |
| Number of data / restraints / parameters                                         | 4819 / 0 / 334                     | 6656 / 0 / 470                       | 3653 / 0 / 235                       | 3558 / 0 / 235                      | 6360 / 37 / 469                    | 2249 / 111 / 138                                 |
| Goodness-of-fit on <i>F</i> <sup>2</sup>                                         | 1.082                              | 1.090                                | 1.041                                | 1.087                               | 1.102                              | 0.801                                            |
| Final <i>R</i> indices [ <i>I</i> > 2 $\sigma$ ( <i>I</i> )]                     |                                    |                                      |                                      |                                     |                                    |                                                  |
| <i>R</i> <sub>1</sub>                                                            | 0.0235                             | 0.0210                               | 0.0310                               | 0.0526                              | 0.0533                             | 0.0204                                           |
| <i>wR</i> <sub>2</sub>                                                           | 0.0568                             | 0.0521                               | 0.0624                               | 0.1411                              | 0.1422                             | 0.0449                                           |
| <i>R</i> indices (all data)                                                      |                                    |                                      |                                      |                                     |                                    |                                                  |
| <i>R</i> <sub>1</sub>                                                            | 0.0269                             | 0.0222                               | 0.0447                               | 0.0545                              | 0.0591                             | 0.0224                                           |
| <i>wR</i> <sub>2</sub>                                                           | 0.0586                             | 0.0528                               | 0.0675                               | 0.1427                              | 0.11489                            | 0.0457                                           |
| Flack <i>x</i> parameter <sup>1</sup>                                            |                                    |                                      |                                      |                                     | -0.059(12)                         | 0.021(11)                                        |
| $\Delta\rho$ <sub>min</sub> and $\Delta\rho$ <sub>max</sub> (e Å <sup>-3</sup> ) | -0.745 and 0.914                   | -1.224 and 1.026                     | -1.715 and 1.212                     | -1.012 and 4.718                    | -1.542 and 4.754                   | -0.785 and 1.000                                 |

**Table S2** Crystallographic data and structure refinement details for (2-PhC<sub>6</sub>H<sub>4</sub>)BiBr<sub>2</sub> (**7**), (2-PhC<sub>6</sub>H<sub>4</sub>)BiI<sub>2</sub> (**8**) and (2-PhC<sub>6</sub>H<sub>4</sub>)<sub>3</sub>Sb (**9**).

|                                                                                  | <b>7</b>                                         | <b>8</b>                                                       | <b>9</b>                           |
|----------------------------------------------------------------------------------|--------------------------------------------------|----------------------------------------------------------------|------------------------------------|
| Empirical formula                                                                | C <sub>12</sub> H <sub>9</sub> BiBr <sub>2</sub> | C <sub>24</sub> H <sub>18</sub> Bi <sub>2</sub> I <sub>4</sub> | C <sub>36</sub> H <sub>27</sub> Sb |
| <i>M</i> (g mol <sup>-1</sup> )                                                  | 521.99                                           | 1231.94                                                        | 581.32                             |
| Temperature (K)                                                                  | 293                                              | 100                                                            | 100                                |
| $\lambda$ (Å)                                                                    | 0.71073 Å                                        | 0.71073                                                        | 0.71073                            |
| Crystal system                                                                   | monoclinic                                       | triclinic                                                      | monoclinic                         |
| Space group                                                                      | <i>P</i> 2 <sub>1</sub> / <i>c</i>               | <i>P</i> $\bar{1}$                                             | <i>P</i> 2 <sub>1</sub> / <i>n</i> |
| <i>a</i> (Å)                                                                     | 7.5467(5)                                        | 9.4889(9)                                                      | 10.0086(7)                         |
| <i>b</i> (Å)                                                                     | 9.2977(5)                                        | 9.9731(9)                                                      | 20.2781(14)                        |
| <i>c</i> (Å)                                                                     | 18.6372(12)                                      | 14.6288(13)                                                    | 13.7772(10)                        |
| $\alpha$ (deg)                                                                   | 90                                               | 102.420(3)                                                     | 90                                 |
| $\beta$ (deg)                                                                    | 94.936(6)                                        | 93.506(3)                                                      | 109.442(2)                         |
| $\gamma$ (deg)                                                                   | 90                                               | 92.701(3)                                                      | 90                                 |
| <i>V</i> (Å <sup>3</sup> )                                                       | 1302.87(14)                                      | 1346.9(2)                                                      | 2636.7(3)                          |
| <i>Z</i>                                                                         | 4                                                | 2                                                              | 4                                  |
| <i>D</i> <sub>calc</sub> (g cm <sup>-3</sup> )                                   | 2.661                                            | 3.038                                                          | 1.464                              |
| $\mu$ (mm <sup>-1</sup> )                                                        | 19.632                                           | 17.642                                                         | 1.070                              |
| <i>F</i> (000)                                                                   | 936                                              | 1080                                                           | 1176                               |
| Crystal size (mm)                                                                | 0.4 x 0.4 x 0.4                                  | 0.4 x 0.4 x 0.3                                                | 0.35 x 0.3 x 0.3                   |
| Reflections collected                                                            | 8056                                             | 33289                                                          | 27264                              |
| Independent reflections                                                          | 2349                                             | 5105                                                           | 4957                               |
| <i>R</i> <sub>int</sub>                                                          | 0.0597                                           | 0.0439                                                         | 0.0301                             |
| Number of data / restraints / parameters                                         | 2349 / 194 / 192                                 | 5105 / 0 / 272                                                 | 4957 / 0 / 335                     |
| Goodness-of-fit on <i>F</i> <sup>2</sup>                                         | 1.076                                            | 1.131                                                          | 1.045                              |
| Final <i>R</i> indices [ <i>I</i> > 2 $\sigma$ ( <i>I</i> )]                     |                                                  |                                                                |                                    |
| <i>R</i> <sub>1</sub>                                                            | 0.0390                                           | 0.0241                                                         | 0.0187                             |
| <i>wR</i> <sub>2</sub>                                                           | 0.0936                                           | 0.0601                                                         | 0.0469                             |
| <i>R</i> indices (all data)                                                      |                                                  |                                                                |                                    |
| <i>R</i> <sub>1</sub>                                                            | 0.0536                                           | 0.0253                                                         | 0.0205                             |
| <i>wR</i> <sub>2</sub>                                                           | 0.1030                                           | 0.0609                                                         | 0.0481                             |
| $\Delta\rho$ <sub>min</sub> and $\Delta\rho$ <sub>max</sub> (e Å <sup>-3</sup> ) | -1.090 and<br>1.490                              | -1.828 and<br>1.686                                            | -0.431 and<br>0.485                |

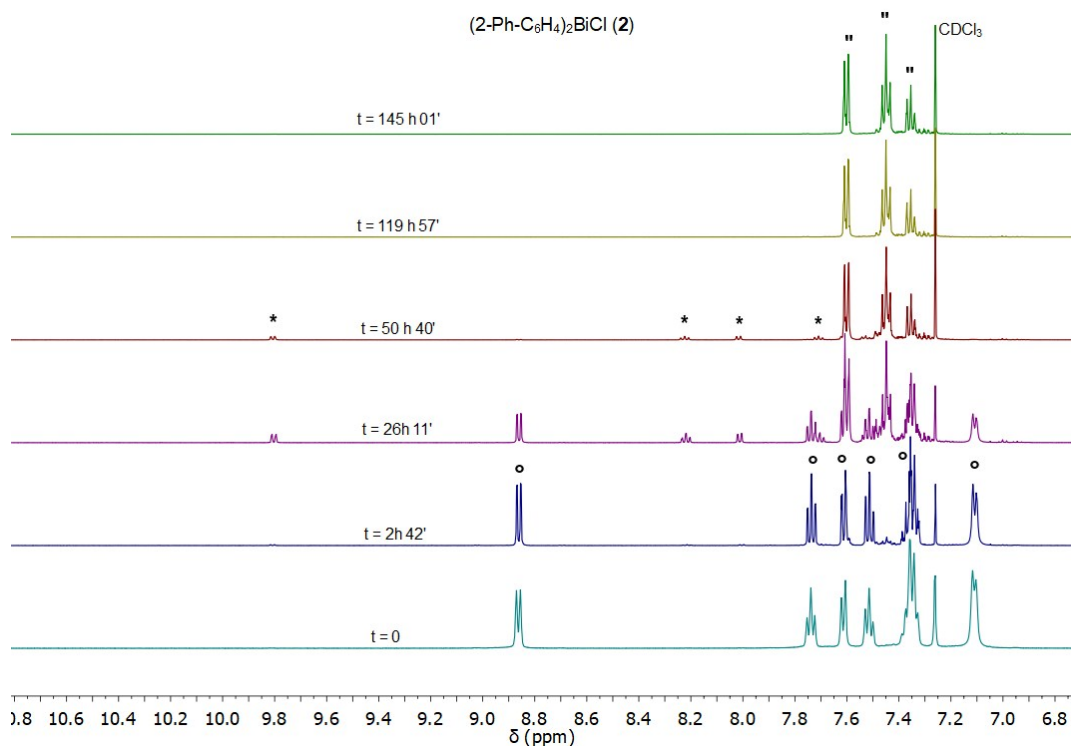

**Figure S1.** Time dependent <sup>1</sup>H NMR spectra of the stability of (2-Ph-C<sub>6</sub>H<sub>4</sub>)<sub>2</sub>BiCl (**2**) in CDCl<sub>3</sub> showing decomposition of **2** (°) to (2-Ph-C<sub>6</sub>H<sub>4</sub>)BiCl<sub>2</sub> (**6**) (\*) and the formation of C<sub>6</sub>H<sub>5</sub>-C<sub>6</sub>H<sub>5</sub> (\*\*).

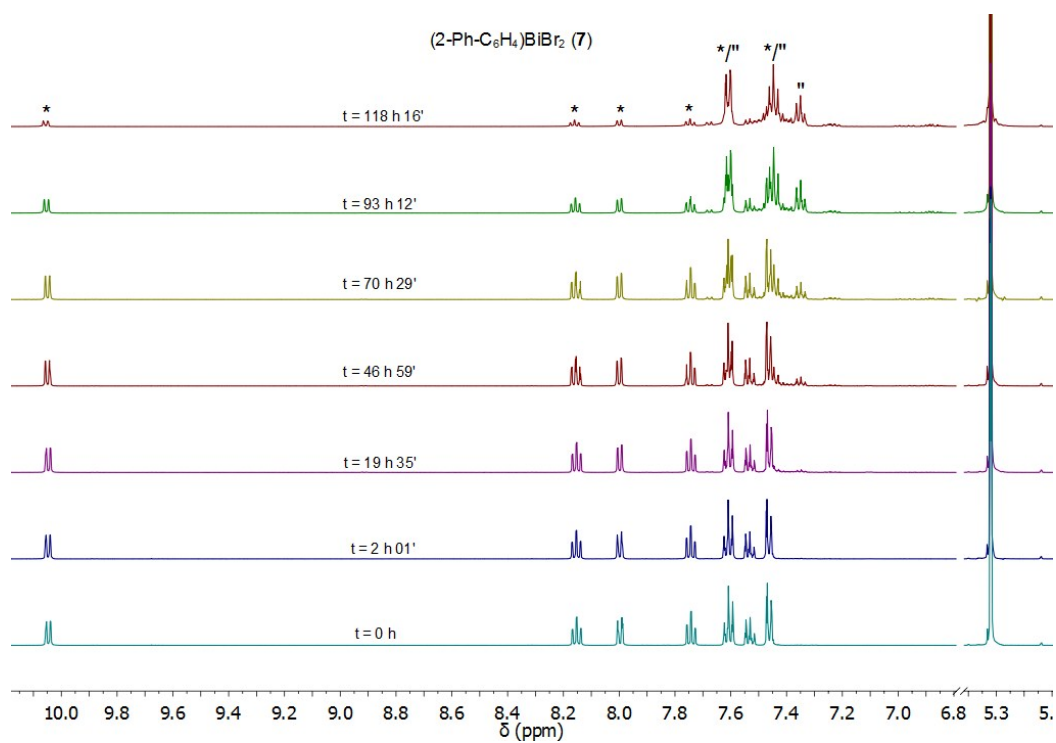

**Figure S2.** Time dependent <sup>1</sup>H NMR spectra of the stability of (2-Ph-C<sub>6</sub>H<sub>4</sub>)BiBr<sub>2</sub> (**7**) in CD<sub>2</sub>Cl<sub>2</sub> showing decomposition of **7** (\*) and the formation of C<sub>6</sub>H<sub>5</sub>-C<sub>6</sub>H<sub>5</sub> (\*\*).

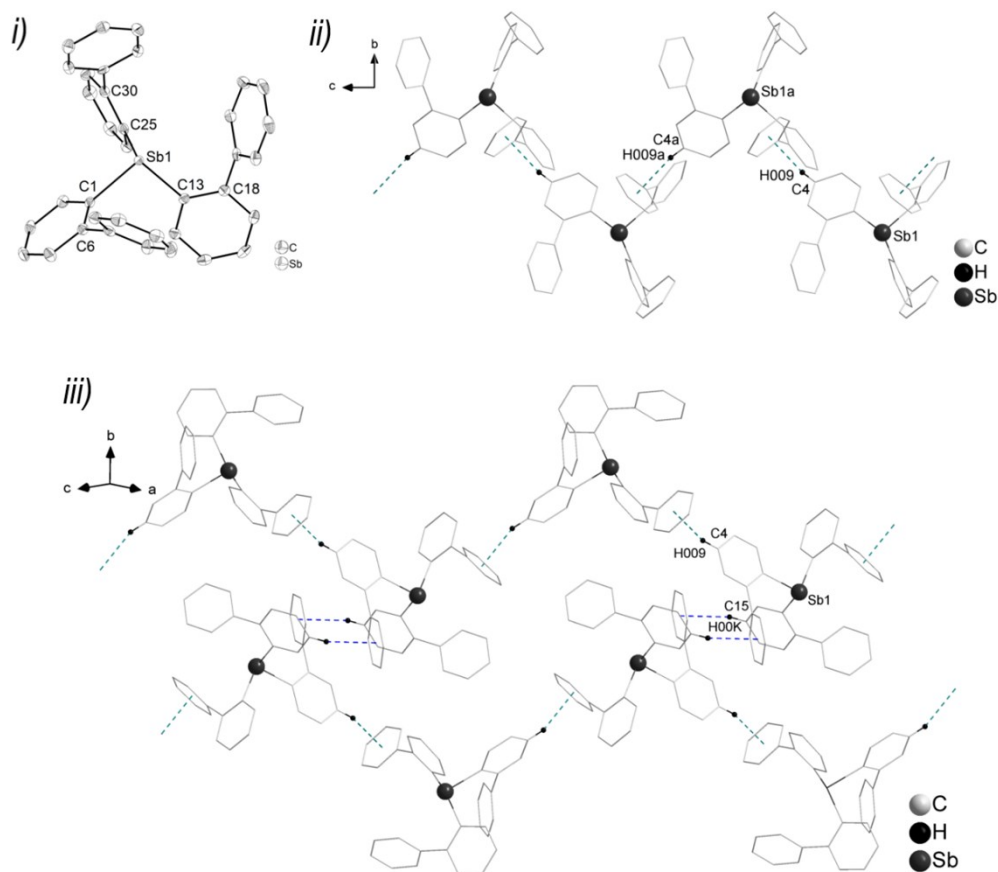

**Figure S3.** *i)* Thermal ellipsoid model of  $(2\text{-Ph-C}_6\text{H}_4)_3\text{Sb}$  (**9**) at 50% probability level. Hydrogen atoms were omitted for clarity [only hydrogen atoms involved in  $\text{C-H}\cdots\text{Ph}_{\text{centroid}}$  contacts are shown]. Selected bond lengths [Å]:  $\text{Sb1-C1}$  2.1698(16),  $\text{Sb1-C13}$  2.1608(16),  $\text{Sb1-C25}$  2.1637(16),  $\text{Sb1}\cdots\text{Ph}_{\text{centroid(I)}}$  4.05,  $\text{Sb1}\cdots\text{Ph}_{\text{centroid(II)}}$  4.05,  $\text{Sb1}\cdots\text{Ph}_{\text{centroid(III)}}$  4.00. Selected bond angles [°]:  $\text{C1-Sb1-C13}$  96.46(6),  $\text{C1-Sb1-C25}$  93.78(6),  $\text{C13-Sb1-C25}$  97.25(6),  $\text{Sb1-C1-C6}$  118.33(12),  $\text{Sb1-C13-C18}$  118.54(12),  $\text{Sb1-C25-C30}$  117.96(12). *ii)* Wire and stick model of 1D ribbon (view along the *a*-axis):  $\text{C4-H009}\cdots\text{Ph}_{\text{centroid}}$  2.504 Å (teal dashed line,  $\gamma = 4.5^\circ$ ). *iii)* wire and stick model of 2D network formed via  $\text{C15-H00K}\cdots\text{Ph}_{\text{centroid}}$  3.050 Å (violet dashed line,  $\gamma = 19.1^\circ$ ). Symmetry transformations:  $a = \frac{1}{2} + x$ ,  $\frac{3}{2} - y$ ,  $\frac{1}{2} + z$ .

#### *Solid state structure of $(2\text{-Ph-C}_6\text{H}_4)_3\text{Sb}$ (**9**)*

Single crystals of compound **9** suitable for X-ray diffraction were grown from a  $\text{CH}_2\text{Cl}_2$  solution at ambient temperature. The molecular structure of **9** is shown in Figure S3, the selected bond lengths and angles are listed in the Figure caption and the crystallographic data are given in

Table S2. Compound **9** crystallizes in the same monoclinic space group  $P2_1/n$  as **1** and are isostructural, showing similar molecular structures in the solid state, with a trigonal pyramidal geometry at the antimony atom. For **9** the average value of the Sb–C bond lengths of 2.165 Å is similar to those found in other antimony compounds, i.e.  $\text{Ph}_3\text{Sb}$  (2.154 Å, for an average value of C–Sb–C bond angles of  $97.2^\circ$ ),<sup>2</sup> (*p*-tolyl)<sub>3</sub>Sb (2.141 Å, for an average value of C–Sb–C bond angles of  $97.3^\circ$ ),<sup>3</sup> (*o*-tolyl)<sub>3</sub>Sb (polymorph **a**: 2.166 Å; polymorph **b**: 2.162 Å; average value of C–Sb–C bond angles of  $97.4^\circ$ , and  $96.7^\circ$ , respectively),<sup>4</sup> but significantly smaller than those found in the polymorphs of  $\text{Me}_3\text{Sb}$  (polymorph **a**: 2.184 Å; polymorph **b**: 2.182 Å; ; average value of C–Sb–C bond angles of  $105.6^\circ$ , and  $105.0^\circ$ , respectively).<sup>5</sup> The dispersion type  $\text{Sb}\cdots\text{Ph}_{\text{centroid}}$  interaction of av. 4.04 Å in **9** are not distinct from those as observed for the analogous bismuth compound **1**. However, the presence of  $\text{C–H}\cdots\text{Ph}_{\text{centroid}}$  contacts dominates also in the structure of **9**, which forms 1D ribbon via  $\text{C–H}\cdots\text{Ph}_{\text{centroid}}$  intermolecular contacts with  $\text{C4–H009}\cdots\text{Ph}_{\text{centroid}}$  2.50 Å (teal dashed line,  $\gamma = 4.5^\circ$ ). Furthermore, the 1D ribbon are connected via additional intermolecular contacts with  $\text{C15–H00K}\cdots\text{Ph}_{\text{centroid}}$  3.05 Å to give a 2D network.

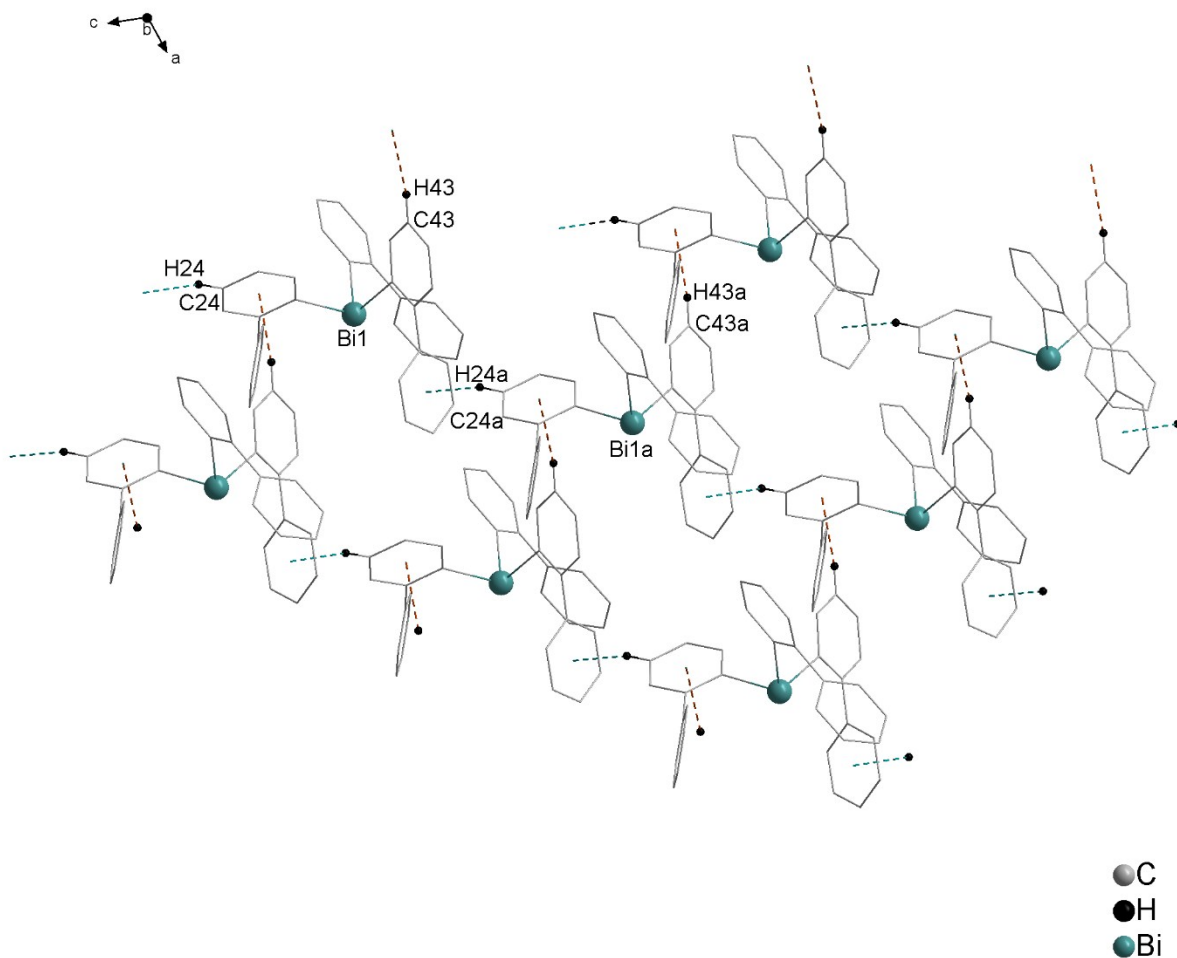

**Figure S4.** Wire and stick model of  $(2\text{-PhC}_6\text{H}_4)_3\text{Bi}$  (**1**). Hydrogen atoms were omitted for clarity [only hydrogen atoms involved in  $\text{C-H}\cdots\text{Ph}_{\text{centroid}}$  contacts are shown]. *i*) 1D ribbon (view along the *a*-axis):  $\text{C24-H24}\cdots\text{Ph}_{\text{centroid}}$  2.55 Å (teal dashed line,  $\gamma = 5.6^\circ$ ). *ii*) wire and stick model of 2D network (view along the *b*-axis) formed via  $\text{C43-H43}\cdots\text{Ph}_{\text{centroid}}$  3.06 (violet dashed line,  $\gamma = 10.3^\circ$ ). Symmetry transformations:  $a = \frac{1}{2} + x$ ,  $\frac{1}{2} - y$ ,  $-\frac{1}{2} + z$ .



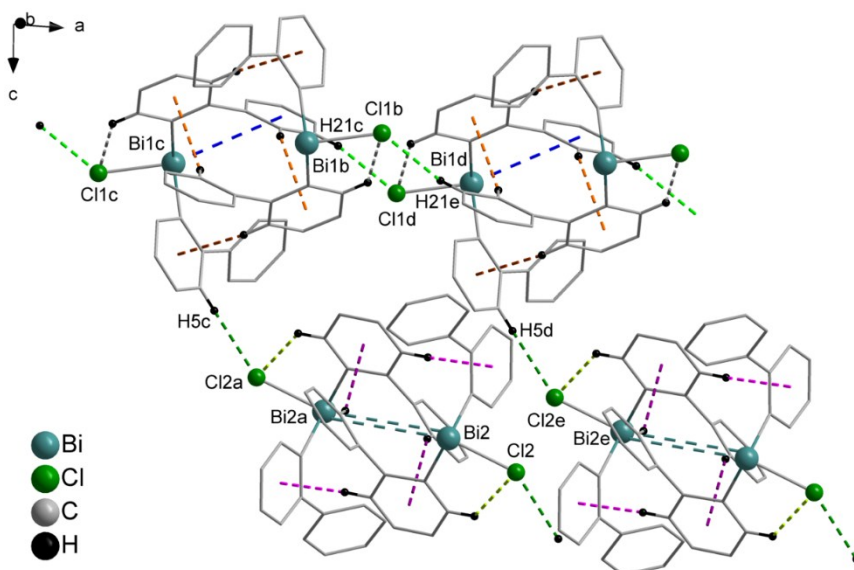

**Figure S5.** Wire and stick model of 2D network (view along the *b*-axis) of  $(2\text{-PhC}_6\text{H}_4)_2\text{BiCl}$  (**2**) formed via Cl $\cdots$ H intermolecular contacts: C5c–H5c $\cdots$ Cl2a 2.75 Å (bright green dashed line), C21e–H21e $\cdots$ Cl1b 2.86 Å (green dashed line). Symmetry transformations:  $a = 1 - x, -y, 1 - z$ ,  $b = -x, 1 - y, -z$ ;  $c = x, -1 + y, z$ ;  $d = 1 + x, 1 + y, z$ ;  $e = 1 - x, 1 - y, -z$ .

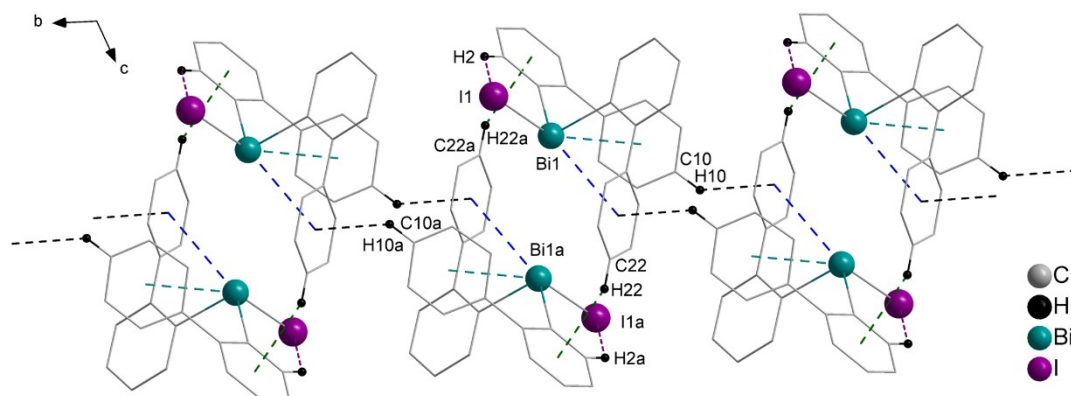

**Figure S6.** Wire and stick model of 1D ribbon (view along the *a*-axis) of  $(2\text{-PhC}_6\text{H}_4)_2\text{BiI}$  (**4**) formed via intermolecular contacts C10–H10 $\cdots$ Ph<sub>centroid</sub> 2.81 Å (black dashed line,  $\gamma = 10.7^\circ$ ). Symmetry transformations:  $a = 1 - x, 1 - y, 1 - z$ .

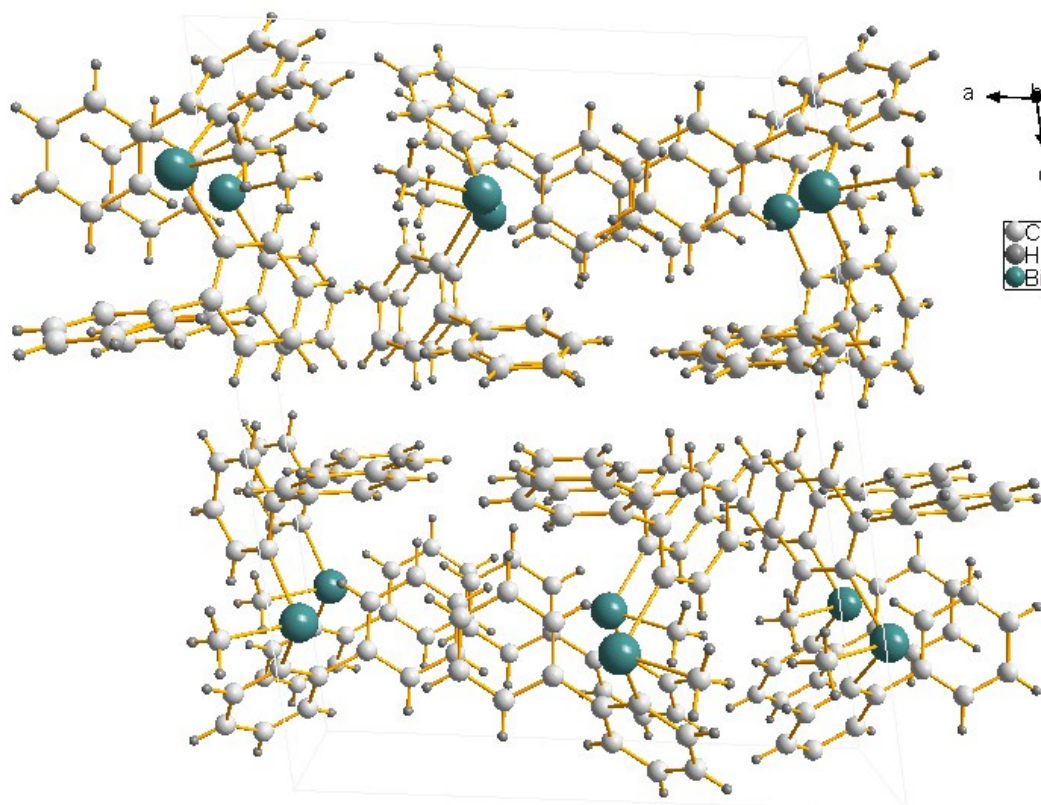

**Figure S7.** Ball and stick model of  $(2\text{-Ph-C}_6\text{H}_4)_2\text{BiMe}$  (**5**); view along *b* axis.

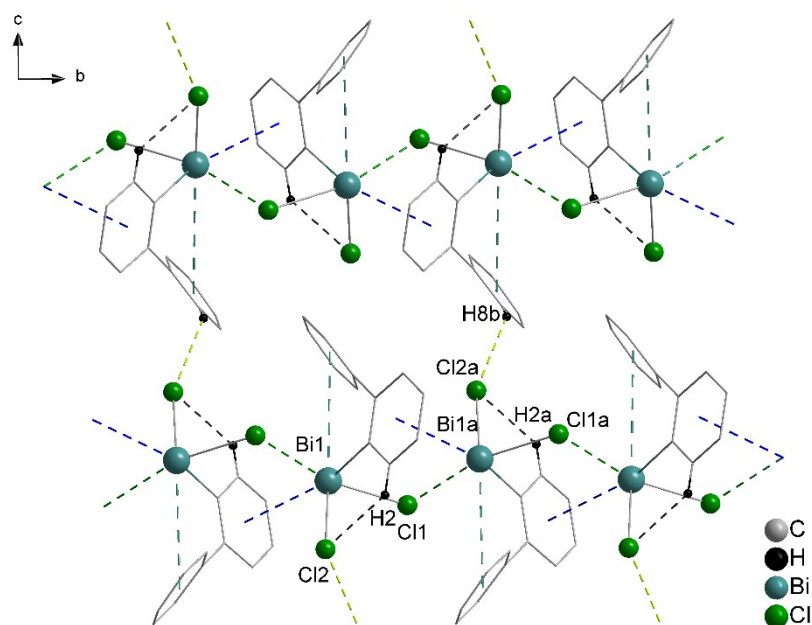

**Figure S8.** Wire and stick model of 2D network (view along the *a*-axis) of  $(2\text{-PhC}_6\text{H}_4)\text{BiCl}_2$  (**6**) formed via  $\text{H}\cdots\text{Cl}$  intermolecular contacts  $\text{C8b-H8b}\cdots\text{Cl2a}$  2.81 Å (lime dashed line). Symmetry transformations:  $a = 2 - x, \frac{1}{2} + y, \frac{1}{2} - z$ ,  $b = -\frac{1}{2} + x, \frac{3}{2} - y, 1 - z$ .

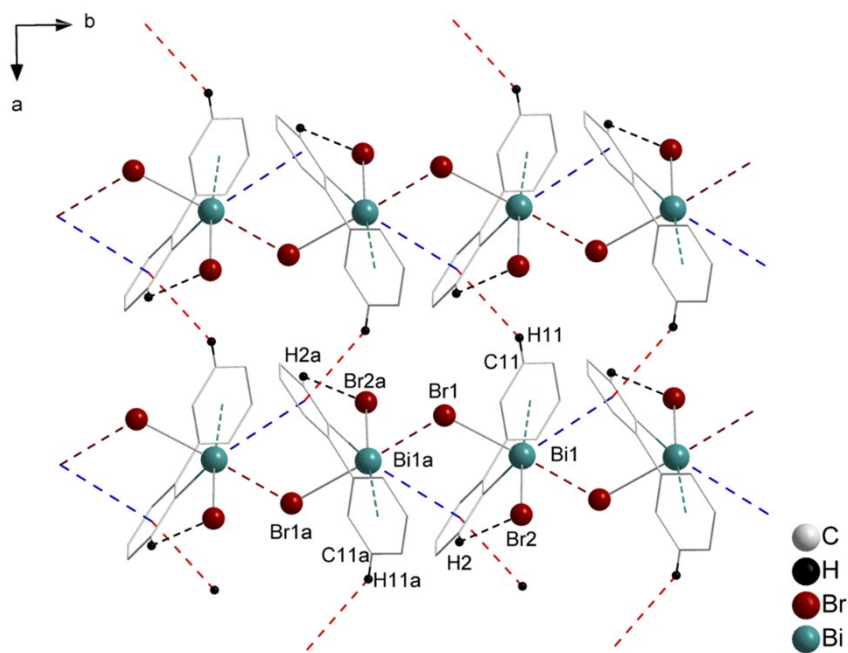

**Figure S9.** Wire and stick model of 2D network (view along the *c*-axis) of (2-PhC<sub>6</sub>H<sub>4</sub>)BiBr<sub>2</sub> (**7**) formed via intermolecular contacts C11–H11⋯Ph<sub>centroid</sub> 2.84 Å (red dashed line,  $\gamma = 13.1^\circ$ ). Symmetry transformations:  $a = -x, \frac{1}{2} + y, \frac{1}{2} - z$ .

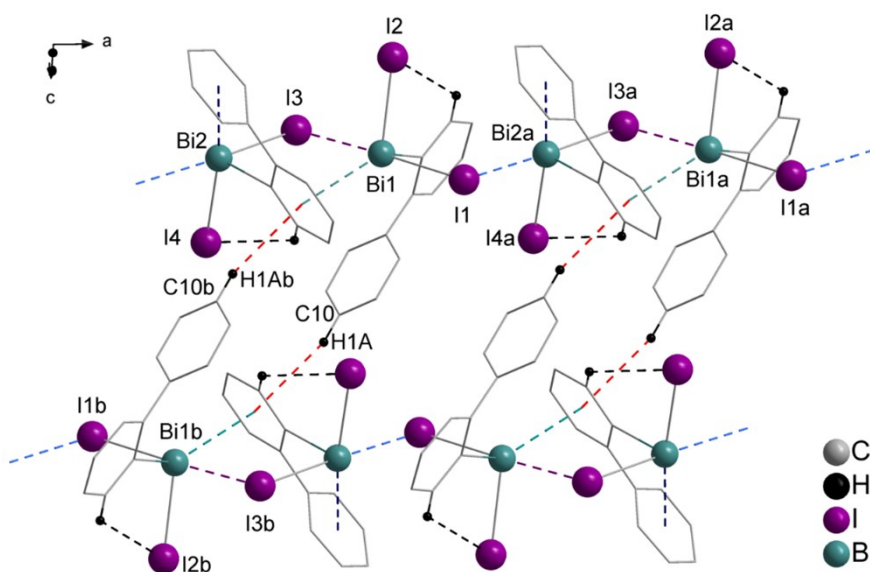

**Figure S10.** Wire and stick model of 2D network (view along the *b*-axis) of (2-PhC<sub>6</sub>H<sub>4</sub>)BiI<sub>2</sub> (**8**) formed via intermolecular contacts C10–H1A⋯Ph<sub>centroid</sub> 2.87 Å (red dashed line,  $\gamma = 17.1^\circ$ ). Symmetry transformations:  $a = 1 + x, y, z, b = -x, 1 - y, 1 - z$ .

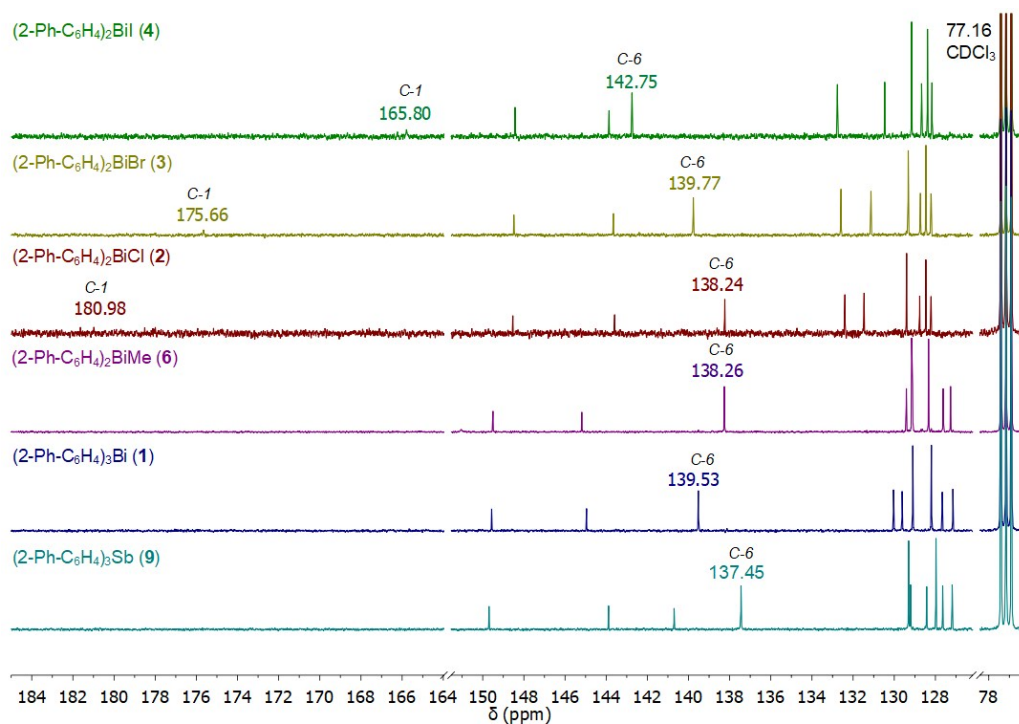

**Figure S11.** Comparison of  $^{13}\text{C}$  NMR spectra (aromatic region) in  $\text{CDCl}_3$  of compounds 1–5 and 9 showing a large downfield shifts for the resonances belonging to C-6 placed in *ortho* position to bismuth atom and for C-1 of compounds 2–4, respectively.

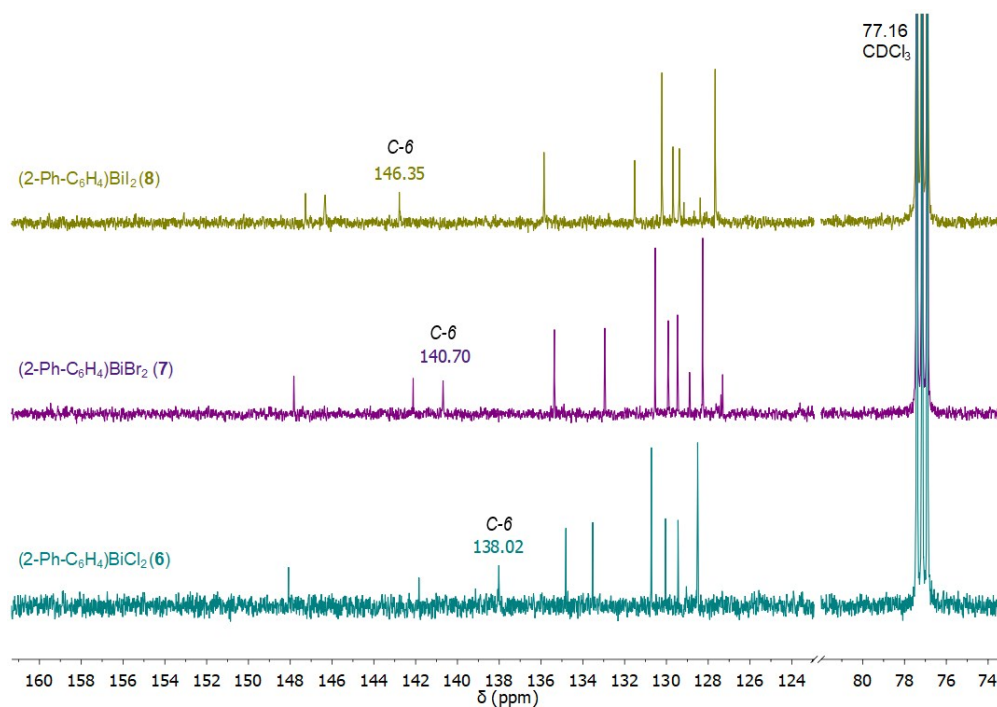

**Figure S12.** Comparison of  $^{13}\text{C}$  NMR spectra (aromatic region) in  $\text{CDCl}_3$  of compounds 6–8 showing a large downfield shifts for the resonances belonging to C-6 placed in *ortho* position to bismuth atom.

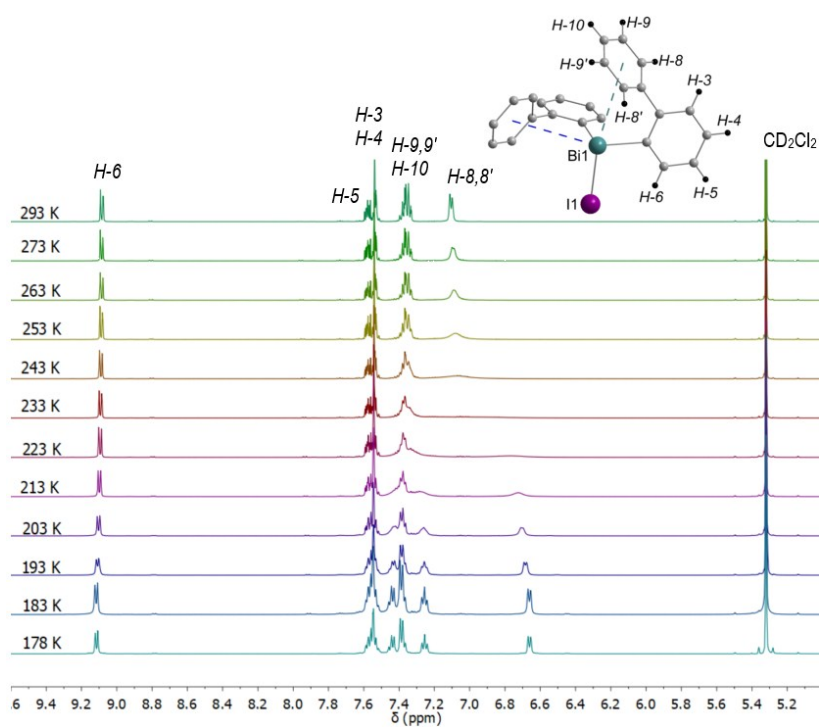

**Figure S13.** Temperature dependent  $^1\text{H}$  NMR spectra of  $(2\text{-PhC}_6\text{H}_4)_2\text{Bil}$  (**4**) measured in  $\text{CD}_2\text{Cl}_2$ , showing the region for aromatic protons including the numbering scheme.

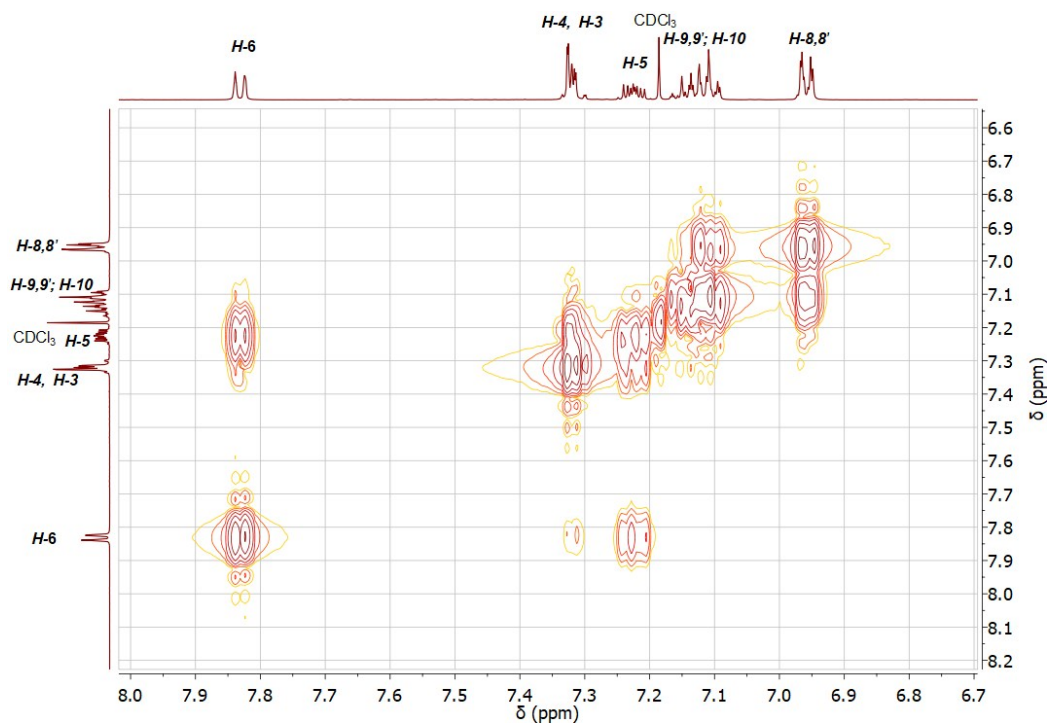

**Figure S14.**  $^1\text{H}$ - $^1\text{H}$  COSY NMR spectrum of  $(2\text{-Ph-C}_6\text{H}_4)_3\text{Bi}$  (**1**) in  $\text{CDCl}_3$  at 500.30 MHz.

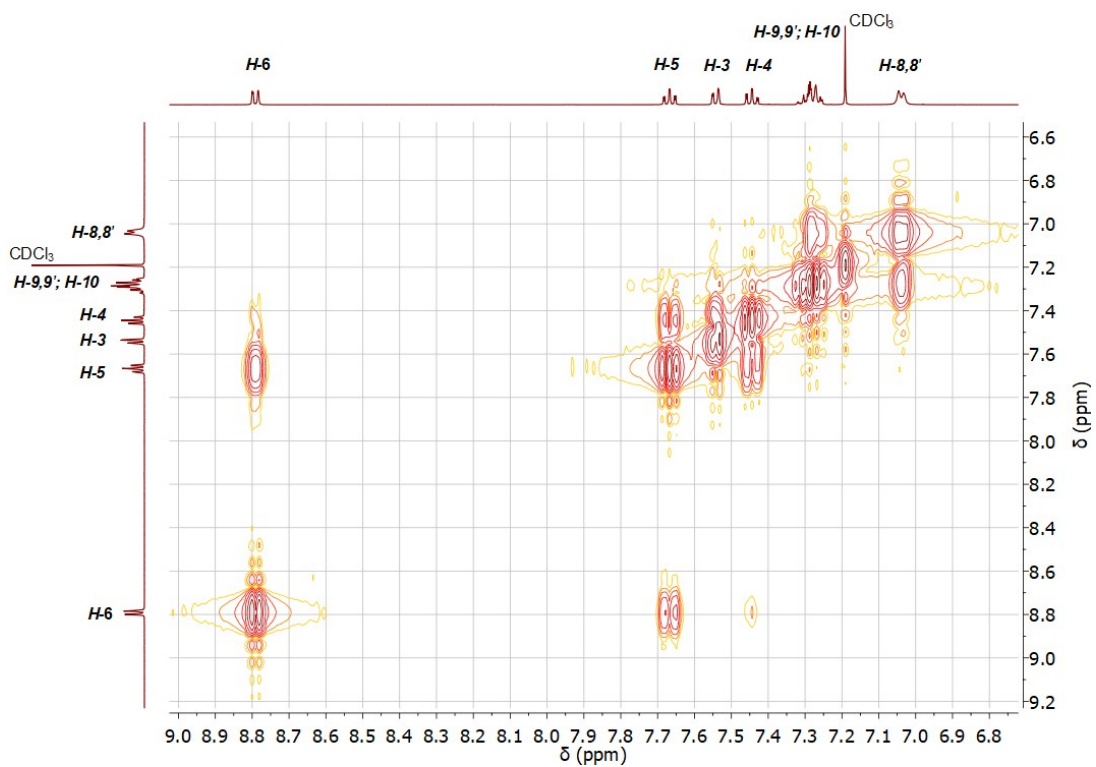

**Figure S15.**  $^1\text{H}$ - $^1\text{H}$  COSY NMR spectrum of  $(2\text{-Ph-C}_6\text{H}_4)_2\text{BiCl}$  (**2**) in  $\text{CDCl}_3$  at 500.30 MHz.

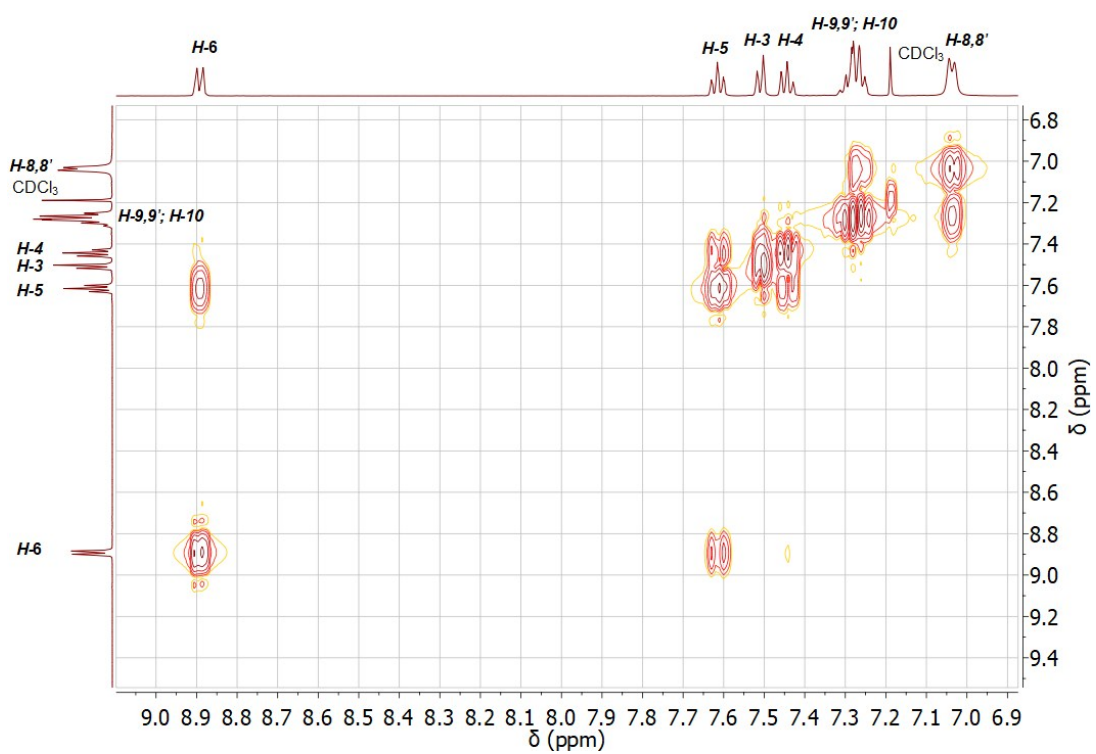

**Figure S16.**  $^1\text{H}$ - $^1\text{H}$  COSY NMR spectrum of  $(2\text{-Ph-C}_6\text{H}_4)_2\text{BiBr}$  (**3**) in  $\text{CDCl}_3$  at 500.30 MHz.

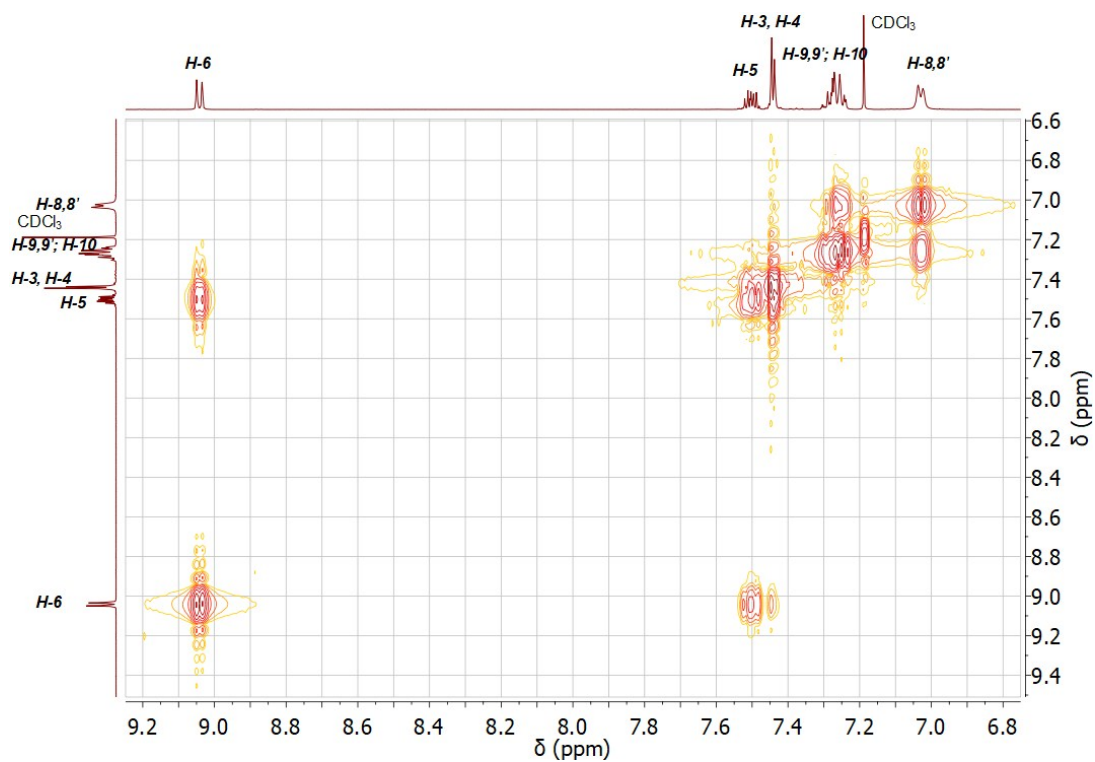

**Figure S17.**  $^1\text{H}$ - $^1\text{H}$  COSY NMR spectrum of (2-Ph- $\text{C}_6\text{H}_4$ ) $_2$ BiI (**4**) in  $\text{CDCl}_3$  at 500.30 MHz.

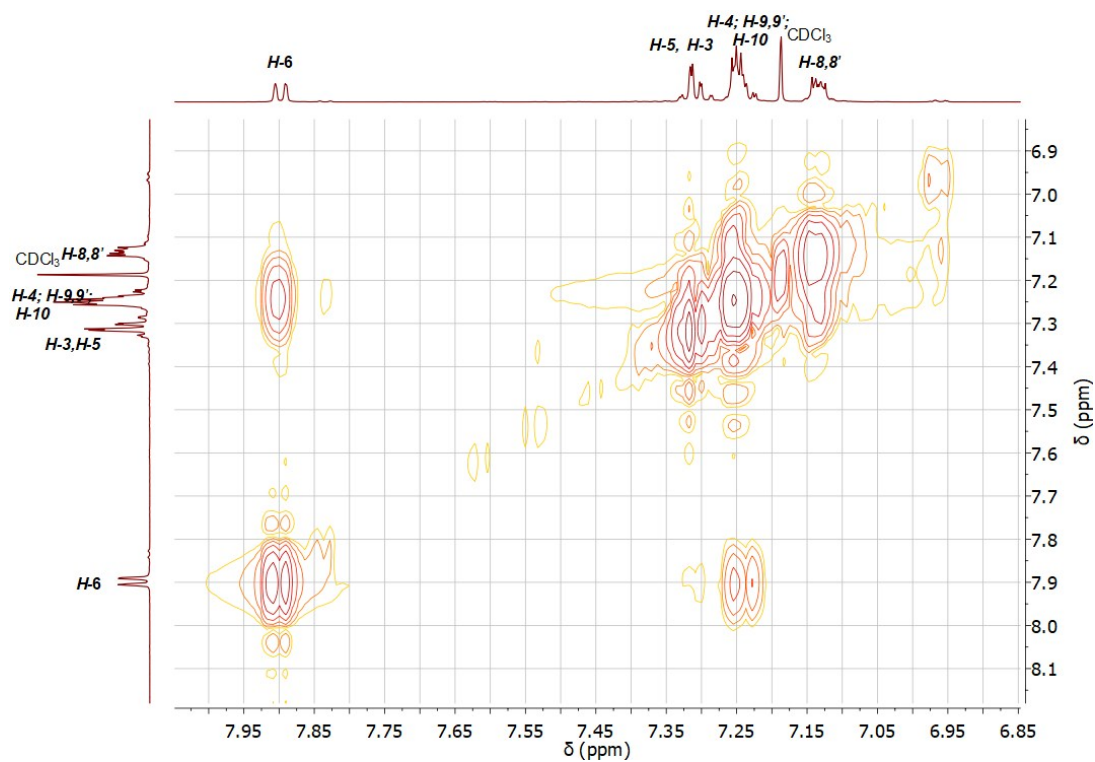

**Figure S18.**  $^1\text{H}$ - $^1\text{H}$  COSY NMR spectrum of (2-Ph- $\text{C}_6\text{H}_4$ ) $_2$ BiMe (**5**) in  $\text{CDCl}_3$  at 500.30 MHz.

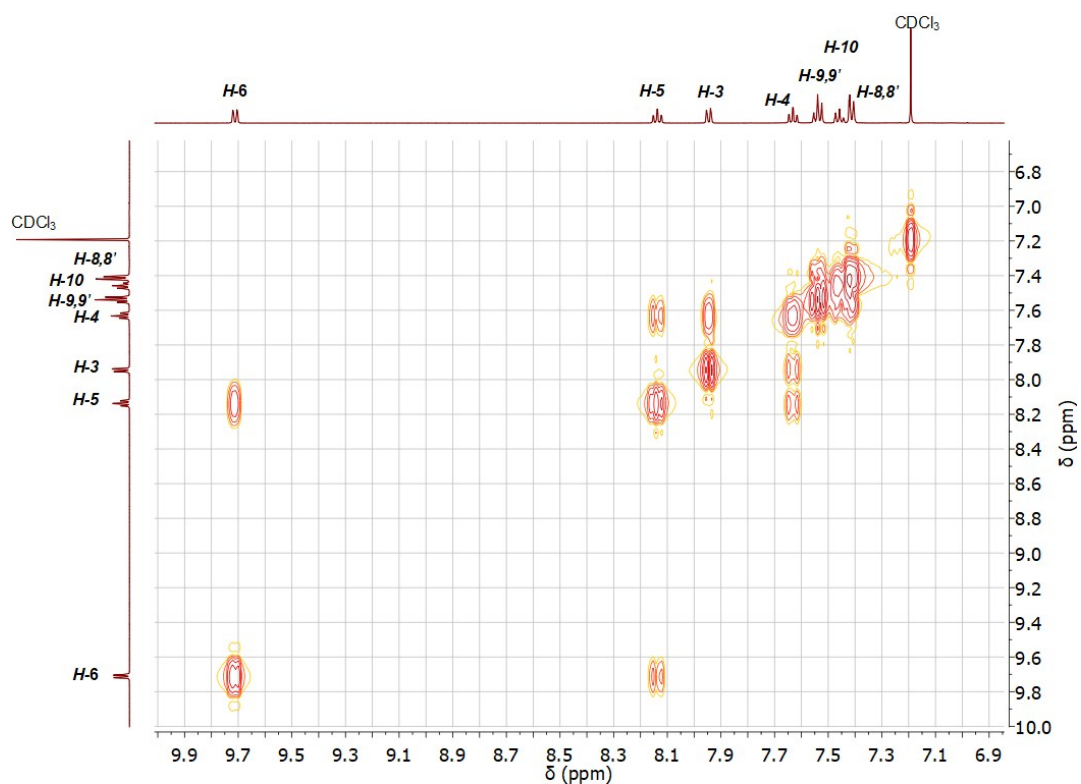

**Figure S19.** <sup>1</sup>H-<sup>1</sup>H COSY NMR spectrum of (2-Ph-C<sub>6</sub>H<sub>4</sub>)BiCl<sub>2</sub> (**6**) in CDCl<sub>3</sub> at 500.30 MHz.

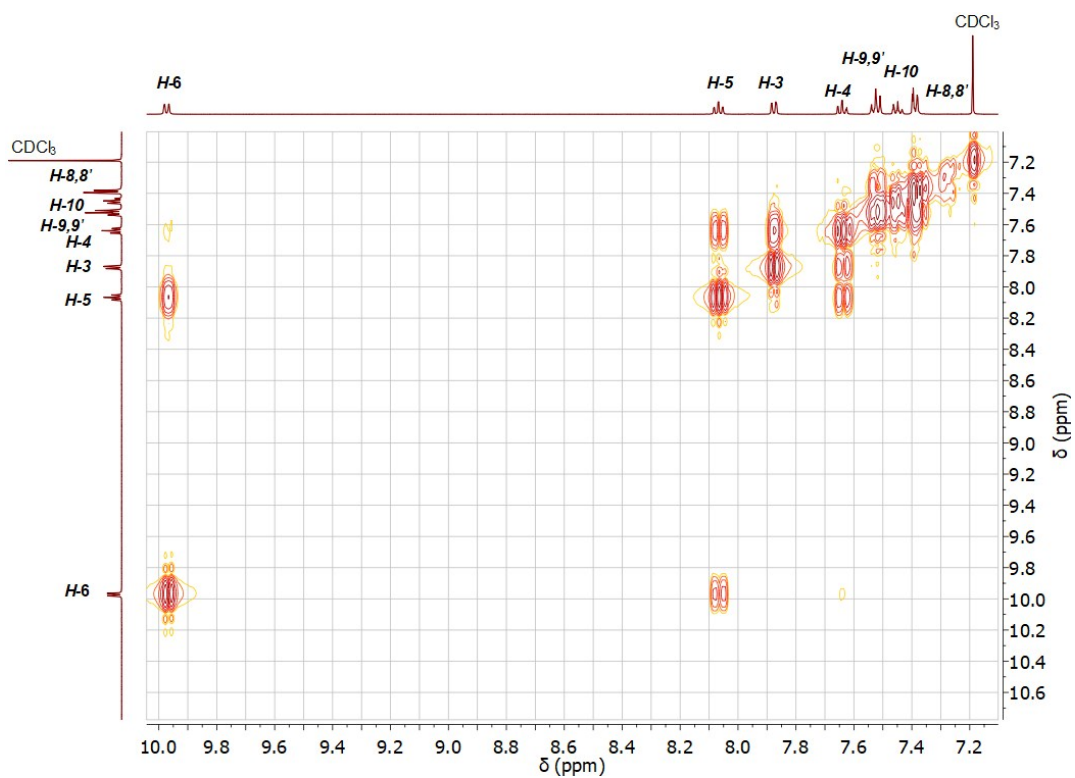

**Figure S20.** <sup>1</sup>H-<sup>1</sup>H COSY NMR spectrum of (2-Ph-C<sub>6</sub>H<sub>4</sub>)BiBr<sub>2</sub> (**7**) in CDCl<sub>3</sub> at 500.30 MHz.



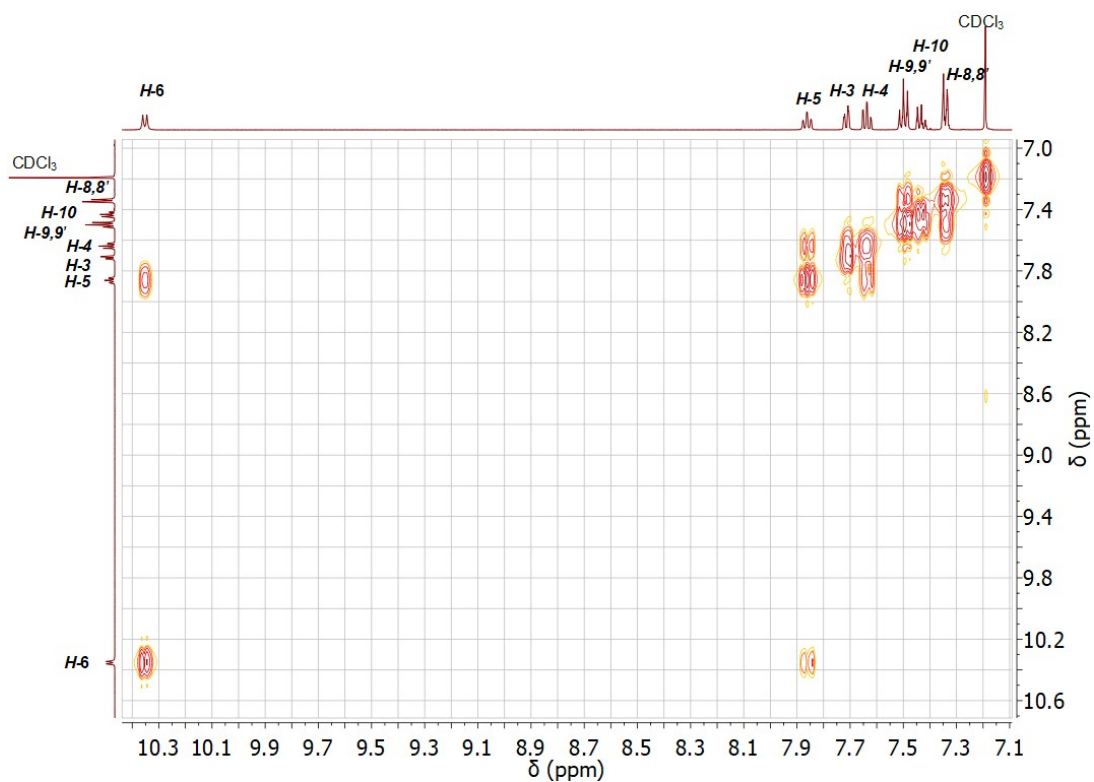

**Figure S21.**  $^1\text{H}$ - $^1\text{H}$  COSY NMR spectrum of  $(2\text{-Ph-C}_6\text{H}_4)\text{Bi}_2$  (**8**) in  $\text{CDCl}_3$  at 500.30 MHz.

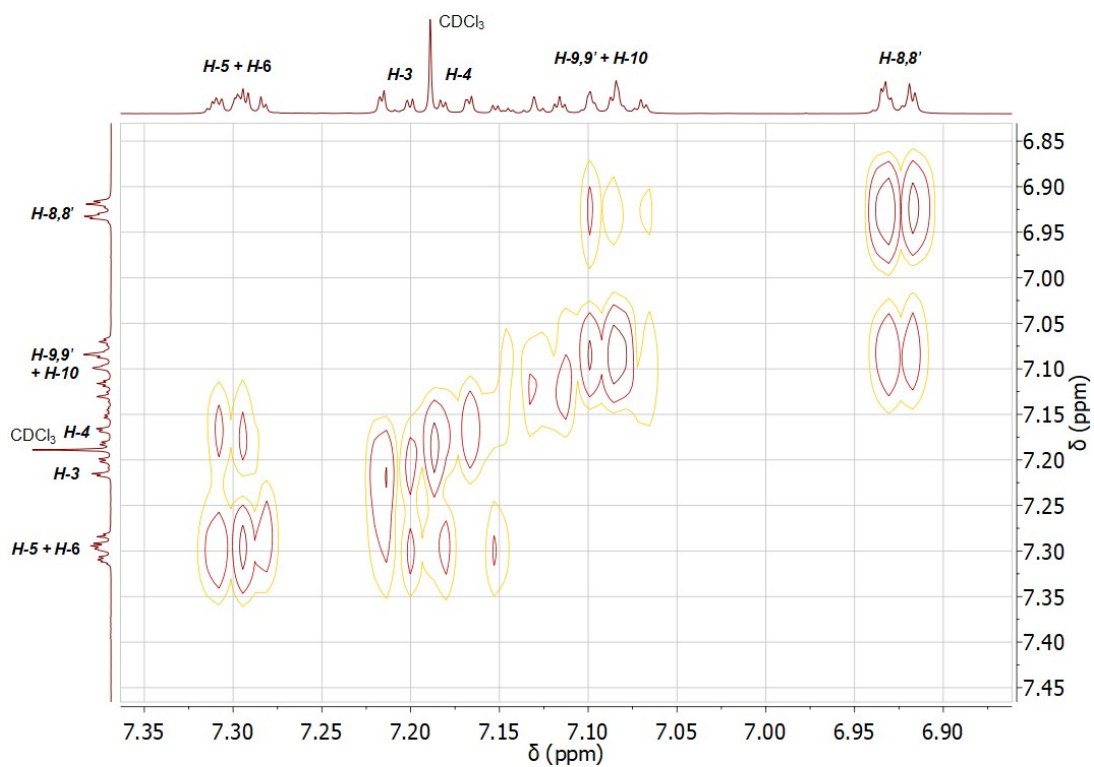

**Figure S22.**  $^1\text{H}$ - $^1\text{H}$  COSY NMR spectrum of  $(2\text{-Ph-C}_6\text{H}_4)_3\text{Sb}$  (**9**) in  $\text{CDCl}_3$  at 500.30 MHz.

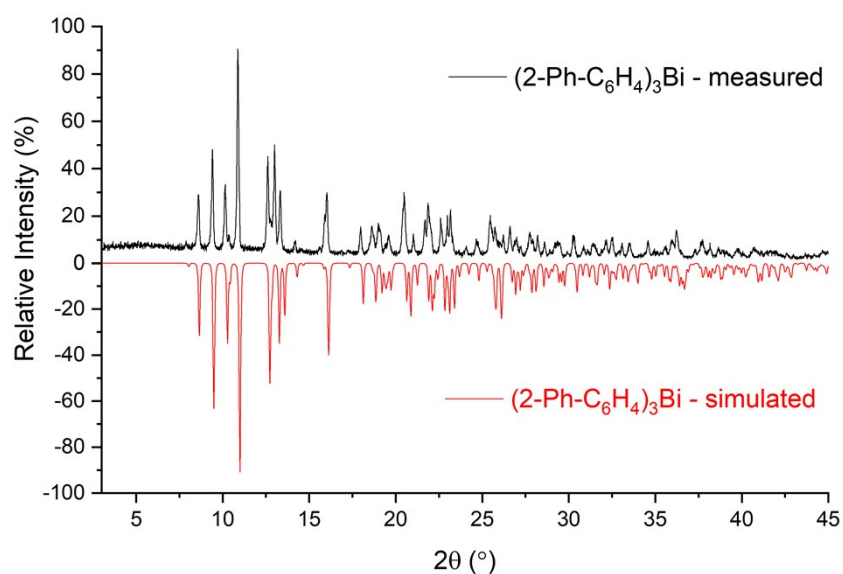

**Figure S23.** Powder X-ray diffraction pattern of  $(2\text{-Ph-C}_6\text{H}_4)_3\text{Bi}$  (**1**) at 293 K, measured for isolated material (black) and calculated from single crystal X-ray data measured at 120 K (red).

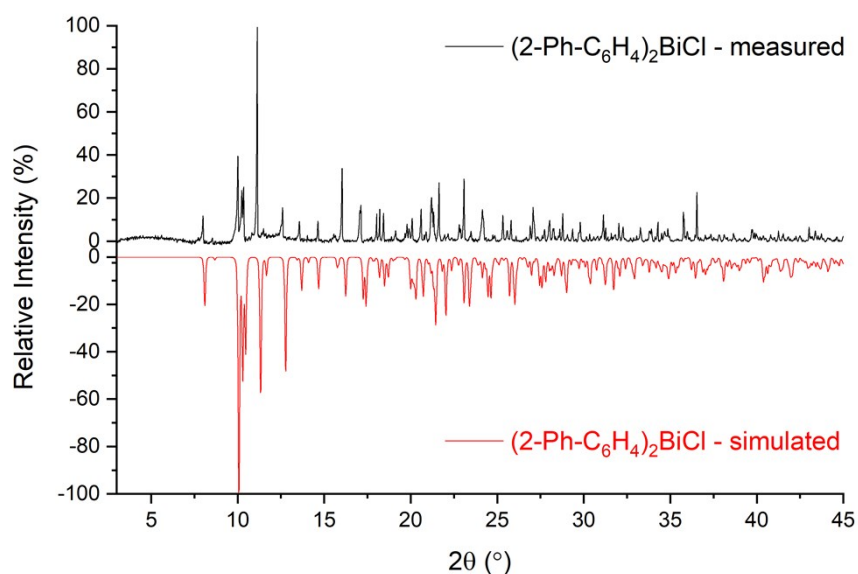

**Figure S24.** Powder X-ray diffraction pattern of  $(2\text{-Ph-C}_6\text{H}_4)_2\text{BiCl}$  (**2**) at 293 K, measured for isolated material (black) and calculated from single crystal X-ray data measured at 100 K (red).

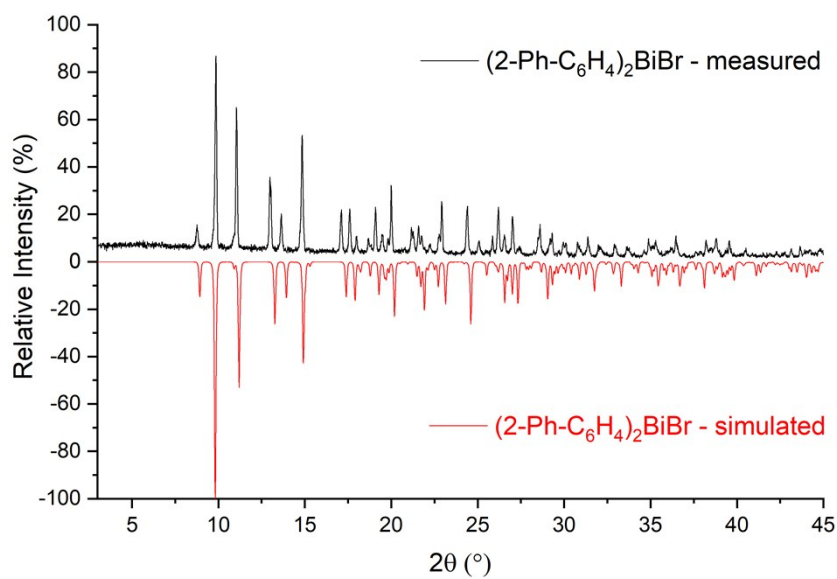

**Figure S25.** Powder X-ray diffraction pattern of  $(2\text{-Ph-C}_6\text{H}_4)_2\text{BiBr}$  (**3**) at 293 K, measured for isolated material (black) and calculated from single crystal X-ray data measured at 115.7 K (red).

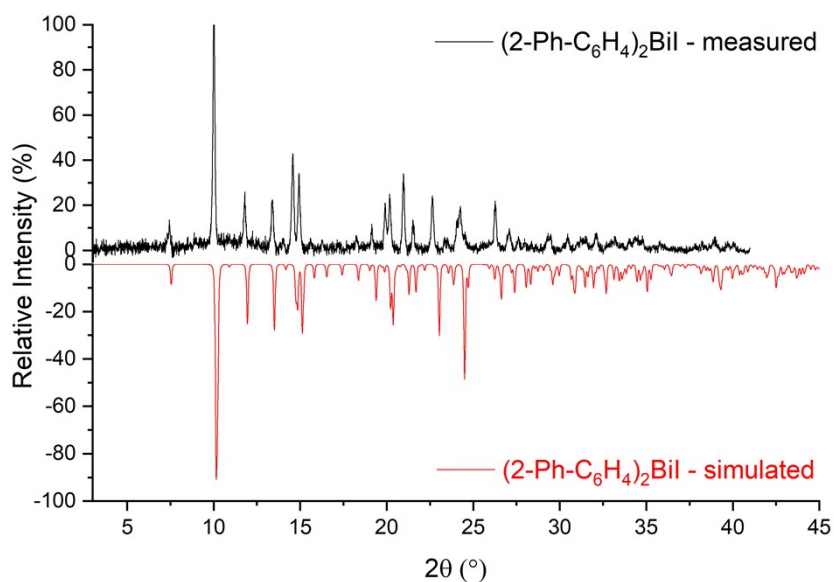

**Figure S26.** Powder X-ray diffraction pattern of  $(2\text{-Ph-C}_6\text{H}_4)_2\text{BiI}$  (**4**) at 293 K, measured for isolated material (black) and calculated from single crystal X-ray data measured at 100 K (red).

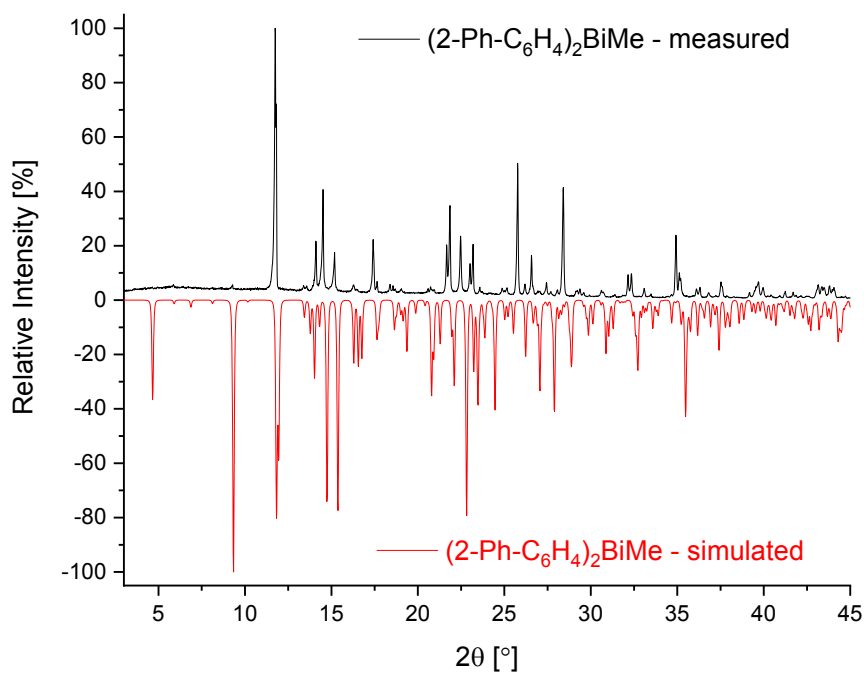

**Figure S27.** Powder X-ray diffraction pattern of  $(2\text{-Ph-C}_6\text{H}_4)_2\text{BiMe}$  (**5**) at 293 K, measured for isolated needles (black) and calculated from single crystal X-ray data measured at 100 K (red). We attribute the difference of the diffractograms to the formation of different polymorphs at ambient and low temperature.

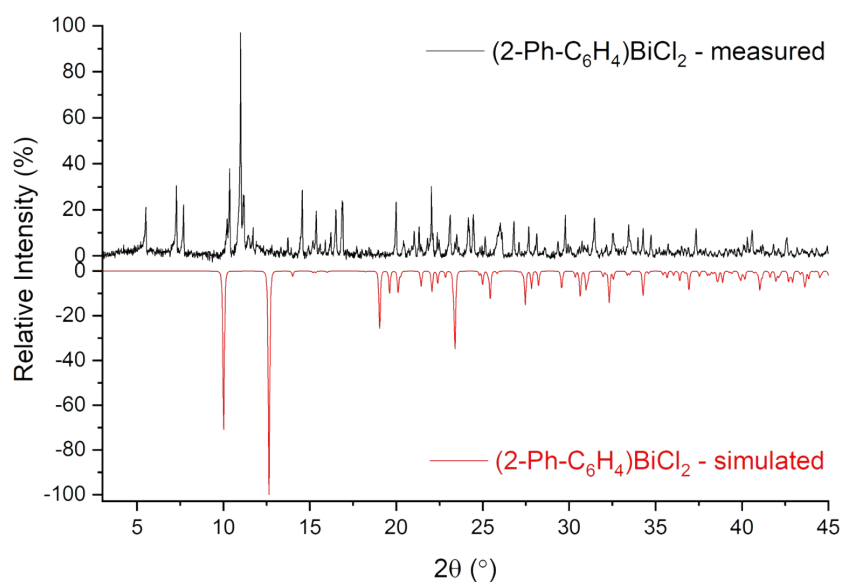

**Figure S28.** Powder X-ray diffraction pattern of  $(2\text{-Ph-C}_6\text{H}_4)\text{BiCl}_2$  (**6**) at 293 K, measured for isolated material (black) and calculated from single crystal X-ray data measured at 100 K (red). We attribute the difference of the diffractograms to the formation of different polymorphs at ambient and low temperature.

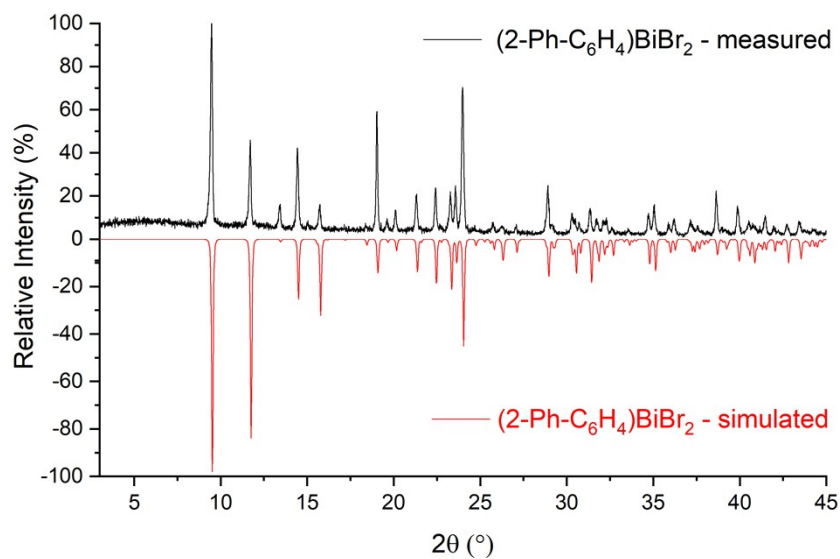

**Figure S29.** Powder X-ray diffraction pattern of  $(2\text{-Ph-C}_6\text{H}_4)\text{BiBr}_2$  (**7**) at 293 K, measured for isolated material (black) and calculated from single crystal X-ray data measured at 293 K (red).

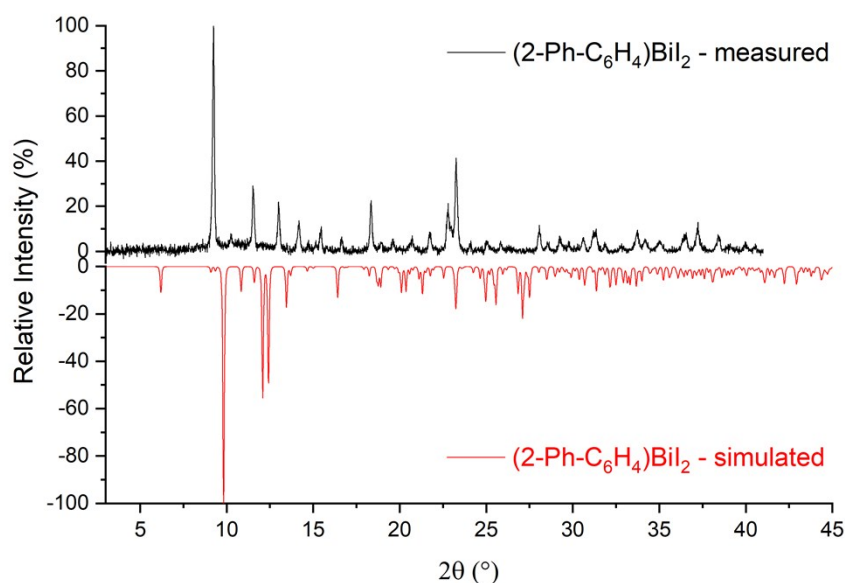

**Figure S30.** Powder X-ray diffraction pattern of  $(2\text{-Ph-C}_6\text{H}_4)\text{BiI}_2$  (**8**) at 293 K, measured for isolated material (black) and calculated from single crystal X-ray data measured at 100 K (red). We attribute the difference of the diffractograms to the formation of different polymorphs at ambient and low temperature.

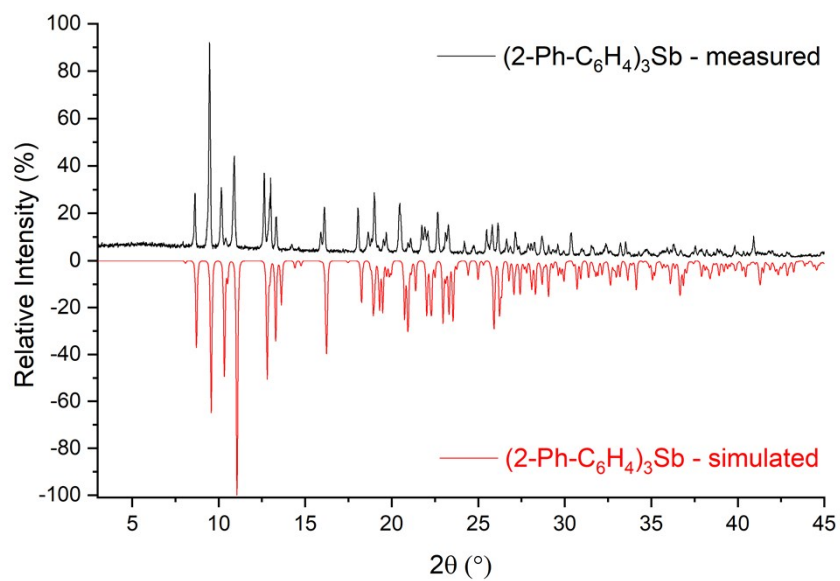

**Figure S31.** Powder X-ray diffraction pattern of (2-Ph-C<sub>6</sub>H<sub>4</sub>)<sub>3</sub>Sb (**9**) at 293 K, measured for isolated material (black) and calculated from single crystal X-ray data measured at 100 K (red).

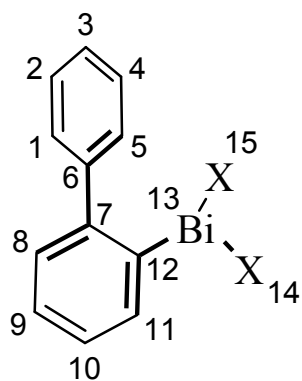

**Figure S32.** Definition of the dihedral angle  $\alpha$  and  $\beta$  displayed in Fig. 17 and 18 in the main manuscript: **C11-C12-Bi13-X14** and **C8-C7-C6-C5**, respectively (in bold). These angle notations have been used to perform the relaxed dihedral angle scan which are described in main manuscript. Hydrogen atoms have been omitted for clarity.

**RBiCl<sub>2</sub>** (R =2-PhC<sub>6</sub>H<sub>4</sub>)

Coordinates of structure 1:

|    |              |              |              |
|----|--------------|--------------|--------------|
| C  | 0.120020090  | 1.247940601  | 0.066203983  |
| C  | 0.262380137  | 2.029158668  | -1.098691705 |
| C  | 1.180857834  | 3.083771341  | -1.148595617 |
| C  | 1.958176773  | 3.381142116  | -0.029812365 |
| C  | 1.802690526  | 2.631981855  | 1.140890100  |
| C  | 0.893494471  | 1.576885567  | 1.189671744  |
| C  | -0.773952488 | 0.065657604  | 0.063051402  |
| C  | -0.589279619 | -0.924281620 | -0.921997382 |
| C  | -1.415802292 | -2.049240581 | -0.945989259 |
| C  | -2.419267897 | -2.201855692 | 0.015251930  |
| C  | -2.590024056 | -1.233317815 | 1.007365537  |
| C  | -1.767753475 | -0.106260013 | 1.036985370  |
| H  | -0.410627226 | 1.851623385  | -1.942572610 |
| H  | 1.271950565  | 3.682669568  | -2.055442247 |
| H  | 2.678220371  | 4.198934867  | -0.064967428 |
| H  | 2.409257472  | 2.861683667  | 2.017381301  |
| H  | 0.802287012  | 0.969726367  | 2.090584202  |
| H  | -1.259589734 | -2.823270039 | -1.700178690 |
| H  | -3.061560405 | -3.083480656 | -0.004611877 |
| H  | -3.369290922 | -1.354524703 | 1.761064951  |
| H  | -1.906413143 | 0.656365877  | 1.805942815  |
| Bi | 1.155635922  | -0.629936842 | -2.343316680 |
| Cl | 0.830311963  | -2.841416797 | -3.455833973 |
| Cl | 2.879555430  | -1.187529816 | -0.647679742 |



Coordinates of structure 2:

|    |                 |                 |                 |
|----|-----------------|-----------------|-----------------|
| C  | 0.161940613091  | 1.275778410348  | 0.092631867519  |
| C  | 0.383080537943  | 1.954401280542  | -1.123437668849 |
| C  | 1.225386466170  | 3.068449409429  | -1.182488065279 |
| C  | 1.850535719513  | 3.530466634708  | -0.023992317830 |
| C  | 1.621815469055  | 2.879604244469  | 1.192365415271  |
| C  | 0.786871176633  | 1.764049267795  | 1.251316861623  |
| C  | -0.681307379409 | 0.057138373429  | 0.116538826552  |
| C  | -0.420716124932 | -0.981778189740 | -0.796352515607 |
| C  | -1.228317782939 | -2.121596841110 | -0.809807207272 |
| C  | -2.286071042597 | -2.241285151594 | 0.093549240018  |
| C  | -2.531952550184 | -1.223377104710 | 1.020218052052  |
| C  | -1.733281813454 | -0.080830452106 | 1.036356595131  |
| H  | -0.173090665375 | 1.641692389872  | -2.012131215314 |
| H  | 1.374965651343  | 3.585482490543  | -2.130703647468 |
| H  | 2.506211275425  | 4.400312733194  | -0.064941206990 |
| H  | 2.107362954912  | 3.238169309225  | 2.100337095893  |
| H  | 0.629739334555  | 1.244337566976  | 2.197054900740  |
| H  | -1.022131546954 | -2.927890001937 | -1.516464887136 |
| H  | -2.915081325052 | -3.132421239021 | 0.080698695955  |
| H  | -3.356018408575 | -1.317653584764 | 1.728542649651  |
| H  | -1.938438920131 | 0.724016545659  | 1.744851815124  |
| Bi | 1.449594355658  | -0.824359166797 | -2.060455271621 |
| Cl | 0.389599049650  | -1.860572186405 | -4.054021828148 |
| Cl | 2.480582265655  | -2.849707828005 | -1.044962424014 |

Coordinates of structure 3:

|    |                 |                 |                 |
|----|-----------------|-----------------|-----------------|
| C  | 0.151070544897  | 1.261666858010  | 0.090174123225  |
| C  | 0.496764252184  | 1.817865767682  | -1.158599377894 |
| C  | 1.341567598077  | 2.929976496469  | -1.237762008916 |
| C  | 1.837759071291  | 3.515059245468  | -0.073138261391 |
| C  | 1.479185291723  | 2.988054944246  | 1.171782386320  |
| C  | 0.645638137414  | 1.873193917269  | 1.253945166226  |
| C  | -0.672042270243 | 0.030880075137  | 0.154287264724  |
| C  | -0.312627642387 | -1.088585164611 | -0.622919431878 |
| C  | -1.076746740929 | -2.256142182572 | -0.563115531622 |
| C  | -2.198840914891 | -2.319584887308 | 0.265889363801  |
| C  | -2.551042393976 | -1.216850595820 | 1.049255234825  |
| C  | -1.788399379873 | -0.050553009661 | 1.001870274265  |
| H  | 0.041582542275  | 1.419015372230  | -2.069934247343 |
| H  | 1.591365706495  | 3.347322458277  | -2.213422979127 |
| H  | 2.493560041503  | 4.383876674535  | -0.131799274932 |
| H  | 1.861271629869  | 3.443658743932  | 2.085723903039  |
| H  | 0.390256124395  | 1.449627747020  | 2.225986928420  |
| H  | -0.782352621420 | -3.127939725579 | -1.150122874114 |
| H  | -2.795316002091 | -3.231992639290 | 0.305642603583  |
| H  | -3.426854064852 | -1.264698207686 | 1.697420557192  |
| H  | -2.069976660616 | 0.815126201040  | 1.603839592231  |
| Bi | 1.608361626216  | -0.947491148312 | -1.814832270257 |
| Cl | 0.548955629201  | -0.551128892326 | -4.030996011423 |
| Cl | 1.868137805737  | -3.417931138152 | -2.004471368953 |

Coordinates of structure 4:

|    |                 |                 |                 |
|----|-----------------|-----------------|-----------------|
| C  | 0.144230168215  | 1.187584677600  | -0.107335903959 |
| C  | -0.274010319909 | 2.195700276862  | -0.990527198553 |
| C  | 0.451837274752  | 3.380454084482  | -1.108683949486 |
| C  | 1.598126060490  | 3.581426962544  | -0.335607663226 |
| C  | 2.017111115096  | 2.588905785517  | 0.551700281436  |
| C  | 1.297148930625  | 1.399658112625  | 0.661248504429  |
| C  | -0.651499167549 | -0.051674948107 | 0.054994999083  |
| C  | -0.107638480000 | -1.341421607145 | -0.091479928205 |
| C  | -0.912051278830 | -2.462901691407 | 0.160908772193  |
| C  | -2.251775468951 | -2.334728546561 | 0.530461999342  |
| C  | -2.801407849139 | -1.057495618099 | 0.638614282113  |
| C  | -2.008272236998 | 0.065250463844  | 0.405451382290  |
| H  | -1.163762967264 | 2.034247684383  | -1.600300136001 |
| H  | 0.123974947703  | 4.148777449586  | -1.809929432249 |
| H  | 2.164412820995  | 4.508825115058  | -0.426431165582 |
| H  | 2.911609470070  | 2.736505956036  | 1.157266416202  |
| H  | 1.618929837741  | 0.627693342275  | 1.361938653278  |
| H  | -0.507997782115 | -3.477967095664 | 0.041719041803  |
| H  | -2.858999251379 | -3.220054368406 | 0.719451922205  |
| H  | -3.848147501968 | -0.932150240246 | 0.917135719403  |
| H  | -2.433625654715 | 1.063915601339  | 0.517900617672  |
| Bi | 1.839370720818  | -2.162554377867 | -0.906207902526 |
| Cl | 3.371112764757  | -0.267824225624 | -1.298347003620 |
| Cl | 0.962601157555  | -2.407745883025 | -3.209238548042 |

Coordinates of structure 5:

|    |                 |                 |                 |
|----|-----------------|-----------------|-----------------|
| C  | 0.057331811089  | 1.164560262684  | -0.225525953535 |
| C  | -0.501164795580 | 2.232598711226  | -0.946174637722 |
| C  | 0.233863505229  | 3.394724782600  | -1.173974552681 |
| C  | 1.532863741019  | 3.512763161899  | -0.673173852091 |
| C  | 2.091353272392  | 2.461549758527  | 0.055970513371  |
| C  | 1.359772880292  | 1.296057840167  | 0.278327394997  |
| C  | -0.721096154860 | -0.068906538042 | 0.021163054904  |
| C  | -0.193470502203 | -1.357434943103 | -0.200681897651 |
| C  | -0.964536273058 | -2.487438013447 | 0.107631203306  |
| C  | -2.259131069785 | -2.370314948107 | 0.618208495771  |
| C  | -2.793869658129 | -1.096679864758 | 0.811495126661  |
| C  | -2.033850403892 | 0.034368958535  | 0.514802088897  |
| H  | -1.507509145441 | 2.134393067679  | -1.355375529476 |
| H  | -0.205375442613 | 4.209144360948  | -1.751391902638 |
| H  | 2.108376754011  | 4.421323738366  | -0.853639804993 |
| H  | 3.103132705803  | 2.544312263435  | 0.452533388748  |
| H  | 1.796007469108  | 0.481696926074  | 0.857435783638  |
| H  | -0.568108436332 | -3.496756019060 | -0.066953348655 |
| H  | -2.841330112533 | -3.260633944744 | 0.856125375091  |
| H  | -3.803882492917 | -0.980742877771 | 1.205329983506  |
| H  | -2.447456205005 | 1.027830253768  | 0.694478640723  |
| Bi | 1.682568643338  | -2.065786184675 | -1.235345386947 |
| Cl | 3.358607064374  | -1.751523918903 | 0.578137481603  |
| Cl | 2.198180155691  | -0.176679923297 | -2.734697904828 |

Coordinates of structure 6:

|    |                 |                 |                 |
|----|-----------------|-----------------|-----------------|
| C  | 0.033111805721  | 1.222226900289  | -0.300162533469 |
| C  | -0.555534798705 | 2.269482502985  | -1.027638257869 |
| C  | 0.132206087501  | 3.464728895989  | -1.232176174611 |
| C  | 1.411646416483  | 3.636711826278  | -0.697794412768 |
| C  | 2.001387631390  | 2.604957312349  | 0.033941066112  |
| C  | 1.320085131328  | 1.403845349294  | 0.226580129065  |
| C  | -0.708399846971 | -0.031137227461 | -0.031638368915 |
| C  | -0.157260728684 | -1.308160207892 | -0.254844412786 |
| C  | -0.881745449153 | -2.448920376709 | 0.127559271145  |
| C  | -2.147860975035 | -2.349854523577 | 0.706191929890  |
| C  | -2.709578149475 | -1.086347942566 | 0.893897270164  |
| C  | -1.995435277102 | 0.053923804148  | 0.530789719418  |
| H  | -1.553277542093 | 2.134077435686  | -1.447630107837 |
| H  | -0.330349899615 | 4.264449578777  | -1.811883725045 |
| H  | 1.948694666142  | 4.572758926981  | -0.854577537525 |
| H  | 3.000780235923  | 2.729932291888  | 0.450283610997  |
| H  | 1.778489599969  | 0.598341346256  | 0.801824496412  |
| H  | -0.460702352832 | -3.450774990043 | -0.025412172051 |
| H  | -2.687355570357 | -3.248437293036 | 1.005747143698  |
| H  | -3.699609516462 | -0.986125638747 | 1.339237927365  |
| H  | -2.420019990842 | 1.042175407458  | 0.713732543118  |
| Bi | 1.553478577806  | -2.053745571173 | -1.539371934169 |
| Cl | 2.802926438654  | -3.095822658108 | 0.334240745112  |
| Cl | 3.005600816410  | -0.135858239066 | -2.106192455451 |

**RBiBr<sub>2</sub> (R =2-PhC<sub>6</sub>H<sub>4</sub>)**

Coordinates of structure 1:

|    |                 |                 |                 |
|----|-----------------|-----------------|-----------------|
| C  | 0.118529937776  | 1.252792249464  | 0.069154298097  |
| C  | 0.262200590017  | 2.029526682515  | -1.099279761708 |
| C  | 1.176271241533  | 3.088072233745  | -1.150873110244 |
| C  | 1.947495891918  | 3.394344016049  | -0.030462216218 |
| C  | 1.790060626921  | 2.650612977153  | 1.143571569865  |
| C  | 0.885985113336  | 1.591244549217  | 1.194006641803  |
| C  | -0.771914167847 | 0.068278025819  | 0.067011738165  |
| C  | -0.590211521862 | -0.920704668787 | -0.920254050252 |
| C  | -1.418744215977 | -2.044006657297 | -0.943503945002 |
| C  | -2.419115505619 | -2.197493823292 | 0.020584220810  |
| C  | -2.586074170491 | -1.230985669030 | 1.015227599903  |
| C  | -1.763322235807 | -0.104550150348 | 1.043265094751  |
| H  | -0.409877073230 | 1.847672597317  | -1.943017736019 |
| H  | 1.268300657881  | 3.682535881353  | -2.060487696581 |
| H  | 2.663997365268  | 4.215160957888  | -0.066739593267 |
| H  | 2.391656061077  | 2.887862604251  | 2.021415533644  |
| H  | 0.793971191484  | 0.988356640626  | 2.097684862074  |
| H  | -1.268556625971 | -2.816543177304 | -1.700630008765 |
| H  | -3.062388413462 | -3.078380198178 | 0.000431403449  |
| H  | -3.362855180014 | -1.352939799948 | 1.771338701737  |
| H  | -1.900009780003 | 0.658097866968  | 1.812556909432  |
| Bi | 1.165587524618  | -0.613937976077 | -2.330458542764 |
| Br | 0.786702820453  | -2.896060095487 | -3.643950528565 |
| Br | 2.983587178000  | -1.296528156618 | -0.531887624346 |

Coordinates of structure 2:

|    |                 |                 |                 |
|----|-----------------|-----------------|-----------------|
| C  | 0.144892070747  | 1.279235293153  | 0.080507410824  |
| C  | 0.341245869769  | 1.987601996761  | -1.123113434180 |
| C  | 1.198794282340  | 3.090933819799  | -1.176442560184 |
| C  | 1.864549240889  | 3.510492393473  | -0.024681452619 |
| C  | 1.660787401817  | 2.829861473167  | 1.179908332380  |
| C  | 0.810746007195  | 1.725602826386  | 1.233147472037  |
| C  | -0.709351186320 | 0.067479382582  | 0.097590828347  |
| C  | -0.453789316506 | -0.970281481303 | -0.818344882416 |
| C  | -1.259592851835 | -2.110838158509 | -0.826359713044 |
| C  | -2.308285311054 | -2.233874161989 | 0.087434731185  |
| C  | -2.550313004390 | -1.216544900441 | 1.015254765633  |
| C  | -1.753760172841 | -0.072228963186 | 1.024895188767  |
| H  | -0.246044594352 | 1.708233594735  | -2.002744969055 |
| H  | 1.329645208783  | 3.631476803028  | -2.114286189497 |
| H  | 2.533454706814  | 4.370433198810  | -0.061256287757 |
| H  | 2.179162258238  | 3.155077610166  | 2.082267536785  |
| H  | 0.674202578801  | 1.180672234957  | 2.167705918556  |
| H  | -1.061955432800 | -2.912961260741 | -1.540165763021 |
| H  | -2.934723581799 | -3.126890939281 | 0.079323837685  |
| H  | -3.368630904145 | -1.312621601769 | 1.729969148980  |
| H  | -1.953097793932 | 0.731498877806  | 1.736342625908  |
| Bi | 1.391696431099  | -0.751726381882 | -2.116567225575 |
| Br | 0.389246065620  | -2.180615035149 | -4.113171820231 |
| Br | 2.762399337864  | -2.577589710574 | -0.762509739509 |

Coordinates of structure 3:

|    |                 |                 |                 |
|----|-----------------|-----------------|-----------------|
| C  | 0.145142574176  | 1.271350712340  | 0.099011229565  |
| C  | 0.464908326834  | 1.832481592830  | -1.155456444454 |
| C  | 1.302885448004  | 2.948745823327  | -1.247916729755 |
| C  | 1.818976813041  | 3.531946590790  | -0.090957365907 |
| C  | 1.486522440965  | 3.000073149795  | 1.159191937269  |
| C  | 0.658808083696  | 1.881685847717  | 1.254648026926  |
| C  | -0.672409132300 | 0.037291506861  | 0.167432662699  |
| C  | -0.322399219446 | -1.069105799977 | -0.631866651985 |
| C  | -1.094553848883 | -2.232052824319 | -0.592903371750 |
| C  | -2.213763172554 | -2.303213275017 | 0.239107293294  |
| C  | -2.552779732334 | -1.215528375684 | 1.049473559865  |
| C  | -1.783337681894 | -0.053307472338 | 1.021168962575  |
| H  | -0.008172420701 | 1.433763765954  | -2.058145241965 |
| H  | 1.532548809139  | 3.370167467444  | -2.226761638957 |
| H  | 2.470165010731  | 4.403448481486  | -0.159601459605 |
| H  | 1.884774635170  | 3.454652402386  | 2.066684206632  |
| H  | 0.423586171400  | 1.454421912259  | 2.230162525804  |
| H  | -0.809215372070 | -3.096096606610 | -1.195453523178 |
| H  | -2.817330446267 | -3.211529917677 | 0.262177631335  |
| H  | -3.424457495385 | -1.271865510543 | 1.702471979967  |
| H  | -2.056528000665 | 0.802823955620  | 1.640498553336  |
| Bi | 1.624884150126  | -0.905047947818 | -1.778785268081 |
| Br | 0.523634417945  | -0.743991402561 | -4.184782267638 |
| Br | 2.099386951271  | -3.518687166266 | -1.734694845993 |



Coordinates of structure 4:

|    |                 |                 |                 |
|----|-----------------|-----------------|-----------------|
| C  | 0.138702972984  | 1.180936876138  | -0.113258288722 |
| C  | -0.263996477602 | 2.133686644078  | -1.061939295170 |
| C  | 0.443098354756  | 3.326404738148  | -1.211939364300 |
| C  | 1.551735101921  | 3.591106615101  | -0.404189314212 |
| C  | 1.953445726840  | 2.653863926061  | 0.548649592718  |
| C  | 1.255100795505  | 1.454578030583  | 0.688268704890  |
| C  | -0.642711477475 | -0.064115316251 | 0.081969152977  |
| C  | -0.098294697521 | -1.351942276264 | -0.072034140159 |
| C  | -0.892519342279 | -2.475409547379 | 0.204007371376  |
| C  | -2.222920680850 | -2.349753314982 | 0.606299975163  |
| C  | -2.773963121603 | -1.074001483560 | 0.724016108230  |
| C  | -1.990313399530 | 0.050129066160  | 0.466045891571  |
| H  | -1.126656703521 | 1.923361363308  | -1.695368305600 |
| H  | 0.128970571040  | 4.051458984549  | -1.963732760296 |
| H  | 2.102474589569  | 4.525146901717  | -0.518692418194 |
| H  | 2.819694123457  | 2.850730657525  | 1.180865982398  |
| H  | 1.565935071605  | 0.723260499653  | 1.435822980545  |
| H  | -0.487413003075 | -3.489361842145 | 0.079921822473  |
| H  | -2.822116184203 | -3.236571457431 | 0.812995666077  |
| H  | -3.813818405536 | -0.950864347758 | 1.027891869758  |
| H  | -2.415609657339 | 1.048364285660  | 0.581977584982  |
| Bi | 1.837450659447  | -2.172336954539 | -0.915793277025 |
| Br | 3.534557673369  | -0.193869530759 | -1.267140654149 |
| Br | 0.900444820041  | -2.352375607613 | -3.379941125331 |

Coordinates of structure 5:

|    |                 |                 |                 |
|----|-----------------|-----------------|-----------------|
| C  | 0.032594570915  | 1.165892199515  | -0.247465484574 |
| C  | -0.552290804218 | 2.204874515549  | -0.988949836210 |
| C  | 0.155180191274  | 3.378587766368  | -1.243243288371 |
| C  | 1.451435887701  | 3.537832870726  | -0.746938215366 |
| C  | 2.035209598813  | 2.516456003654  | 0.004441304404  |
| C  | 1.332000536278  | 1.338571635610  | 0.251297730881  |
| C  | -0.715186374827 | -0.080010593298 | 0.030169110229  |
| C  | -0.163639710977 | -1.360820329175 | -0.176008098035 |
| C  | -0.902515943599 | -2.500759242551 | 0.172747879131  |
| C  | -2.188845048400 | -2.400722297008 | 0.707008146505  |
| C  | -2.748697384977 | -1.135481236477 | 0.883635859036  |
| C  | -2.019993603682 | 0.005064137985  | 0.547733419385  |
| H  | -1.557105292826 | 2.074332106045  | -1.392827772202 |
| H  | -0.303797953360 | 4.169989259933  | -1.837085751012 |
| H  | 2.005012001761  | 4.455635281020  | -0.947844636514 |
| H  | 3.045257064097  | 2.631971535217  | 0.397366103123  |
| H  | 1.787612833405  | 0.545946316094  | 0.845630197180  |
| H  | -0.486143581374 | -3.504484694551 | 0.013886164836  |
| H  | -2.745070834994 | -3.298520898881 | 0.976684928931  |
| H  | -3.752793562430 | -1.033393460012 | 1.295866411845  |
| H  | -2.451022789452 | 0.993150717132  | 0.715713918063  |
| Bi | 1.701311806393  | -2.061967599465 | -1.237096157422 |
| Br | 3.495024321147  | -1.756549853385 | 0.696379000396  |
| Br | 2.227741383330  | -0.083167230049 | -2.886397174243 |

Coordinates of structure 6:

|    |                 |                 |                 |
|----|-----------------|-----------------|-----------------|
| C  | 0.003345279263  | 1.220290538661  | -0.323161018780 |
| C  | -0.606207413928 | 2.236475781583  | -1.076210185384 |
| C  | 0.054025071761  | 3.443252803660  | -1.303088042971 |
| C  | 1.324964040555  | 3.658454411717  | -0.764300386768 |
| C  | 1.935440526898  | 2.657358835519  | -0.007407590980 |
| C  | 1.283050439205  | 1.443735582493  | 0.205631744849  |
| C  | -0.706826430987 | -0.043449051373 | -0.021550909942 |
| C  | -0.118809717777 | -1.310717846372 | -0.203252687916 |
| C  | -0.805537060100 | -2.457988907232 | 0.227918907254  |
| C  | -2.069735089212 | -2.374556095995 | 0.813251957461  |
| C  | -2.669375792826 | -1.122701838328 | 0.956725308358  |
| C  | -1.992239914564 | 0.024177697711  | 0.546600681905  |
| H  | -1.598252517917 | 2.068025012766  | -1.497777037688 |
| H  | -0.424080130973 | 4.218710214141  | -1.902790214323 |
| H  | 1.839288164856  | 4.604232300500  | -0.937538959392 |
| H  | 2.928880538386  | 2.816269807197  | 0.411731396831  |
| H  | 1.757440104081  | 0.660566698927  | 0.798834325460  |
| H  | -0.354587294015 | -3.451045303715 | 0.108508298433  |
| H  | -2.578538778455 | -3.277168631979 | 1.151882227408  |
| H  | -3.659247913495 | -1.036021755171 | 1.405174507408  |
| H  | -2.444186538385 | 1.005713175192  | 0.697485350539  |
| Bi | 1.553529224677  | -2.050151932700 | -1.542044291006 |
| Br | 2.993433053686  | -3.114736867164 | 0.407846913218  |
| Br | 3.035505459264  | -0.016297720040 | -2.317766533975 |

**RBiI<sub>2</sub> (R =2-PhC<sub>6</sub>H<sub>4</sub>)**

Coordinates of structure 1:

|    |                 |                 |                 |
|----|-----------------|-----------------|-----------------|
| C  | 0.113105137559  | 1.259235062587  | 0.069074932068  |
| C  | 0.259847717264  | 2.035185893102  | -1.099538854132 |
| C  | 1.176065863645  | 3.092108837201  | -1.149746541282 |
| C  | 1.944778135548  | 3.398334191229  | -0.027727589948 |
| C  | 1.782470878144  | 2.656960073696  | 1.147078484843  |
| C  | 0.876932125590  | 1.598918158539  | 1.195988743298  |
| C  | -0.777180288886 | 0.074864462107  | 0.067199048491  |
| C  | -0.596967366003 | -0.918165221282 | -0.917061645907 |
| C  | -1.426597475434 | -2.040715704021 | -0.932383437558 |
| C  | -2.424895906631 | -2.190343157687 | 0.034228724125  |
| C  | -2.590726968201 | -1.219883389240 | 1.024987308012  |
| C  | -1.767677814472 | -0.093808591558 | 1.045325807491  |
| H  | -0.411642929952 | 1.855190210163  | -1.943980924599 |
| H  | 1.271331882522  | 3.685454062123  | -2.059714289361 |
| H  | 2.663065424163  | 4.217612314437  | -0.063325207634 |
| H  | 2.381921653993  | 2.894322326520  | 2.026305849768  |
| H  | 0.782190618895  | 0.996568665239  | 2.099669964803  |
| H  | -1.281786661057 | -2.816054558502 | -1.687956989308 |
| H  | -3.068111990349 | -3.071399780849 | 0.018191931053  |
| H  | -3.366022274788 | -1.338198966148 | 1.783170361874  |
| H  | -1.902484695996 | 0.672996429998  | 1.810818708758  |
| Bi | 1.153642211814  | -0.598883662288 | -2.341545184917 |
| I  | 0.741461510125  | -3.018027953935 | -3.850500440320 |
| I  | 3.148558522505  | -1.329842791430 | -0.413854999621 |

Coordinates of structure 2:

|    |                 |                 |                 |
|----|-----------------|-----------------|-----------------|
| C  | 0.141711311084  | 1.286065320487  | 0.078945704926  |
| C  | 0.337911143147  | 1.986202024250  | -1.129864982091 |
| C  | 1.189196164898  | 3.094096202913  | -1.188869102714 |
| C  | 1.848158608718  | 3.526780946603  | -0.038112950464 |
| C  | 1.644532100684  | 2.854248005250  | 1.171079514222  |
| C  | 0.800744272576  | 1.745424470955  | 1.230208818828  |
| C  | -0.707977300151 | 0.071595311722  | 0.101934547826  |
| C  | -0.448442255573 | -0.971946380618 | -0.806175099578 |
| C  | -1.253014917448 | -2.113082563907 | -0.808004618073 |
| C  | -2.303706932875 | -2.231667232795 | 0.103771288596  |
| C  | -2.549823893547 | -1.208792536245 | 1.024543318830  |
| C  | -1.754839051451 | -0.063727300976 | 1.027686065425  |
| H  | -0.245115342969 | 1.696627776483  | -2.009005996256 |
| H  | 1.320240504534  | 3.627753349986  | -2.130603346805 |
| H  | 2.511817744442  | 4.390576401502  | -0.079131150801 |
| H  | 2.157675251164  | 3.189812109081  | 2.072634748557  |
| H  | 0.664538457301  | 1.206943316436  | 2.168550339515  |
| H  | -1.053806530269 | -2.919660228492 | -1.516429063256 |
| H  | -2.928976225357 | -3.125575628570 | 0.099327110327  |
| H  | -3.369575843074 | -1.301269505958 | 1.738075031001  |
| H  | -1.956903612738 | 0.745239081500  | 1.732421523460  |
| Bi | 1.411537263372  | -0.746739601949 | -2.090456927888 |
| I  | 0.336327735259  | -2.218100405855 | -4.309731496700 |
| I  | 2.889068658272  | -2.718376021803 | -0.608089516887 |

Coordinates of structure 3:

|    |                 |                 |                 |
|----|-----------------|-----------------|-----------------|
| C  | 0.135337882079  | 1.282811364237  | 0.089714163836  |
| C  | 0.455488914490  | 1.837660431571  | -1.166966881705 |
| C  | 1.288538949327  | 2.957176203318  | -1.263478215894 |
| C  | 1.797542216043  | 3.550531395998  | -0.108608506730 |
| C  | 1.463269635540  | 3.025274430051  | 1.143816390928  |
| C  | 0.641025781510  | 1.903036637893  | 1.243401537518  |
| C  | -0.675278078989 | 0.043802468053  | 0.165655296666  |
| C  | -0.300051238644 | -1.081079902996 | -0.595707931673 |
| C  | -1.064588194183 | -2.248128811048 | -0.539867213516 |
| C  | -2.196975522312 | -2.307914640343 | 0.274799847456  |
| C  | -2.561505330715 | -1.201792917027 | 1.047881804835  |
| C  | -1.801434297187 | -0.034170548183 | 1.000585890839  |
| H  | -0.009504175891 | 1.428859016365  | -2.069253818101 |
| H  | 1.520309996371  | 3.372415524170  | -2.244543631584 |
| H  | 2.444950458652  | 4.424625953334  | -0.180488175683 |
| H  | 1.855770156230  | 3.487946244596  | 2.049741734222  |
| H  | 0.404250974807  | 1.480697925186  | 2.220702026160  |
| H  | -0.764455754434 | -3.125607875359 | -1.115424035093 |
| H  | -2.792081328987 | -3.221384229399 | 0.311210765923  |
| H  | -3.444416774988 | -1.247913630997 | 1.686378094084  |
| H  | -2.091700698034 | 0.836284171489  | 1.591395797796  |
| Bi | 1.649934841195  | -0.905026811385 | -1.747476354640 |
| I  | 0.444785139083  | -0.748172818666 | -4.350912877505 |
| I  | 2.282063759038  | -3.707502670859 | -1.607851948137 |

Coordinates of structure 4:

|    |                 |                 |                 |
|----|-----------------|-----------------|-----------------|
| C  | 0.134626870410  | 1.187733171369  | -0.121465893324 |
| C  | -0.213041635607 | 2.084947165299  | -1.141825915992 |
| C  | 0.478781380853  | 3.286882581860  | -1.292871123024 |
| C  | 1.512612387523  | 3.617388836245  | -0.413451133435 |
| C  | 1.857970652501  | 2.735265451408  | 0.611661098632  |
| C  | 1.179038547728  | 1.525033392007  | 0.750574156980  |
| C  | -0.631322386183 | -0.066889346443 | 0.082759401716  |
| C  | -0.063096464150 | -1.347734830040 | -0.032040359602 |
| C  | -0.837639006334 | -2.476345441725 | 0.279539751488  |
| C  | -2.167709755980 | -2.358834705242 | 0.683040917790  |
| C  | -2.744501556433 | -1.090628394501 | 0.756959378400  |
| C  | -1.981189485123 | 0.037827341022  | 0.461951738772  |
| H  | -1.020213025561 | 1.825276171612  | -1.828125672367 |
| H  | 0.209587174784  | 3.969074087603  | -2.100193492786 |
| H  | 2.048415628101  | 4.559992743985  | -0.527749009358 |
| H  | 2.665278445771  | 2.984468087482  | 1.301183832024  |
| H  | 1.442657109290  | 0.836123939288  | 1.554810795883  |
| H  | -0.418106419474 | -3.485013259641 | 0.176791352198  |
| H  | -2.750183081697 | -3.249399435195 | 0.919744409450  |
| H  | -3.787233053376 | -0.977397991819 | 1.054711757371  |
| H  | -2.422908677645 | 1.032313075243  | 0.544379581799  |
| Bi | 1.913354855239  | -2.103734273413 | -0.862343191658 |
| I  | 3.507776887812  | 0.125519096995  | -1.640033272830 |
| I  | 0.768321917550  | -2.849440553399 | -3.383305348126 |

Coordinates of structure 5:

|    |                 |                 |                 |
|----|-----------------|-----------------|-----------------|
| C  | 0.018932956756  | 1.156209046646  | -0.246352412118 |
| C  | -0.575084780026 | 2.125200742546  | -1.070444534698 |
| C  | 0.107739470464  | 3.297593027437  | -1.389855243636 |
| C  | 1.388149014827  | 3.525464736899  | -0.879371835823 |
| C  | 1.978341599233  | 2.576179223780  | -0.043520187111 |
| C  | 1.298213607945  | 1.400731141859  | 0.270702298478  |
| C  | -0.701149303522 | -0.093687812640 | 0.085058970534  |
| C  | -0.137560954746 | -1.373918999758 | -0.090617662001 |
| C  | -0.871643091429 | -2.512398478948 | 0.273284522635  |
| C  | -2.165064181577 | -2.412272226745 | 0.790360994749  |
| C  | -2.734476215341 | -1.148448624600 | 0.942398755783  |
| C  | -2.010328466869 | -0.009500946407 | 0.591521969565  |
| H  | -1.565285254598 | 1.937633606112  | -1.487550119294 |
| H  | -0.357367550757 | 4.033170915594  | -2.047388379149 |
| H  | 1.923014508833  | 4.441033642071  | -1.133602860669 |
| H  | 2.975154188724  | 2.745651308356  | 0.363921002805  |
| H  | 1.758117744736  | 0.667304519513  | 0.932461699208  |
| H  | -0.443783510821 | -3.514931478580 | 0.141422225839  |
| H  | -2.717973392754 | -3.309750730989 | 1.067967681245  |
| H  | -3.742502863626 | -1.045715925148 | 1.344755158642  |
| H  | -2.451811111759 | 0.978431264976  | 0.731414339649  |
| Bi | 1.779017882000  | -2.086967487059 | -1.062359747466 |
| I  | 3.816328341550  | -1.435228552990 | 0.863304130149  |
| I  | 2.112298672758  | -0.139355001924 | -3.112807007315 |



Coordinates of structure 6:

|    |                 |                 |                 |
|----|-----------------|-----------------|-----------------|
| C  | -0.001934062045 | 1.225528205445  | -0.323577858753 |
| C  | -0.475568620928 | 1.962721063409  | -1.417408318294 |
| C  | 0.114703592870  | 3.180453460161  | -1.760082624891 |
| C  | 1.173646464202  | 3.682561665452  | -1.001686566956 |
| C  | 1.646062537851  | 2.957591750900  | 0.093568938238  |
| C  | 1.068348276727  | 1.732482235841  | 0.424878992596  |
| C  | -0.659349258683 | -0.046907538150 | 0.084156425206  |
| C  | -0.151328707461 | -1.316963128663 | -0.242550993097 |
| C  | -0.809648666643 | -2.465616405235 | 0.227874942237  |
| C  | -1.974494312607 | -2.369249751227 | 0.989547136531  |
| C  | -2.491828379593 | -1.110359450457 | 1.295624096589  |
| C  | -1.835494086863 | 0.035456979180  | 0.848592074728  |
| H  | -1.315361959254 | 1.576886494413  | -1.998021609028 |
| H  | -0.257822442478 | 3.740256456175  | -2.618644011837 |
| H  | 1.631199139391  | 4.635995548934  | -1.265850193770 |
| H  | 2.480570454066  | 3.338335858052  | 0.683053654681  |
| H  | 1.443079525203  | 1.158422636167  | 1.272801360445  |
| H  | -0.405709038327 | -3.458520612326 | 0.010874931101  |
| H  | -2.468906111894 | -3.273166093542 | 1.346270722265  |
| H  | -3.401273734573 | -1.017770589354 | 1.890158566024  |
| H  | -2.226018675962 | 1.022571680236  | 1.100651138564  |
| Bi | 1.437704528517  | -1.854910852554 | -1.784437765312 |
| I  | 2.778730320190  | -3.764016472404 | -0.119267739845 |
| I  | 3.381970528296  | 0.230643769545  | -1.901821537423 |

Selected geometries from potential energy surface of halogen substituted R<sub>2</sub>BiX compounds along the C-C-C-C dihedral scan.

**RBiCl<sub>2</sub> (R =2-PhC<sub>6</sub>H<sub>4</sub>)**

Coordinates of structure 1:

|    |              |              |              |
|----|--------------|--------------|--------------|
| C  | 0.120020090  | 1.247940601  | 0.066203983  |
| C  | 0.262380137  | 2.029158668  | -1.098691705 |
| C  | 1.180857834  | 3.083771341  | -1.148595617 |
| C  | 1.958176773  | 3.381142116  | -0.029812365 |
| C  | 1.802690526  | 2.631981855  | 1.140890100  |
| C  | 0.893494471  | 1.576885567  | 1.189671744  |
| C  | -0.773952488 | 0.065657604  | 0.063051402  |
| C  | -0.589279619 | -0.924281620 | -0.921997382 |
| C  | -1.415802292 | -2.049240581 | -0.945989259 |
| C  | -2.419267897 | -2.201855692 | 0.015251930  |
| C  | -2.590024056 | -1.233317815 | 1.007365537  |
| C  | -1.767753475 | -0.106260013 | 1.036985370  |
| H  | -0.410627226 | 1.851623385  | -1.942572610 |
| H  | 1.271950565  | 3.682669568  | -2.055442247 |
| H  | 2.678220371  | 4.198934867  | -0.064967428 |
| H  | 2.409257472  | 2.861683667  | 2.017381301  |
| H  | 0.802287012  | 0.969726367  | 2.090584202  |
| H  | -1.259589734 | -2.823270039 | -1.700178690 |
| H  | -3.061560405 | -3.083480656 | -0.004611877 |
| H  | -3.369290922 | -1.354524703 | 1.761064951  |
| H  | -1.906413143 | 0.656365877  | 1.805942815  |
| Bi | 1.155635922  | -0.629936842 | -2.343316680 |
| Cl | 0.830311963  | -2.841416797 | -3.455833973 |
| Cl | 2.879555430  | -1.187529816 | -0.647679742 |

Coordinates of structure 2:

|    |                 |                 |                 |
|----|-----------------|-----------------|-----------------|
| C  | 0.108927764875  | 1.265894900835  | 0.062615446466  |
| C  | -0.011471182550 | 2.232515076596  | -0.953334396597 |
| C  | 0.885612805120  | 3.301356109407  | -1.030357972449 |
| C  | 1.915786513834  | 3.417178109837  | -0.094839480638 |
| C  | 2.048249149273  | 2.460432240952  | 0.914102654812  |
| C  | 1.152651296086  | 1.391965701297  | 0.994027824229  |
| C  | -0.792777551159 | 0.076093950027  | 0.076939627653  |
| C  | -0.467314636604 | -1.002276064022 | -0.763753944384 |
| C  | -1.279744731371 | -2.136729428249 | -0.804637705456 |
| C  | -2.418633923255 | -2.201460725841 | 0.002393622655  |
| C  | -2.743058257589 | -1.133736486453 | 0.843966928794  |
| C  | -1.934033454660 | 0.004528057933  | 0.884590768337  |
| H  | -0.823738626844 | 2.142122636466  | -1.677356199275 |
| H  | 0.776104875120  | 4.045040340524  | -1.820705002318 |
| H  | 2.618674517926  | 4.248720372368  | -0.155387740125 |
| H  | 2.858133579212  | 2.539852642448  | 1.640011718065  |
| H  | 1.271353012862  | 0.631288042930  | 1.766034687896  |
| H  | -1.020672455534 | -2.968847511363 | -1.462001395969 |
| H  | -3.054834813526 | -3.087357454590 | -0.024917007311 |
| H  | -3.634042404359 | -1.185529659768 | 1.470808104721  |
| H  | -2.189012272059 | 0.841098103519  | 1.537346708599  |
| Bi | 1.428373962065  | -0.698114257197 | -1.952289942838 |
| Cl | 1.053800652757  | -2.697788789891 | -3.382193377464 |
| Cl | 2.932943490379  | -1.683818997765 | -0.236360167403 |

Coordinates of structure 3:

|    |                 |                 |                 |
|----|-----------------|-----------------|-----------------|
| C  | 0.110932240797  | 1.294878453839  | -0.011498914245 |
| C  | -0.329558373323 | 2.532199098745  | -0.510199025153 |
| C  | 0.532235450957  | 3.627628742563  | -0.554482610481 |
| C  | 1.851134614371  | 3.511235769275  | -0.103128185045 |
| C  | 2.299907330540  | 2.293757727218  | 0.408756402690  |
| C  | 1.435155533674  | 1.195343031577  | 0.463428004359  |
| C  | -0.767370126168 | 0.101189761337  | -0.016931534316 |
| C  | -0.295823374333 | -1.108615140981 | -0.564568713375 |
| C  | -1.111475624979 | -2.242268477594 | -0.563043389384 |
| C  | -2.397814807428 | -2.181085540106 | -0.022764922552 |
| C  | -2.878202841644 | -0.977923620267 | 0.502054764242  |
| C  | -2.072221876493 | 0.159675053934  | 0.498355114184  |
| H  | -1.348968657164 | 2.619974621110  | -0.887633396324 |
| H  | 0.176734423605  | 4.577748762563  | -0.954588236833 |
| H  | 2.521251719060  | 4.370129969651  | -0.145001983496 |
| H  | 3.317153448968  | 2.196997356238  | 0.788414338519  |
| H  | 1.764960898636  | 0.270979806416  | 0.947103081931  |
| H  | -0.749346310166 | -3.171832770513 | -1.005316466085 |
| H  | -3.028654243806 | -3.070977732412 | -0.018950937627 |
| H  | -3.883683003812 | -0.927416397411 | 0.920676358235  |
| H  | -2.439838158264 | 1.095352109348  | 0.922697345647  |
| Bi | 1.734743425696  | -1.071192425790 | -1.567102790501 |
| Cl | 1.263111922059  | -3.084909718531 | -2.955031527136 |
| Cl | 2.976913699217  | -2.208441530207 | 0.263460982747  |

Coordinates of structure 4:

|    |                 |                 |                 |
|----|-----------------|-----------------|-----------------|
| C  | 0.163267568262  | 1.283463347131  | 0.144287725755  |
| C  | -0.380340074441 | 2.583306884715  | 0.208442927537  |
| C  | 0.410766989442  | 3.720505512208  | 0.061753660852  |
| C  | 1.782809583853  | 3.613011296554  | -0.177082002353 |
| C  | 2.357954798847  | 2.344140160585  | -0.207346336942 |
| C  | 1.559679054731  | 1.210926561953  | -0.047035747672 |
| C  | -0.707970124651 | 0.078656314851  | 0.060365231430  |
| C  | -0.212358214432 | -1.204265638558 | -0.308018921629 |
| C  | -1.084538302074 | -2.297705608001 | -0.369963632679 |
| C  | -2.457795683602 | -2.146257021725 | -0.176016344212 |
| C  | -2.971974229040 | -0.864233714520 | 0.009654019325  |
| C  | -2.110084892494 | 0.224722106592  | 0.101341575869  |
| H  | -1.449225376723 | 2.724380547589  | 0.356445735311  |
| H  | -0.056429392558 | 4.704394909680  | 0.119498608275  |
| H  | 2.395671556911  | 4.504916528840  | -0.305266413286 |
| H  | 3.436300242612  | 2.226509650925  | -0.319576080870 |
| H  | 2.085910831188  | 0.276726539509  | 0.178570657127  |
| H  | -0.692814370687 | -3.281531075278 | -0.634585917392 |
| H  | -3.118381156462 | -3.012281856181 | -0.226513072663 |
| H  | -4.048590984411 | -0.703881671017 | 0.080676002751  |
| H  | -2.550615780085 | 1.205025003204  | 0.274359400992  |
| Bi | 1.769970202162  | -1.498722428800 | -1.390977988651 |
| Cl | 1.330452602024  | -3.833536989505 | -2.143681023315 |
| Cl | 3.229612461627  | -2.055842450750 | 0.545371696442  |

**RBiBr<sub>2</sub> ( R = 2-PhC<sub>6</sub>H<sub>4</sub>)**

Coordinates of structure 1:

|    |                 |                 |                 |
|----|-----------------|-----------------|-----------------|
| C  | 0.118529937776  | 1.252792249464  | 0.069154298097  |
| C  | 0.262200590017  | 2.029526682515  | -1.099279761708 |
| C  | 1.176271241533  | 3.088072233745  | -1.150873110244 |
| C  | 1.947495891918  | 3.394344016049  | -0.030462216218 |
| C  | 1.790060626921  | 2.650612977153  | 1.143571569865  |
| C  | 0.885985113336  | 1.591244549217  | 1.194006641803  |
| C  | -0.771914167847 | 0.068278025819  | 0.067011738165  |
| C  | -0.590211521862 | -0.920704668787 | -0.920254050252 |
| C  | -1.418744215977 | -2.044006657297 | -0.943503945002 |
| C  | -2.419115505619 | -2.197493823292 | 0.020584220810  |
| C  | -2.586074170491 | -1.230985669030 | 1.015227599903  |
| C  | -1.763322235807 | -0.104550150348 | 1.043265094751  |
| H  | -0.409877073230 | 1.847672597317  | -1.943017736019 |
| H  | 1.268300657881  | 3.682535881353  | -2.060487696581 |
| H  | 2.663997365268  | 4.215160957888  | -0.066739593267 |
| H  | 2.391656061077  | 2.887862604251  | 2.021415533644  |
| H  | 0.793971191484  | 0.988356640626  | 2.097684862074  |
| H  | -1.268556625971 | -2.816543177304 | -1.700630008765 |
| H  | -3.062388413462 | -3.078380198178 | 0.000431403449  |
| H  | -3.362855180014 | -1.352939799948 | 1.771338701737  |
| H  | -1.900009780003 | 0.658097866968  | 1.812556909432  |
| Bi | 1.165587524618  | -0.613937976077 | -2.330458542764 |
| Br | 0.786702820453  | -2.896060095487 | -3.643950528565 |
| Br | 2.983587178000  | -1.296528156618 | -0.531887624346 |

Coordinates of structure 2:

|    |                 |                 |                 |
|----|-----------------|-----------------|-----------------|
| C  | 0.103542714214  | 1.274658985981  | 0.065200509104  |
| C  | -0.015851922347 | 2.234071197473  | -0.958147803211 |
| C  | 0.878969549064  | 3.304353977043  | -1.039664827242 |
| C  | 1.906235721120  | 3.428779620741  | -0.101913846604 |
| C  | 2.037466936775  | 2.479881834845  | 0.914521807413  |
| C  | 1.143543465530  | 1.410184684439  | 0.999813043259  |
| C  | -0.793974267683 | 0.081814137029  | 0.082693571722  |
| C  | -0.465938244964 | -0.996149580059 | -0.757829748654 |
| C  | -1.275585338869 | -2.132382976325 | -0.797209985044 |
| C  | -2.412120746294 | -2.200602912253 | 0.012582768178  |
| C  | -2.737856552177 | -1.134353839330 | 0.855586767912  |
| C  | -1.932825557376 | 0.006645972510  | 0.893354873429  |
| H  | -0.825469539274 | 2.136296768089  | -1.684108419092 |
| H  | 0.770211213120  | 4.042193358639  | -1.835538997623 |
| H  | 2.607723915226  | 4.261170491390  | -0.166574228694 |
| H  | 2.844839961288  | 2.566495646496  | 1.642393912383  |
| H  | 1.260248182901  | 0.656557158504  | 1.779046144466  |
| H  | -1.017162223521 | -2.964093719265 | -1.455508763740 |
| H  | -3.045385516691 | -3.088608828908 | -0.013570699622 |
| H  | -3.626647487512 | -1.189437961010 | 1.485213245185  |
| H  | -2.188919773336 | 0.842976271369  | 1.545977970360  |
| Bi | 1.442110426705  | -0.676056705783 | -1.925887425933 |
| Br | 1.021346920455  | -2.702598920168 | -3.580871698415 |
| Br | 3.002775473647  | -1.839367751448 | -0.124854409537 |

Coordinates of structure 3:

|    |                 |                 |                 |
|----|-----------------|-----------------|-----------------|
| C  | 0.104354221902  | 1.301638109509  | -0.005096318212 |
| C  | -0.332696344078 | 2.533367466800  | -0.519959601998 |
| C  | 0.529658808771  | 3.628300535302  | -0.569504500130 |
| C  | 1.845190319347  | 3.516919050143  | -0.106999135443 |
| C  | 2.290316589575  | 2.305335212646  | 0.421618377954  |
| C  | 1.425067457327  | 1.207495621234  | 0.481087405693  |
| C  | -0.771096536060 | 0.105527893849  | -0.007600653574 |
| C  | -0.295516362881 | -1.104600547914 | -0.551511872084 |
| C  | -1.107184458643 | -2.240884657455 | -0.544482522947 |
| C  | -2.393513994100 | -2.181823898208 | -0.004263088654 |
| C  | -2.878875086510 | -0.977860098377 | 0.514245980041  |
| C  | -2.076631861742 | 0.162238321603  | 0.505896898815  |
| H  | -1.349047949763 | 2.616764737465  | -0.906474474535 |
| H  | 0.177437966897  | 4.573915301655  | -0.982907088065 |
| H  | 2.515708736979  | 4.375251653361  | -0.153687259509 |
| H  | 3.304858445364  | 2.212330705021  | 0.809301992805  |
| H  | 1.750987128208  | 0.288052927788  | 0.977007542834  |
| H  | -0.743526056761 | -3.171825111172 | -0.982838028954 |
| H  | -3.020937670128 | -3.074071285439 | 0.003425732774  |
| H  | -3.885038542783 | -0.928758936327 | 0.931319831996  |
| H  | -2.447405244472 | 1.098990766249  | 0.925127957685  |
| Bi | 1.731483594641  | -1.033757222672 | -1.563176859628 |
| Br | 1.234501352294  | -3.091697145899 | -3.165709581282 |
| Br | 3.073182796618  | -2.318422489163 | 0.329883024418  |



Coordinates of structure 4:

|    |                 |                 |                 |
|----|-----------------|-----------------|-----------------|
| C  | 0.155633071390  | 1.290909706820  | 0.146676196202  |
| C  | -0.387460909698 | 2.591196389222  | 0.205556158391  |
| C  | 0.406373867168  | 3.726968867026  | 0.062839388320  |
| C  | 1.780059084132  | 3.617439765231  | -0.166650917787 |
| C  | 2.354143637665  | 2.348103227374  | -0.193153730480 |
| C  | 1.552899071512  | 1.216475821677  | -0.036502525177 |
| C  | -0.713522516452 | 0.085404934668  | 0.062410195438  |
| C  | -0.215622175654 | -1.197476046322 | -0.304949464049 |
| C  | -1.084771941422 | -2.293348348719 | -0.357100513608 |
| C  | -2.457875047966 | -2.144318580579 | -0.161586125770 |
| C  | -2.975442018863 | -0.862512404792 | 0.016952680385  |
| C  | -2.115991014458 | 0.228581381927  | 0.103957880502  |
| H  | -1.457211776112 | 2.733277882185  | 0.346300252677  |
| H  | -0.059689846269 | 4.711633599490  | 0.116204288628  |
| H  | 2.394760975340  | 4.508623141693  | -0.290955111069 |
| H  | 3.432953232268  | 2.228602361302  | -0.298791664171 |
| H  | 2.074343927431  | 0.279865525562  | 0.193376038425  |
| H  | -0.692488784682 | -3.278506243983 | -0.616012562247 |
| H  | -3.115994738861 | -3.012487382093 | -0.206696831500 |
| H  | -4.052472629463 | -0.704627236795 | 0.086949070415  |
| H  | -2.557786392012 | 1.208783489041  | 0.274255203855  |
| Bi | 1.759913550101  | -1.458586577238 | -1.414847554472 |
| Br | 1.304916778840  | -3.908054262546 | -2.338632682077 |
| Br | 3.351609906064  | -2.113522100151 | 0.605106089167  |

## **RBiI<sub>2</sub> (R =2-PhC<sub>6</sub>H<sub>4</sub>)**

Coordinates of structure 1:

|    |                 |                 |                 |
|----|-----------------|-----------------|-----------------|
| C  | 0.113174200573  | 1.259270883965  | 0.069021359132  |
| C  | 0.259806942479  | 2.035352393350  | -1.099520765704 |
| C  | 1.175991589100  | 3.092299091408  | -1.149700377322 |
| C  | 1.944769547085  | 3.398473590069  | -0.027696491140 |
| C  | 1.782563175582  | 2.656976864023  | 1.147053686356  |
| C  | 0.877038883853  | 1.598911337536  | 1.195928961365  |
| C  | -0.777152786094 | 0.074926940328  | 0.067121015451  |
| C  | -0.596894801449 | -0.918125670688 | -0.917081469269 |
| C  | -1.426459647178 | -2.040731854770 | -0.932404570347 |
| C  | -2.424829779744 | -2.190383547146 | 0.034132359215  |
| C  | -2.590722581840 | -1.219879400336 | 1.024857455302  |
| C  | -1.767657661553 | -0.093803026750 | 1.045230900194  |
| H  | -0.411751539758 | 1.855410685870  | -1.943941688833 |
| H  | 1.271162385509  | 3.685739363741  | -2.059633708333 |
| H  | 2.662998391614  | 4.217821485876  | -0.063254478702 |
| H  | 2.382058579109  | 2.894286356939  | 2.026280581202  |
| H  | 0.782388364045  | 0.996457801979  | 2.099568413713  |
| H  | -1.281296894192 | -2.816125910672 | -1.687878620275 |
| H  | -3.068004002513 | -3.071485183425 | 0.018104674748  |
| H  | -3.366049097122 | -1.338177858233 | 1.783030675199  |
| H  | -1.902488967526 | 0.672991084766  | 1.810752759724  |
| Bi | 1.153430621565  | -0.599128146929 | -2.341339728121 |
| I  | 0.740988557692  | -3.018308389692 | -3.850375325255 |
| I  | 3.148213830763  | -1.330341981210 | -0.413551858300 |

Coordinates of structure 2:

|    |                 |                 |                 |
|----|-----------------|-----------------|-----------------|
| C  | 0.097502100638  | 1.286133147136  | 0.046593985197  |
| C  | -0.070449786138 | 2.289996101162  | -0.925082755080 |
| C  | 0.821137434505  | 3.362367069334  | -1.000911880997 |
| C  | 1.892240944025  | 3.446348098230  | -0.107813037871 |
| C  | 2.069558319833  | 2.455702439309  | 0.859867195864  |
| C  | 1.177082373607  | 1.383724647444  | 0.941490102518  |
| C  | -0.801925298685 | 0.094096843856  | 0.068007330406  |
| C  | -0.450057793100 | -1.008705360521 | -0.729850886685 |
| C  | -1.254798298502 | -2.148730798036 | -0.751457938859 |
| C  | -2.409314947749 | -2.196438924904 | 0.033537173258  |
| C  | -2.758587336739 | -1.105954961450 | 0.835044484619  |
| C  | -1.959122924248 | 0.039172246915  | 0.854126628950  |
| H  | -0.909575861341 | 2.220309617254  | -1.619537843957 |
| H  | 0.677506460422  | 4.134035405146  | -1.758242304711 |
| H  | 2.591209634809  | 4.281122645507  | -0.170131882025 |
| H  | 2.908610475570  | 2.511852133884  | 1.554040839197  |
| H  | 1.326628330212  | 0.598068078430  | 1.682633847767  |
| H  | -0.981264427967 | -2.998103903016 | -1.380675227974 |
| H  | -3.038352799428 | -3.087770650932 | 0.020793268248  |
| H  | -3.660372212493 | -1.145726901199 | 1.447042862629  |
| H  | -2.231245439065 | 0.893787002741  | 1.475847938079  |
| Bi | 1.485091642698  | -0.693754872008 | -1.860938489833 |
| I  | 1.024530439745  | -2.790191142321 | -3.764000517219 |
| I  | 3.135246279392  | -2.018911051961 | 0.084320868479  |

Coordinates of structure 3:

|    |                 |                 |                 |
|----|-----------------|-----------------|-----------------|
| C  | 0.100639256010  | 1.311973716838  | -0.004821294457 |
| C  | -0.338863173722 | 2.540937137858  | -0.523700565847 |
| C  | 0.520908457128  | 3.637968186448  | -0.574608541954 |
| C  | 1.836112894912  | 3.531205602763  | -0.109896106819 |
| C  | 2.283344156922  | 2.322285592836  | 0.423051210536  |
| C  | 1.420324078589  | 1.223002316747  | 0.484600577891  |
| C  | -0.770274294321 | 0.112521769834  | -0.004838698444 |
| C  | -0.293132758793 | -1.098701070812 | -0.545128395927 |
| C  | -1.101213182707 | -2.237195739058 | -0.527017417191 |
| C  | -2.386508147365 | -2.179186198265 | 0.015463275561  |
| C  | -2.875142323714 | -0.973682197237 | 0.527109003815  |
| C  | -2.075656251374 | 0.167943654593  | 0.509933647473  |
| H  | -1.354558208408 | 2.620711568980  | -0.912676376857 |
| H  | 0.166891704316  | 4.581616136138  | -0.990975938951 |
| H  | 2.504520859830  | 4.391101124641  | -0.158356773531 |
| H  | 3.297518648062  | 2.232477873296  | 0.812522364399  |
| H  | 1.746087936792  | 0.306060227341  | 0.985920085510  |
| H  | -0.737894756023 | -3.170092396062 | -0.961649196469 |
| H  | -3.010273918174 | -3.073926959714 | 0.030108877788  |
| H  | -3.880851703949 | -0.924593883673 | 0.945226363835  |
| H  | -2.447663965993 | 1.106402077397  | 0.924272016118  |
| Bi | 1.741310126486  | -1.022391005629 | -1.554660631642 |
| I  | 1.175314599638  | -3.126384085479 | -3.431332564243 |
| I  | 3.160337275860  | -2.477626539782 | 0.476158839406  |

Coordinates of structure 4:

|    |                 |                 |                 |
|----|-----------------|-----------------|-----------------|
| C  | 0.150607301078  | 1.300622146119  | 0.152107283905  |
| C  | -0.390989947718 | 2.601788091964  | 0.200263006173  |
| C  | 0.406074762724  | 3.735591502282  | 0.058872861812  |
| C  | 1.781809157401  | 3.622625657297  | -0.157504789101 |
| C  | 2.353819708726  | 2.352248609135  | -0.172657949393 |
| C  | 1.549346028003  | 1.222288848242  | -0.018224365809 |
| C  | -0.717712044626 | 0.095251210200  | 0.066002902012  |
| C  | -0.217219251493 | -1.188255570885 | -0.295852413055 |
| C  | -1.082713223981 | -2.287296415371 | -0.332309243166 |
| C  | -2.456236433194 | -2.139062691207 | -0.140914830648 |
| C  | -2.977827995461 | -0.856139360623 | 0.018341023833  |
| C  | -2.120811313901 | 0.237449320718  | 0.097594535963  |
| H  | -1.461750526301 | 2.746290046766  | 0.331180268604  |
| H  | -0.058783415435 | 4.721305727940  | 0.102774776751  |
| H  | 2.399011528513  | 4.512223778589  | -0.280975319331 |
| H  | 3.433452646738  | 2.229961748919  | -0.267186295162 |
| H  | 2.068945584242  | 0.286721669824  | 0.223505240390  |
| H  | -0.687632971316 | -3.275093552616 | -0.577328820449 |
| H  | -3.111653436765 | -3.009816873039 | -0.174964382699 |
| H  | -4.055553392834 | -0.699812178727 | 0.080710958262  |
| H  | -2.564489124831 | 1.218792741322  | 0.256273891254  |
| Bi | 1.756592339328  | -1.424418276322 | -1.424064509316 |
| I  | 1.223160734205  | -3.971668479952 | -2.655468683301 |
| I  | 3.461830596896  | -2.229170790573 | 0.744528612471  |

Optimized structure of four lowest energy conformations from GFN2-XTB simulations

**R<sub>2</sub>BiCH<sub>3</sub>**

Structure 1.

|    |                 |                 |                 |
|----|-----------------|-----------------|-----------------|
| C  | -0.324635579186 | -3.681371532716 | -0.676716312804 |
| C  | 0.850139127037  | -2.987823065177 | -0.390190763244 |
| C  | 1.191762712423  | -1.829771993253 | -1.104675350850 |
| C  | 0.333944904410  | -1.397617887321 | -2.130241617184 |
| C  | -0.841801710322 | -2.092483902605 | -2.419397924427 |
| C  | -1.174481541393 | -3.235767958462 | -1.691663501418 |
| H  | -2.094150500241 | -3.779134164896 | -1.914797760100 |
| H  | -1.496948023669 | -1.741339541241 | -3.218259375713 |
| H  | 0.610314274623  | -0.524453307154 | -2.725546180577 |
| C  | 2.416356243764  | -1.063554466520 | -0.764449885694 |
| C  | 3.663249164880  | -1.708601971853 | -0.761536795364 |
| C  | 4.826301796717  | -1.012240920915 | -0.431267274459 |
| C  | 4.751833813577  | 0.338368836407  | -0.088610528067 |
| C  | 3.509515447364  | 0.980647516896  | -0.068260613765 |
| C  | 2.334644526916  | 0.296375910007  | -0.397939855650 |
| Bi | 0.288845349927  | 1.317693800991  | -0.258401871753 |
| C  | -0.356278214208 | -0.173667829796 | 1.342648426407  |
| C  | 0.599008602998  | -0.715013845438 | 2.209255442468  |
| C  | 0.271744496283  | -1.748512097220 | 3.089262466021  |
| C  | -1.027441179977 | -2.261660694049 | 3.101683845002  |
| C  | -1.993668240840 | -1.718825155044 | 2.257842178170  |
| C  | -1.677218175305 | -0.660825365171 | 1.386949956971  |
| C  | -2.739631548308 | -0.073658092157 | 0.537981179530  |
| C  | -3.577584472877 | -0.881862225562 | -0.246581661181 |

|   |                 |                 |                 |
|---|-----------------|-----------------|-----------------|
| C | -4.564574408405 | -0.316204390458 | -1.053712016664 |
| C | -4.740180378921 | 1.069968261994  | -1.085177529554 |
| C | -3.925114950286 | 1.886041736507  | -0.298524530049 |
| C | -2.935277005460 | 1.318556807507  | 0.505597121017  |
| H | -2.331012138414 | 1.953576697641  | 1.158983518824  |
| H | -4.067363408190 | 2.968450130453  | -0.301439159076 |
| H | -5.513725114240 | 1.511795710260  | -1.715401608660 |
| H | -5.198094480034 | -0.960104514105 | -1.666666761412 |
| H | -3.423678426009 | -1.962442191844 | -0.241883321232 |
| H | -3.018175085948 | -2.096323027121 | 2.284810500634  |
| H | -1.290724743170 | -3.077505608622 | 3.777602476996  |
| H | 1.033074121896  | -2.160235472731 | 3.754859848978  |
| H | 1.629019058807  | -0.352764715598 | 2.174330154995  |
| C | 1.049428422251  | 2.844870178265  | 1.276423663921  |
| H | 0.185306303032  | 3.316671680034  | 1.761233406531  |
| H | 1.658701695588  | 2.323360287395  | 2.023437982593  |
| H | 1.645770529852  | 3.613461037248  | 0.768547088025  |
| H | 3.465120195392  | 2.029754065578  | 0.232260751423  |
| H | 5.656982277916  | 0.889914455343  | 0.172923647387  |
| H | 5.789987733026  | -1.524720840627 | -0.444521303403 |
| H | 3.715847271684  | -2.763849555625 | -1.038258057754 |
| H | 1.496566728582  | -3.318555050733 | 0.424374788171  |
| H | -0.583556473540 | -4.567620728511 | -0.095499884010 |

Structure 2.

|   |                |                |                 |
|---|----------------|----------------|-----------------|
| C | 1.835600719847 | 1.568428091894 | -2.354238883747 |
| C | 2.161814201390 | 0.456948471924 | -1.575633178366 |
| C | 2.225929394112 | 0.556220793674 | -0.176858765683 |
| C | 1.950067365865 | 1.798382973966 | 0.421352427243  |
| C | 1.633774950173 | 2.913086991198 | -0.357985652042 |

|    |                 |                 |                 |
|----|-----------------|-----------------|-----------------|
| C  | 1.575879925063  | 2.800878790575  | -1.748768342807 |
| H  | 1.320590564359  | 3.668540052235  | -2.358983862145 |
| H  | 1.433460603576  | 3.871723572560  | 0.123857910832  |
| H  | 2.018067993735  | 1.890238539907  | 1.507490267604  |
| C  | 2.590931258122  | -0.615920247425 | 0.661105200352  |
| C  | 3.850047849898  | -1.213766281975 | 0.497229650860  |
| C  | 4.229126344595  | -2.301039780550 | 1.285002888945  |
| C  | 3.347372238740  | -2.802208171073 | 2.243114001445  |
| C  | 2.082723337332  | -2.223913152073 | 2.393328356566  |
| C  | 1.683711558407  | -1.140982230420 | 1.603236733727  |
| Bi | -0.438212137285 | -0.300599908319 | 1.660090820837  |
| C  | -0.912351642422 | -1.370849302761 | -0.302451907003 |
| C  | -0.285008946509 | -2.587969385972 | -0.588425713830 |
| C  | -0.618367146508 | -3.325565001021 | -1.726255361560 |
| C  | -1.602680657367 | -2.849353634043 | -2.594713157420 |
| C  | -2.233945007487 | -1.636933689548 | -2.325274024785 |
| C  | -1.888159972101 | -0.880061900046 | -1.192068473607 |
| C  | -2.550428049269 | 0.427815003938  | -0.967469671088 |
| C  | -1.777120377105 | 1.586354519005  | -0.782797488952 |
| C  | -2.384066278695 | 2.823833259189  | -0.567227363380 |
| C  | -3.776466580944 | 2.925057093326  | -0.531149126432 |
| C  | -4.556715822902 | 1.781857503705  | -0.723874698450 |
| C  | -3.949169526454 | 0.544639208843  | -0.943925091647 |
| H  | -4.560037673167 | -0.349972813613 | -1.080989706066 |
| H  | -5.645898183080 | 1.853327667679  | -0.697505216698 |
| H  | -4.253528711326 | 3.891183814953  | -0.358589821041 |
| H  | -1.763363411324 | 3.712185057763  | -0.435519946377 |
| H  | -0.690060783076 | 1.517376141112  | -0.849734285759 |
| H  | -2.989115660994 | -1.248330492567 | -3.012514699927 |
| H  | -1.873256572943 | -3.417812250737 | -3.486312693259 |



|   |                 |                 |                 |
|---|-----------------|-----------------|-----------------|
| H | -0.113786960469 | -4.271705449052 | -1.930253604393 |
| H | 0.477045994961  | -2.977146473701 | 0.092007630538  |
| C | -1.223939204889 | -2.076764923266 | 2.883420637715  |
| H | -0.865492077759 | -2.006126381333 | 3.918090492562  |
| H | -2.320882237427 | -2.037999878006 | 2.871787474570  |
| H | -0.880761281184 | -3.009664636579 | 2.420642373650  |
| H | 1.393452941928  | -2.651142856289 | 3.125353735674  |
| H | 3.636712868026  | -3.650019074783 | 2.867380449977  |
| H | 5.214086568528  | -2.751839997572 | 1.153436099472  |
| H | 4.539871414360  | -0.806492777712 | -0.245518999595 |
| H | 2.349369646597  | -0.508887010731 | -2.047780614106 |
| H | 1.775546163068  | 1.469890153719  | -3.439617802401 |

Structure 3.

|    |                 |                 |                 |
|----|-----------------|-----------------|-----------------|
| C  | 0.313735768869  | 2.852982388592  | 1.653228181317  |
| C  | -0.578434809735 | 1.805257924510  | 1.419359228777  |
| C  | -1.799148392904 | 2.031516368434  | 0.759663518667  |
| C  | -2.111862089292 | 3.342546629370  | 0.365077832944  |
| C  | -1.222026455959 | 4.390320621197  | 0.602863142922  |
| C  | -0.003186497101 | 4.148696772559  | 1.242787584914  |
| H  | 0.694276505070  | 4.968461763059  | 1.422102774079  |
| H  | -1.476405819514 | 5.400359997906  | 0.277132617261  |
| H  | -3.053321938846 | 3.530590844191  | -0.154466492587 |
| C  | -2.726489012424 | 0.907502733126  | 0.475306685732  |
| C  | -4.072489422073 | 1.008389345802  | 0.865531734870  |
| C  | -4.969295569118 | -0.030393037604 | 0.618238930084  |
| C  | -4.530559433560 | -1.182447877075 | -0.036079175111 |
| C  | -3.196195760803 | -1.282846118649 | -0.441679156782 |
| C  | -2.280041356746 | -0.253289039285 | -0.195353081032 |
| Bi | -0.145239573072 | -0.320682179578 | -1.017810248659 |

|   |                 |                 |                 |
|---|-----------------|-----------------|-----------------|
| C | 0.689093889922  | -1.367011695719 | 0.836976316138  |
| C | -0.157867782256 | -2.113354524910 | 1.663568842953  |
| C | 0.303999381144  | -2.664924657908 | 2.861162619375  |
| C | 1.628936672534  | -2.461003670797 | 3.253185482391  |
| C | 2.484186836125  | -1.718960033733 | 2.440448381351  |
| C | 2.031332358572  | -1.178384191782 | 1.223918790123  |
| C | 2.966672323608  | -0.405637926484 | 0.372245230581  |
| C | 3.699544586360  | 0.672966647900  | 0.891780604258  |
| C | 4.552577035512  | 1.415985637989  | 0.075348449627  |
| C | 4.697484900132  | 1.087561374632  | -1.275007726870 |
| C | 3.988001589852  | 0.006693635352  | -1.801952938542 |
| C | 3.130082499288  | -0.731794931746 | -0.985484561982 |
| H | 2.605557705720  | -1.601971487593 | -1.387975533248 |
| H | 4.107424809714  | -0.267710859768 | -2.851332641228 |
| H | 5.364751388370  | 1.669711666842  | -1.912497612318 |
| H | 5.102542514376  | 2.260751773682  | 0.493695462748  |
| H | 3.576364174164  | 0.939707117548  | 1.943506916261  |
| H | 3.525862688550  | -1.570321882964 | 2.732585227839  |
| H | 1.997276394782  | -2.882320807472 | 4.189812995585  |
| H | -0.373144171270 | -3.245246093134 | 3.491325203185  |
| H | -1.205703283771 | -2.248824224354 | 1.384260850850  |
| C | -0.474302366747 | -2.320209734366 | -2.097158362102 |
| H | -0.779112366351 | -3.082377969476 | -1.370796557790 |
| H | -1.240008246997 | -2.197833458219 | -2.873559836673 |
| H | 0.473133962002  | -2.620507888197 | -2.563387856786 |
| H | -2.874322700265 | -2.183238117110 | -0.969448148931 |
| H | -5.225416344816 | -2.000676725346 | -0.236352937895 |
| H | -6.008163660841 | 0.058663917999  | 0.940443544163  |
| H | -4.406954399890 | 1.905070867594  | 1.392139501922  |
| H | -0.343702678341 | 0.802249972119  | 1.780956204563  |

|   |                |                |                |
|---|----------------|----------------|----------------|
| H | 1.257665148028 | 2.652302132867 | 2.162361013055 |
|---|----------------|----------------|----------------|

Structure 4.

|    |                 |                 |                 |
|----|-----------------|-----------------|-----------------|
| C  | -1.668477227097 | -1.706109641983 | -1.927777664675 |
| C  | -1.770405517810 | -0.514794488306 | -1.206019743082 |
| C  | -2.752006484046 | -0.357334288379 | -0.212367094041 |
| C  | -3.637355641945 | -1.420989681503 | 0.026447766187  |
| C  | -3.531725427020 | -2.613282486750 | -0.690423994292 |
| C  | -2.543902397569 | -2.762265558461 | -1.667633749233 |
| H  | -2.462513462936 | -3.694836034329 | -2.228210098420 |
| H  | -4.220230596617 | -3.433907466099 | -0.480076658904 |
| H  | -4.400601589981 | -1.313175772519 | 0.800068524240  |
| C  | -2.843327705928 | 0.903436933059  | 0.565726964941  |
| C  | -4.070597999931 | 1.584498064838  | 0.633289210912  |
| C  | -4.186745441831 | 2.780551412612  | 1.340582733951  |
| C  | -3.073975832051 | 3.306771077390  | 1.997923328237  |
| C  | -1.855260884915 | 2.622389843501  | 1.953398856273  |
| C  | -1.719166331823 | 1.422558589455  | 1.244819790584  |
| Bi | 0.192009694162  | 0.172191322824  | 1.368999438237  |
| C  | 1.202557749327  | 1.196788646118  | -0.410557271175 |
| C  | 0.732581457283  | 2.431594521104  | -0.872366176466 |
| C  | 1.393203634255  | 3.117642750999  | -1.895293184265 |
| C  | 2.543392379574  | 2.570040325066  | -2.466742891644 |
| C  | 3.018828139482  | 1.338480119155  | -2.018814446009 |
| C  | 2.351308202922  | 0.633092787071  | -1.001789011806 |
| C  | 2.876640859078  | -0.686131577794 | -0.567479574682 |
| C  | 2.051468288240  | -1.824490607967 | -0.573253014999 |
| C  | 2.542770919931  | -3.065883665436 | -0.166791646510 |
| C  | 3.868024667448  | -3.192017424312 | 0.254938633891  |
| C  | 4.700870524524  | -2.070324731991 | 0.258442739532  |

|   |                 |                 |                 |
|---|-----------------|-----------------|-----------------|
| C | 4.210640063088  | -0.830340501509 | -0.153637865249 |
| H | 4.858787386372  | 0.048135828641  | -0.138188687008 |
| H | 5.736905490952  | -2.159894123768 | 0.589187978695  |
| H | 4.251595082805  | -4.161278303617 | 0.576884283888  |
| H | 1.887329520393  | -3.938412243771 | -0.185095591173 |
| H | 1.023062955950  | -1.738776947509 | -0.929927614177 |
| H | 3.907002295918  | 0.896477189473  | -2.475377295036 |
| H | 3.066575634561  | 3.097507538861  | -3.266154471369 |
| H | 1.010875830377  | 4.079344097784  | -2.241906253988 |
| H | -0.157700733696 | 2.875102021986  | -0.419841837152 |
| C | 1.228133181351  | 1.623513363170  | 2.813238453817  |
| H | 2.251757437928  | 1.261261383202  | 2.972240360392  |
| H | 1.258087997766  | 2.622969513167  | 2.364789479692  |
| H | 0.690162590124  | 1.643588625760  | 3.769352276152  |
| H | -1.000269938624 | 3.035436622833  | 2.492856184230  |
| H | -3.153114900208 | 4.245147389706  | 2.549946636437  |
| H | -5.144186732299 | 3.303635832005  | 1.371962178174  |
| H | -4.933576282488 | 1.178193913662  | 0.101170976601  |
| H | -1.101933321328 | 0.318162089783  | -1.433744382608 |
| H | -0.906615533667 | -1.802513257224 | -2.704244577100 |

## **R<sub>2</sub>BiCl**

Structure 1.

|   |                 |                 |                |
|---|-----------------|-----------------|----------------|
| C | -2.342817423852 | -0.968899038111 | 2.861077416925 |
| C | -1.074396394544 | -1.508336342962 | 2.654499827167 |
| C | -0.715650437771 | -2.036296215460 | 1.404988423652 |
| C | -1.681085579602 | -2.042005312909 | 0.378752647238 |
| C | -2.951989170252 | -1.495228125576 | 0.584903782421 |
| C | -3.282344120221 | -0.952241277964 | 1.826026784907 |
| H | -4.270788895667 | -0.520993874380 | 1.988739322468 |

|    |                 |                 |                 |
|----|-----------------|-----------------|-----------------|
| H  | -3.685024770800 | -1.504735403977 | -0.223332636751 |
| H  | -1.450813733052 | -2.540410059875 | -0.567604083340 |
| C  | 0.669031923423  | -2.490473858494 | 1.132965701212  |
| C  | 1.304741813585  | -3.437866885932 | 1.948920405681  |
| C  | 2.618128984540  | -3.826270103589 | 1.681596601533  |
| C  | 3.311140024970  | -3.258336863189 | 0.609983454645  |
| C  | 2.691283923514  | -2.293768855028 | -0.191399806394 |
| C  | 1.375600531034  | -1.901881338666 | 0.064387480006  |
| Bi | 0.302065282866  | -0.265800405875 | -1.122895017719 |
| Cl | 2.437882393834  | 0.671265025682  | -2.068676091218 |
| C  | 0.239228434950  | 1.075200157259  | 0.717520859051  |
| C  | 1.180531705055  | 0.922997177252  | 1.739216408833  |
| C  | 1.056548787981  | 1.628714051557  | 2.937296500237  |
| C  | -0.029718786841 | 2.487013109848  | 3.126318733887  |
| C  | -0.963885568633 | 2.660870292011  | 2.107135917955  |
| C  | -0.829238281450 | 1.977626829062  | 0.885419172013  |
| C  | -1.798152981689 | 2.223583457831  | -0.208279711472 |
| C  | -3.183361299319 | 2.174607439063  | 0.015658231805  |
| C  | -4.083209287732 | 2.382182502520  | -1.029441400316 |
| C  | -3.615934531631 | 2.650225245844  | -2.319439078403 |
| C  | -2.241539843210 | 2.722124014969  | -2.553372433487 |
| C  | -1.340802369521 | 2.514357818209  | -1.507106532586 |
| H  | -0.266353035359 | 2.621464945614  | -1.682913862890 |
| H  | -1.865464103731 | 2.954215132189  | -3.550897978035 |
| H  | -4.321051493724 | 2.811319862881  | -3.136252957869 |
| H  | -5.156855561949 | 2.328697082327  | -0.837943412488 |
| H  | -3.550317184625 | 1.942674541073  | 1.016471168336  |
| H  | -1.795085188754 | 3.357408612454  | 2.238347663500  |
| H  | -0.140085475560 | 3.035534390997  | 4.063476705412  |
| H  | 1.802458526114  | 1.502904139920  | 3.725007572843  |

|   |                 |                 |                 |
|---|-----------------|-----------------|-----------------|
| H | 2.012627967931  | 0.227144601370  | 1.610667280819  |
| H | 3.248975128112  | -1.818734214908 | -1.002157331064 |
| H | 4.339491237157  | -3.559589424974 | 0.402487300354  |
| H | 3.101773904016  | -4.574655333428 | 2.311908132882  |
| H | 0.757635886412  | -3.880993303796 | 2.784076147562  |
| H | -0.329048334728 | -1.478138409153 | 3.450569898555  |
| H | -2.593868601281 | -0.538397781685 | 3.831637792136  |

Structure 2.

|    |                 |                 |                 |
|----|-----------------|-----------------|-----------------|
| C  | 4.910312347249  | 0.985169291639  | 0.167009736088  |
| C  | 4.049821497431  | 0.277304090551  | -0.672433092188 |
| C  | 3.091514649606  | -0.600765037895 | -0.140982530173 |
| C  | 3.031196179405  | -0.764981449961 | 1.255076606851  |
| C  | 3.894925640050  | -0.058123380615 | 2.093897066658  |
| C  | 4.833471153113  | 0.822926358595  | 1.553183575432  |
| H  | 5.506986366388  | 1.378174189324  | 2.207815411941  |
| H  | 3.836510813877  | -0.205347137235 | 3.173879769585  |
| H  | 2.323166789037  | -1.481382512416 | 1.680567696279  |
| C  | 2.148962243536  | -1.333448979481 | -1.020370260186 |
| C  | 2.642027363632  | -2.084965278155 | -2.100558903887 |
| C  | 1.775214181742  | -2.802207850520 | -2.923378475607 |
| C  | 0.400298249048  | -2.773442092827 | -2.679860070518 |
| C  | -0.100663454797 | -2.009624592861 | -1.622815689630 |
| C  | 0.758009827009  | -1.281337874492 | -0.792726310402 |
| Bi | -0.056156309110 | 0.140430267086  | 0.794176743048  |
| Cl | -0.465983903735 | -1.664084444928 | 2.504318220698  |
| C  | -2.186138177334 | 0.059848324501  | -0.025082443908 |
| C  | -3.101761853663 | -0.937489581912 | 0.321379745076  |
| C  | -4.424034307869 | -0.874845041987 | -0.128666162018 |
| C  | -4.843271753691 | 0.201600484016  | -0.914959970815 |

|   |                 |                 |                 |
|---|-----------------|-----------------|-----------------|
| C | -3.942392346362 | 1.211272486106  | -1.252918507230 |
| C | -2.607589558138 | 1.143601057170  | -0.822831349894 |
| C | -1.639744830576 | 2.213286696352  | -1.166058296374 |
| C | -0.375174145649 | 1.881950629472  | -1.692432864151 |
| C | 0.586901666372  | 2.869173236951  | -1.927593541334 |
| C | 0.293983742102  | 4.206525563712  | -1.661398212497 |
| C | -0.968969365819 | 4.551144959518  | -1.168761377948 |
| C | -1.925911667823 | 3.566640597538  | -0.923318675961 |
| H | -2.898376389402 | 3.838251829634  | -0.508797164859 |
| H | -1.204471543763 | 5.596112879300  | -0.959261528992 |
| H | 1.041926536737  | 4.979826561570  | -1.841801017863 |
| H | 1.559469077690  | 2.587226235478  | -2.333720361257 |
| H | -0.170313080913 | 0.846012054209  | -1.976527641654 |
| H | -4.264420577432 | 2.049721238576  | -1.874895930950 |
| H | -5.874745184065 | 0.254542837426  | -1.267154760012 |
| H | -5.129960367413 | -1.662113315556 | 0.143181665871  |
| H | -2.781469814977 | -1.763147688028 | 0.961669649274  |
| H | -1.179762631366 | -1.970009187447 | -1.455649759182 |
| H | -0.282747966112 | -3.339729597041 | -3.315880970130 |
| H | 2.174957991518  | -3.390862852189 | -3.751088267937 |
| H | 3.720073343550  | -2.124385062385 | -2.273071996508 |
| H | 4.100808710515  | 0.417957967260  | -1.754538067916 |
| H | 5.641490860399  | 1.672478121947  | -0.262729684822 |

Structure 3.

|   |                 |                 |                 |
|---|-----------------|-----------------|-----------------|
| C | -1.871362684646 | -2.884498224893 | -0.272933883602 |
| C | -1.504384646509 | -1.561297678772 | -0.525095626813 |
| C | -2.477523086393 | -0.554517769138 | -0.652853332590 |
| C | -3.830567976529 | -0.913800695397 | -0.543520519205 |
| C | -4.196904822702 | -2.235555441306 | -0.289208682001 |

|    |                 |                 |                 |
|----|-----------------|-----------------|-----------------|
| C  | -3.219243533902 | -3.224695028800 | -0.148589224379 |
| H  | -3.509759133122 | -4.256762800215 | 0.053085931658  |
| H  | -5.252527374964 | -2.494680012504 | -0.190182064472 |
| H  | -4.595372309046 | -0.139606291638 | -0.631508666053 |
| C  | -2.065002501857 | 0.849281563798  | -0.882200275614 |
| C  | -2.619921871010 | 1.579701487563  | -1.947022374208 |
| C  | -2.213597937520 | 2.888768930743  | -2.197565765264 |
| C  | -1.251753436112 | 3.488593847323  | -1.380670571358 |
| C  | -0.710066228339 | 2.776699339125  | -0.308800645818 |
| C  | -1.114530056641 | 1.464531805753  | -0.044025993121 |
| Bi | -0.376761513987 | 0.390745681442  | 1.826514857218  |
| Cl | -1.334287664208 | 2.099433130860  | 3.401533170464  |
| C  | 1.622818139787  | 1.479342513530  | 1.661765797809  |
| C  | 1.902500080490  | 2.661593603362  | 2.349776492445  |
| C  | 3.083840536852  | 3.366981033780  | 2.098203215606  |
| C  | 3.991216230830  | 2.892065277694  | 1.149310054686  |
| C  | 3.728150270679  | 1.703188693084  | 0.468251361941  |
| C  | 2.556350704235  | 0.979385896179  | 0.734790538561  |
| C  | 2.298012818652  | -0.306879816274 | 0.041909250995  |
| C  | 2.288407597207  | -0.401251753760 | -1.359863993279 |
| C  | 2.059942752602  | -1.625249496019 | -1.988707879130 |
| C  | 1.838811466671  | -2.779655198306 | -1.230419932674 |
| C  | 1.841973331238  | -2.702126335705 | 0.162644474328  |
| C  | 2.066943473664  | -1.475555552391 | 0.793519598824  |
| H  | 2.126045559048  | -1.422835109062 | 1.883384626569  |
| H  | 1.682217546839  | -3.598887512064 | 0.763653676133  |
| H  | 1.660861806499  | -3.734588569718 | -1.727165592665 |
| H  | 2.045876039471  | -1.679150364538 | -3.078763709561 |
| H  | 2.445827363514  | 0.501489549305  | -1.952275764360 |
| H  | 4.444666456346  | 1.315526753967  | -0.259683857046 |



|   |                 |                 |                 |
|---|-----------------|-----------------|-----------------|
| H | 4.910039110954  | 3.443909502591  | 0.943997917633  |
| H | 3.289623314484  | 4.292622615657  | 2.638711290241  |
| H | 1.174540046906  | 3.054228432864  | 3.064950347371  |
| H | 0.023201163586  | 3.260488032396  | 0.340134169382  |
| H | -0.926279619785 | 4.512045051795  | -1.574819693624 |
| H | -2.642167069481 | 3.439018428046  | -3.036990413386 |
| H | -3.354812411271 | 1.098469868316  | -2.596157808186 |
| H | -0.453322120252 | -1.308741805320 | -0.684407852095 |
| H | -1.098632812278 | -3.650461583351 | -0.186786651361 |

Structure 4.

|    |                 |                 |                 |
|----|-----------------|-----------------|-----------------|
| C  | 0.768801054899  | -2.941824616345 | 1.665755610939  |
| C  | 1.313136496450  | -1.684347202266 | 1.386696058302  |
| C  | 2.483509825316  | -1.559466554181 | 0.611844248909  |
| C  | 3.104316998866  | -2.731584119168 | 0.148687322654  |
| C  | 2.561841188385  | -3.984684794187 | 0.431823486542  |
| C  | 1.388926873353  | -4.095227613061 | 1.185490344473  |
| H  | 0.967771750989  | -5.077432838631 | 1.403549349971  |
| H  | 3.052580593746  | -4.883357371387 | 0.055008042637  |
| H  | 4.007613521509  | -2.648839065320 | -0.458393593456 |
| C  | 3.013392521477  | -0.216526256375 | 0.272732570269  |
| C  | 4.369205947410  | 0.090559210912  | 0.471977249943  |
| C  | 4.858042275569  | 1.358240209375  | 0.157468824849  |
| C  | 4.000714018966  | 2.325460960699  | -0.372975872630 |
| C  | 2.654689731527  | 2.019302997737  | -0.596034523996 |
| C  | 2.150931035458  | 0.756327454959  | -0.272622428181 |
| Bi | 0.027881566068  | 0.101907454255  | -0.801530030967 |
| Cl | -0.448039694919 | 2.132453709769  | -2.201244570893 |
| C  | -0.908383893152 | 1.045660328122  | 1.053009116674  |
| C  | -0.175304215803 | 1.913367309495  | 1.869106036825  |

|   |                 |                 |                 |
|---|-----------------|-----------------|-----------------|
| C | -0.781215930471 | 2.566985144208  | 2.945119001620  |
| C | -2.136095185638 | 2.356881735668  | 3.209599049365  |
| C | -2.875550092232 | 1.489978679379  | 2.405940259579  |
| C | -2.270333899072 | 0.813913057267  | 1.333062205296  |
| C | -3.073342578699 | -0.114907554192 | 0.500476811709  |
| C | -4.259052176044 | 0.313280705918  | -0.116930966984 |
| C | -4.995972305563 | -0.554420834527 | -0.922870245897 |
| C | -4.564810975225 | -1.868443178883 | -1.122991787016 |
| C | -3.394945671191 | -2.312707430430 | -0.504631882966 |
| C | -2.657024918570 | -1.443308849404 | 0.300745773440  |
| H | -1.763363210467 | -1.805796023412 | 0.814358468240  |
| H | -3.057504899494 | -3.341276107923 | -0.642280817111 |
| H | -5.141439121279 | -2.544306162859 | -1.756355365168 |
| H | -5.907914975525 | -0.199893472818 | -1.405462244413 |
| H | -4.583821185213 | 1.346014739020  | 0.019219211415  |
| H | -3.931514882168 | 1.310328100409  | 2.619380059848  |
| H | -2.617471054790 | 2.864160874249  | 4.047388769785  |
| H | -0.196564537860 | 3.243180165801  | 3.571941569528  |
| H | 0.878301500517  | 2.103449886977  | 1.651235150145  |
| H | 1.991882645890  | 2.765392366312  | -1.041464523522 |
| H | 4.382306153521  | 3.316843847750  | -0.623986482934 |
| H | 5.910048516511  | 1.592127112322  | 0.329296749332  |
| H | 5.033599273420  | -0.664357845897 | 0.898584651328  |
| H | 0.863754452160  | -0.789844126997 | 1.825881526008  |
| H | -0.129562538633 | -3.017039032336 | 2.281327816509  |

## **R<sub>2</sub>BiBr**

Structure 1.

|   |                |                 |                 |
|---|----------------|-----------------|-----------------|
| C | 3.180375791267 | -1.577826114151 | -0.213692552058 |
| C | 1.880056819753 | -2.094196534907 | -0.185327854985 |

|    |                 |                 |                 |
|----|-----------------|-----------------|-----------------|
| C  | 1.073457058852  | -2.087289965646 | -1.341371143082 |
| C  | 1.621808783360  | -1.590587525518 | -2.533725491390 |
| C  | 2.919230712122  | -1.082102451521 | -2.562413431691 |
| C  | 3.699205771108  | -1.065013680772 | -1.401940391117 |
| H  | 4.710732550750  | -0.658309184420 | -1.426818749327 |
| H  | 3.317866952910  | -0.675767939342 | -3.493190109896 |
| H  | 0.999842465833  | -1.558462069809 | -3.429511346634 |
| C  | -0.345844808792 | -2.509789195116 | -1.268171210285 |
| C  | -0.867958337107 | -3.468863131110 | -2.148120037062 |
| C  | -2.212794416182 | -3.833221761102 | -2.071549137372 |
| C  | -3.047638826341 | -3.229375472171 | -1.128740565647 |
| C  | -2.537715384589 | -2.253364642020 | -0.266307435484 |
| C  | -1.192747778414 | -1.883548856849 | -0.331041135151 |
| Bi | -0.253697241541 | -0.240033237755 | 0.957636852104  |
| Br | -2.599997678257 | 0.839184840292  | 1.670483111974  |
| C  | 0.065677701882  | 1.066919230639  | -0.878820780316 |
| C  | -0.723287377330 | 0.902041002051  | -2.020707123561 |
| C  | -0.427001032818 | 1.589931868396  | -3.198915264449 |
| C  | 0.676447294410  | 2.445828299789  | -3.243180301640 |
| C  | 1.457595949325  | 2.632282946318  | -2.104508276851 |
| C  | 1.149960234138  | 1.965030804668  | -0.905632948185 |
| C  | 1.964224089284  | 2.216175397680  | 0.306903924638  |
| C  | 3.366333724865  | 2.146367081072  | 0.271376452111  |
| C  | 4.120811567942  | 2.355576520607  | 1.425622203646  |
| C  | 3.488131089686  | 2.646150676533  | 2.637877770752  |
| C  | 2.095851010887  | 2.737525161305  | 2.684673967069  |
| C  | 1.340456904787  | 2.528576582570  | 1.528955663692  |
| H  | 0.253487379932  | 2.649801487003  | 1.558958490278  |
| H  | 1.592593511973  | 2.985160116696  | 3.620669818911  |
| H  | 4.079505101380  | 2.808096623075  | 3.540326857152  |

|   |                 |                 |                 |
|---|-----------------|-----------------|-----------------|
| H | 5.209541857269  | 2.285138158879  | 1.381558435091  |
| H | 3.859664279094  | 1.894042463196  | -0.668577872530 |
| H | 2.301332582442  | 3.325758665146  | -2.125194656863 |
| H | 0.919618573242  | 2.981657460334  | -4.162301751325 |
| H | -1.053239113234 | 1.453311308186  | -4.082877859561 |
| H | -1.566977808740 | 0.208640891900  | -2.001930842685 |
| H | -3.203520727549 | -1.753480287877 | 0.441959063572  |
| H | -4.100488336201 | -3.511843856274 | -1.069403956001 |
| H | -2.609449323580 | -4.591459760017 | -2.749203918620 |
| H | -0.209085659715 | -3.940442299412 | -2.880963742688 |
| H | 1.501446879713  | -2.568390717607 | 0.724448473887  |
| H | 3.787401212187  | -1.587468902936 | 0.692817801581  |

Structure 2.

|    |                 |                 |                 |
|----|-----------------|-----------------|-----------------|
| C  | 0.581329875162  | 4.521026982603  | 1.388095140419  |
| C  | 1.629272396635  | 3.651977781698  | 1.083820246115  |
| C  | 1.455716197527  | 2.620428159143  | 0.146603038009  |
| C  | 0.208204812733  | 2.510482109724  | -0.501322953925 |
| C  | -0.845930227723 | 3.373984986268  | -0.184010978749 |
| C  | -0.663720297063 | 4.377892132099  | 0.766630067980  |
| H  | -1.483706902768 | 5.051245452277  | 1.020272728584  |
| H  | -1.805031220707 | 3.261476978807  | -0.692418680678 |
| H  | 0.083533107250  | 1.778979409979  | -1.304846063577 |
| C  | 2.522863032078  | 1.623542185537  | -0.111624914308 |
| C  | 3.834089573608  | 2.031499740631  | -0.404530366425 |
| C  | 4.832340698366  | 1.084914720321  | -0.631674093096 |
| C  | 4.534807890031  | -0.277232584490 | -0.547427624584 |
| C  | 3.236104766294  | -0.689904910489 | -0.234097516624 |
| C  | 2.222785338068  | 0.248398053619  | -0.021712987007 |
| Bi | 0.103425571107  | -0.292615706428 | 0.643794992069  |

|    |                 |                 |                 |
|----|-----------------|-----------------|-----------------|
| Br | 0.668838030423  | -2.864036036961 | 1.151013900166  |
| C  | -0.594383768316 | -0.708751463241 | -1.489284830583 |
| C  | 0.327906243517  | -0.945412843037 | -2.513663117316 |
| C  | -0.093392241760 | -1.083588788063 | -3.838445454962 |
| C  | -1.450283808333 | -0.971332399756 | -4.149866957575 |
| C  | -2.378625734058 | -0.735311819839 | -3.137531537124 |
| C  | -1.966611169594 | -0.615934251035 | -1.799114637604 |
| C  | -2.971463845368 | -0.377759379020 | -0.734668554999 |
| C  | -3.892738648345 | 0.677570644748  | -0.831921467515 |
| C  | -4.809734309247 | 0.920429189376  | 0.191352191769  |
| C  | -4.827152914340 | 0.107361507010  | 1.327969854616  |
| C  | -3.929328454851 | -0.957130590422 | 1.429188396162  |
| C  | -3.009678248366 | -1.199659424690 | 0.406704477201  |
| H  | -2.335451500808 | -2.058406073833 | 0.472682515615  |
| H  | -3.946801655375 | -1.609075598667 | 2.304317551346  |
| H  | -5.543243723363 | 0.299613637739  | 2.128676789977  |
| H  | -5.510391953987 | 1.752984275302  | 0.104374272996  |
| H  | -3.870685415564 | 1.322419539074  | -1.713275140092 |
| H  | -3.442668771380 | -0.667840202671 | -3.375409745592 |
| H  | -1.787752612560 | -1.075132186915 | -5.182490072634 |
| H  | 0.638094263444  | -1.273372041690 | -4.626121491490 |
| H  | 1.393232233668  | -1.009812484699 | -2.281468019102 |
| H  | 3.013998478411  | -1.756174187543 | -0.138069745434 |
| H  | 5.316186404517  | -1.020349084011 | -0.717934836073 |
| H  | 5.844644181675  | 1.411670753036  | -0.875127222332 |
| H  | 4.060439912810  | 3.097707027007  | -0.478466290397 |
| H  | 2.587062416657  | 3.745974858175  | 1.598525588253  |
| H  | 0.731690999895  | 5.307425933327  | 2.130107548521  |

Structure 3.

|    |                 |                 |                 |
|----|-----------------|-----------------|-----------------|
| C  | 1.492774856358  | 3.021989237528  | -1.069672721643 |
| C  | 1.797260071344  | 1.657618664192  | -1.023569952957 |
| C  | 2.858515764998  | 1.180390496734  | -0.228556102777 |
| C  | 3.622425487489  | 2.113250484711  | 0.491853290784  |
| C  | 3.320225392751  | 3.473879855524  | 0.440162119958  |
| C  | 2.249537109111  | 3.933375965442  | -0.333375927088 |
| H  | 2.014800724249  | 4.998343237053  | -0.368052654680 |
| H  | 3.918279161645  | 4.181518031562  | 1.016787642428  |
| H  | 4.443352639592  | 1.757170863795  | 1.117295862727  |
| C  | 3.118533861195  | -0.276155517760 | -0.131020604768 |
| C  | 4.412879766025  | -0.787175049565 | -0.319007927283 |
| C  | 4.647686845156  | -2.158914552072 | -0.233854562255 |
| C  | 3.595127777347  | -3.030193251873 | 0.056480497904  |
| C  | 2.308657832833  | -2.525561796538 | 0.268358257044  |
| C  | 2.057440973520  | -1.153773188448 | 0.172154998590  |
| Bi | 0.038671952974  | -0.213109573314 | 0.683585354303  |
| Br | -0.985798040798 | -2.427239244441 | 1.783576959743  |
| C  | -0.864655967039 | -0.685803742554 | -1.355114763494 |
| C  | -0.200650011255 | -1.507634215567 | -2.271507516406 |
| C  | -0.808925755918 | -1.875370157598 | -3.473950109394 |
| C  | -2.097255523651 | -1.423434269648 | -3.766386748564 |
| C  | -2.766107812096 | -0.597639126582 | -2.863863391602 |
| C  | -2.154398325912 | -0.207210004927 | -1.661473724731 |
| C  | -2.877167159011 | 0.685644705098  | -0.722849048065 |
| C  | -4.148345032100 | 0.344869828575  | -0.235298313425 |
| C  | -4.807305202537 | 1.173065624277  | 0.673290531345  |
| C  | -4.210464471909 | 2.359883329641  | 1.106688468865  |
| C  | -2.952077419368 | 2.718363090338  | 0.620450854989  |
| C  | -2.291869469506 | 1.887860879422  | -0.286885176646 |

|   |                 |                 |                 |
|---|-----------------|-----------------|-----------------|
| H | -1.324039654727 | 2.188454448305  | -0.695195756104 |
| H | -2.483977720638 | 3.649770007220  | 0.942634797961  |
| H | -4.726651290450 | 3.004771675475  | 1.819553918649  |
| H | -5.787925777738 | 0.885186657794  | 1.054401985207  |
| H | -4.602651806179 | -0.594554739903 | -0.553861889842 |
| H | -3.766902940264 | -0.227404617435 | -3.094869517455 |
| H | -2.580236474385 | -1.709822946062 | -4.702027598605 |
| H | -0.279109578825 | -2.519504642225 | -4.178467463617 |
| H | 0.795704548825  | -1.888572965301 | -2.037289140524 |
| H | 1.493833783378  | -3.206743777680 | 0.526938827776  |
| H | 3.777353673172  | -4.104406785104 | 0.128488544225  |
| H | 5.653905624023  | -2.548722740601 | -0.396602472538 |
| H | 5.229882038742  | -0.103237608258 | -0.558917575978 |
| H | 1.248469286620  | 0.957483493426  | -1.660046659200 |
| H | 0.675104262958  | 3.372179937344  | -1.703006592854 |

Structure 4.

|   |                 |                 |                 |
|---|-----------------|-----------------|-----------------|
| C | 2.058062220893  | -3.456281345355 | -1.079048517203 |
| C | 0.836733435263  | -2.834619094735 | -1.334418579240 |
| C | 0.787414204995  | -1.488800011294 | -1.732313624205 |
| C | 1.991829251231  | -0.787823973198 | -1.887382959522 |
| C | 3.214473292957  | -1.412378226040 | -1.641073024337 |
| C | 3.251706133845  | -2.746646373808 | -1.233496087016 |
| H | 4.207648499644  | -3.232842279374 | -1.032046226827 |
| H | 4.140334049171  | -0.848408359948 | -1.764178753380 |
| H | 1.966437970743  | 0.252333964343  | -2.209880309232 |
| C | -0.505037681722 | -0.827694909903 | -2.030823989467 |
| C | -1.358783929022 | -1.422089321796 | -2.976075271159 |
| C | -2.567902201426 | -0.829019675911 | -3.339408306957 |
| C | -2.948846191940 | 0.381055866156  | -2.761993578428 |

|    |                 |                 |                 |
|----|-----------------|-----------------|-----------------|
| C  | -2.117003234625 | 0.971254387210  | -1.807738297049 |
| C  | -0.907717984518 | 0.377816412943  | -1.420002812019 |
| Bi | -0.082252961270 | 1.423849699327  | 0.430271309801  |
| Br | 2.366945756092  | 2.308694129981  | -0.222136685200 |
| C  | 0.617501017655  | -0.489750715882 | 1.446753353737  |
| C  | 1.954315363459  | -0.793535801360 | 1.704200312427  |
| C  | 2.297290202678  | -2.015195428584 | 2.290542460471  |
| C  | 1.303132021396  | -2.939819586353 | 2.615825420815  |
| C  | -0.036018425002 | -2.643050276232 | 2.362541629081  |
| C  | -0.389302477618 | -1.411035766853 | 1.794620631919  |
| C  | -1.804932176009 | -1.071321682104 | 1.510336502653  |
| C  | -2.364121892960 | 0.113310993459  | 2.029204592739  |
| C  | -3.664892258849 | 0.502155989905  | 1.689891155957  |
| C  | -4.427436214043 | -0.291606492074 | 0.834619789177  |
| C  | -3.891809794836 | -1.482913209455 | 0.334541340183  |
| C  | -2.596632775425 | -1.870922319771 | 0.671283490946  |
| H  | -2.170229545855 | -2.782564432130 | 0.251226045164  |
| H  | -4.482163953998 | -2.103500042421 | -0.341421990005 |
| H  | -5.438557893657 | 0.011309672925  | 0.560582611006  |
| H  | -4.082167073011 | 1.419902254826  | 2.106922723631  |
| H  | -1.790161044597 | 0.697875341192  | 2.753448079262  |
| H  | -0.819363815677 | -3.358836278848 | 2.621130159174  |
| H  | 1.571538123411  | -3.895843693352 | 3.068306705882  |
| H  | 3.346263194867  | -2.250200131226 | 2.480048088340  |
| H  | 2.737065897364  | -0.089384220191 | 1.412218130992  |
| H  | -2.443146175440 | 1.904933901046  | -1.336623392626 |
| H  | -3.886684706444 | 0.861179145132  | -3.045937284243 |
| H  | -3.204668692257 | -1.307955696737 | -4.085552641267 |
| H  | -1.044982159804 | -2.354972891565 | -3.448756638768 |
| H  | -0.094642754516 | -3.388752943112 | -1.201629503041 |



|   |                |                 |                 |
|---|----------------|-----------------|-----------------|
| H | 2.077474378856 | -4.495335578832 | -0.746879062166 |
|---|----------------|-----------------|-----------------|

## **R<sub>2</sub>BiI**

Structure 1.

|    |                 |                 |                 |
|----|-----------------|-----------------|-----------------|
| C  | -2.413168587520 | 3.409443335570  | -0.204502383246 |
| C  | -1.020580750985 | 3.396808752084  | -0.266709168371 |
| C  | -0.265685057260 | 2.765889490603  | 0.733813200998  |
| C  | -0.947835783297 | 2.178488671775  | 1.818684949578  |
| C  | -2.346049056016 | 2.186586051786  | 1.877125720575  |
| C  | -3.080117642888 | 2.797291735820  | 0.861313400075  |
| H  | -4.170721287917 | 2.801437146764  | 0.901102161030  |
| H  | -2.856814857237 | 1.723583844718  | 2.722721924993  |
| H  | -0.369362948198 | 1.770814387388  | 2.652592099257  |
| C  | 1.206812483714  | 2.633833657124  | 0.617480985481  |
| C  | 2.024163991792  | 3.756744709692  | 0.422939099073  |
| C  | 3.405052457124  | 3.606911377159  | 0.290197149358  |
| C  | 3.975525650105  | 2.332999207269  | 0.336344514601  |
| C  | 3.162447604825  | 1.208086377365  | 0.509835874077  |
| C  | 1.779522376763  | 1.345349636189  | 0.644724447888  |
| Bi | 0.310734657010  | -0.406451656408 | 0.825482071353  |
| C  | -0.540365509617 | 0.090990921365  | -1.227487629053 |
| C  | 0.220274351281  | 0.792414341238  | -2.167426094865 |
| C  | -0.354099052833 | 1.244670643088  | -3.356842903534 |
| C  | -1.707375749437 | 1.005450363012  | -3.608674654211 |
| C  | -2.468878748970 | 0.289110907426  | -2.687811687083 |
| C  | -1.891913378312 | -0.196110480913 | -1.500862891679 |
| C  | -2.707545242309 | -1.004347994617 | -0.563865648257 |
| C  | -3.970829432388 | -0.569955526826 | -0.131278914720 |
| C  | -4.717618422464 | -1.331493237060 | 0.767154017878  |
| C  | -4.218203058976 | -2.545691872102 | 1.247246252625  |

|   |                 |                 |                 |
|---|-----------------|-----------------|-----------------|
| C | -2.970844861404 | -2.998163660659 | 0.813336114131  |
| C | -2.222453943137 | -2.235928560349 | -0.086331434595 |
| H | -1.267331906503 | -2.618265611119 | -0.457337755388 |
| H | -2.580026212227 | -3.953871025435 | 1.165155211141  |
| H | -4.803846367838 | -3.140429885426 | 1.950143898366  |
| H | -5.693096784179 | -0.973717027863 | 1.100384765398  |
| H | -4.351097001693 | 0.388688630736  | -0.486546313041 |
| H | -3.518111471900 | 0.069862924084  | -2.896152481841 |
| H | -2.165987926256 | 1.363535240844  | -4.531944956403 |
| H | 0.253134929328  | 1.787723651006  | -4.083858275530 |
| H | 1.269525140899  | 1.013174955185  | -1.960510124059 |
| I | 2.167663366451  | -2.427145493184 | -0.097424384505 |
| H | 3.609918674168  | 0.210515796799  | 0.503002102053  |
| H | 5.055257864149  | 2.211459140089  | 0.227318262552  |
| H | 4.035676253377  | 4.486285644755  | 0.149282107925  |
| H | 1.571464032980  | 4.750445011223  | 0.391116502501  |
| H | -0.504301696542 | 3.833514129238  | -1.122533272973 |
| H | -2.983942095662 | 3.882622350568  | -1.005231859553 |

Structure 2.

|   |                |                 |                 |
|---|----------------|-----------------|-----------------|
| C | 4.995020666256 | -0.052378734179 | -0.344651795237 |
| C | 4.093277023935 | 0.035037259217  | 0.716139023175  |
| C | 2.952113338635 | 0.848283822327  | 0.623126876843  |
| C | 2.751452663113 | 1.590882500968  | -0.554466886250 |
| C | 3.654763024492 | 1.503329541666  | -1.615563472038 |
| C | 4.775558211277 | 0.676865723677  | -1.516477249805 |
| H | 5.480507237857 | 0.605703769458  | -2.346576893136 |
| H | 3.483662955637 | 2.091125583515  | -2.519007890696 |
| H | 1.895737079809 | 2.269426286872  | -0.620492841494 |
| C | 1.968357061606 | 0.914106143950  | 1.730540486095  |

|    |                 |                 |                 |
|----|-----------------|-----------------|-----------------|
| C  | 2.406902503047  | 1.186614568639  | 3.038036580290  |
| C  | 1.499368003931  | 1.261279256747  | 4.093013655530  |
| C  | 0.138584194375  | 1.055036506518  | 3.856598365587  |
| C  | -0.304786470912 | 0.765572633192  | 2.564041632194  |
| C  | 0.596338583355  | 0.689063954835  | 1.497677266736  |
| Bi | -0.092604348435 | 0.030168632251  | -0.576402459684 |
| C  | -2.001495439595 | -0.956749520328 | 0.216160465827  |
| C  | -3.198048296061 | -0.278352709152 | 0.461467388596  |
| C  | -4.348224206173 | -0.976099081733 | 0.842282324158  |
| C  | -4.312900233380 | -2.367287664822 | 0.962225248352  |
| C  | -3.129205373654 | -3.058139910835 | 0.705068638078  |
| C  | -1.964798751968 | -2.361610921401 | 0.343726033364  |
| C  | -0.702496168475 | -3.086203879236 | 0.059211367061  |
| C  | 0.504448009238  | -2.670080449323 | 0.657362144735  |
| C  | 1.720769948784  | -3.270331752191 | 0.315431431759  |
| C  | 1.747481869233  | -4.314052702175 | -0.608757818735 |
| C  | 0.551850441652  | -4.760624637066 | -1.180805524121 |
| C  | -0.660112601545 | -4.153314576445 | -0.852839245159 |
| H  | -1.585109920769 | -4.482080005291 | -1.330014071465 |
| H  | 0.566726749168  | -5.579940542165 | -1.901946911555 |
| H  | 2.693436816893  | -4.784016756505 | -0.880160637700 |
| H  | 2.642668401699  | -2.924562980498 | 0.784846218639  |
| H  | 0.477201892581  | -1.906562695626 | 1.439828762329  |
| H  | -3.093497355236 | -4.145311964881 | 0.807725072783  |
| H  | -5.209220078539 | -2.915808136336 | 1.256809598958  |
| H  | -5.274920056617 | -0.432583937381 | 1.036934615274  |
| H  | -3.239578801348 | 0.807118680757  | 0.335214235643  |
| I  | -1.318852910194 | 2.576450246936  | -1.206559443867 |
| H  | -1.367486700053 | 0.582349474466  | 2.391198124718  |
| H  | -0.577864394861 | 1.115513554216  | 4.677971321045  |

|   |                |                 |                 |
|---|----------------|-----------------|-----------------|
| H | 1.854357143804 | 1.488186552499  | 5.099692374160  |
| H | 3.469370457560 | 1.367828209615  | 3.215196869476  |
| H | 4.258762179089 | -0.545829625836 | 1.625977011518  |
| H | 5.871305650790 | -0.697608718919 | -0.259179991982 |

Structure 3.

|    |                 |                 |                 |
|----|-----------------|-----------------|-----------------|
| C  | 3.437403224457  | -1.547511158949 | -1.406517397710 |
| C  | 2.484985945210  | -1.400809158351 | -0.396411015200 |
| C  | 2.734558555710  | -0.578566334434 | 0.716303738555  |
| C  | 3.972485791992  | 0.078363234153  | 0.800131817639  |
| C  | 4.923703672776  | -0.067128815872 | -0.210176350363 |
| C  | 4.658467794597  | -0.876652861617 | -1.318653016442 |
| H  | 5.404431345710  | -0.987609102457 | -2.107482450973 |
| H  | 5.875477411822  | 0.461550221664  | -0.136728887153 |
| H  | 4.173646621837  | 0.726611793120  | 1.655043069677  |
| C  | 1.697146558352  | -0.414304081739 | 1.760743492819  |
| C  | 2.019681665258  | -0.640610827385 | 3.109599579328  |
| C  | 1.046984405702  | -0.527921875839 | 4.100831682327  |
| C  | -0.260399128994 | -0.175751927392 | 3.757050538544  |
| C  | -0.584931737438 | 0.069017733104  | 2.421429217899  |
| C  | 0.383347586796  | -0.039217797069 | 1.418554838167  |
| Bi | -0.110226299753 | 0.518700254241  | -0.738413055897 |
| C  | -2.301326670216 | -0.017064383858 | -0.349970050071 |
| C  | -3.305934502241 | 0.907897559602  | -0.058376742038 |
| C  | -4.581026537097 | 0.475259802883  | 0.321479410170  |
| C  | -4.854578903981 | -0.890229680319 | 0.419544894719  |
| C  | -3.861795657121 | -1.822751122467 | 0.116099297926  |
| C  | -2.589357187795 | -1.394314367891 | -0.290860894178 |
| C  | -1.543381262215 | -2.382717779743 | -0.656455973059 |
| C  | -1.108620527245 | -3.367319139747 | 0.246367570671  |

|   |                 |                 |                 |
|---|-----------------|-----------------|-----------------|
| C | -0.121722992428 | -4.281873516797 | -0.120790611105 |
| C | 0.445484715979  | -4.236606998666 | -1.398912979308 |
| C | 0.023853968945  | -3.265529598146 | -2.308010812856 |
| C | -0.958096067963 | -2.341641313910 | -1.937468427813 |
| H | -1.324145570365 | -1.610703414514 | -2.662194856356 |
| H | 0.452485086861  | -3.227654394108 | -3.310629213225 |
| H | 1.218160681555  | -4.953918007030 | -1.679570936613 |
| H | 0.216419687238  | -5.029593756995 | 0.598382962275  |
| H | -1.536581276722 | -3.391103412733 | 1.249500891922  |
| H | -4.074698171187 | -2.892816511158 | 0.171834600867  |
| H | -5.844374743110 | -1.232210517493 | 0.726176330964  |
| H | -5.357786715643 | 1.207439045372  | 0.550487771553  |
| H | -3.081944371337 | 1.977897614524  | -0.091282322574 |
| I | -0.422489223252 | 3.337859985633  | -0.173950986245 |
| H | -1.603283912240 | 0.366538588599  | 2.163622828154  |
| H | -1.026958458133 | -0.085143711250 | 4.528983504858  |
| H | 1.308287438847  | -0.721489681473 | 5.142763088990  |
| H | 3.037982942051  | -0.936671955846 | 3.370361938815  |
| H | 1.555844087144  | -1.973545142835 | -0.436664875883 |
| H | 3.226214727637  | -2.198338484813 | -2.257258211776 |

Structure 4.

|   |                 |                 |                 |
|---|-----------------|-----------------|-----------------|
| C | -2.821763862894 | -2.897179341448 | 1.002113499188  |
| C | -2.149353617705 | -2.270406566037 | -0.048810224426 |
| C | -2.733484841097 | -1.193539286424 | -0.739361338307 |
| C | -4.015833762224 | -0.769812268226 | -0.356886253617 |
| C | -4.687019990850 | -1.394390568406 | 0.694544370809  |
| C | -4.091367319721 | -2.456725027510 | 1.379698043327  |
| H | -4.616863488674 | -2.940598118720 | 2.204164516702  |

|    |                 |                 |                 |
|----|-----------------|-----------------|-----------------|
| H  | -5.676300817890 | -1.041824049813 | 0.989112777053  |
| H  | -4.470262216549 | 0.077098949432  | -0.873420510470 |
| C  | -1.995816221108 | -0.513304677226 | -1.831507674689 |
| C  | -2.573998077752 | -0.402337684169 | -3.106190610271 |
| C  | -1.884287154418 | 0.217204539937  | -4.147805373837 |
| C  | -0.610131786302 | 0.742514787198  | -3.924516522309 |
| C  | -0.037589709441 | 0.657165908306  | -2.653098918598 |
| C  | -0.720915183247 | 0.040917597788  | -1.600259531705 |
| Bi | 0.117779348266  | 0.027193897677  | 0.521015039664  |
| C  | 2.123974828261  | 0.937208241126  | -0.108413610426 |
| C  | 2.334150667879  | 2.303481290008  | -0.312657436047 |
| C  | 3.615975520749  | 2.793339657104  | -0.579356743250 |
| C  | 4.704020227370  | 1.918219012189  | -0.619461755098 |
| C  | 4.509597010476  | 0.554420205318  | -0.403901281130 |
| C  | 3.220408308636  | 0.052212199106  | -0.164167602905 |
| C  | 2.996740497402  | -1.397272484694 | 0.054090742592  |
| C  | 2.000604403680  | -2.076993965188 | -0.675360656464 |
| C  | 1.719474586054  | -3.423588880254 | -0.421024894869 |
| C  | 2.434663242966  | -4.115725100270 | 0.556609785107  |
| C  | 3.442425572955  | -3.457596882170 | 1.269070657743  |
| C  | 3.722394274564  | -2.114169424210 | 1.019624872678  |
| H  | 4.490241108248  | -1.597230113375 | 1.598242961672  |
| H  | 4.006386900219  | -3.993409164289 | 2.034569809870  |
| H  | 2.215904557307  | -5.165140022860 | 0.758673490914  |
| H  | 0.952616379102  | -3.934994491805 | -1.006192362493 |
| H  | 1.481474007168  | -1.556984546467 | -1.485599704770 |
| H  | 5.355580076172  | -0.135314479144 | -0.447566228571 |
| H  | 5.706605473622  | 2.298444566711  | -0.822431125330 |
| H  | 3.766778218018  | 3.861912644867  | -0.746100822228 |
| H  | 1.490371490478  | 2.995647791926  | -0.245335416035 |

|   |                 |                 |                 |
|---|-----------------|-----------------|-----------------|
| I | -1.169602062863 | 2.535860831716  | 1.165226369607  |
| H | 0.946364653912  | 1.097562659816  | -2.477474754829 |
| H | -0.064608669475 | 1.226238157425  | -4.736810337428 |
| H | -2.341119623361 | 0.285612635879  | -5.136744624700 |
| H | -3.564616715102 | -0.827282775711 | -3.279715658021 |
| H | -1.172265555703 | -2.640719966613 | -0.367364153679 |
| H | -2.353431677127 | -3.734166688502 | 1.522469189574  |

Optimized structures from crystal geometries

### **R<sub>2</sub>BiCH<sub>3</sub>**

|    |                 |                 |                |
|----|-----------------|-----------------|----------------|
| C  | 1.158713064007  | 2.176117831170  | 4.668741074662 |
| C  | -0.113578944621 | 2.208892411057  | 4.085529950155 |
| C  | 1.371947916557  | 2.880537327446  | 5.873721281666 |
| Bi | 2.927495947426  | 1.179798581239  | 3.618857701950 |
| C  | -1.165981311894 | 2.915688238072  | 4.674221143846 |
| C  | 0.312874511059  | 3.599384336920  | 6.453992766781 |
| C  | 2.701301326162  | 2.890876597093  | 6.534323911282 |
| C  | 1.705684008672  | 0.585239938675  | 1.768708155325 |
| C  | 2.520124197448  | -0.870813940646 | 4.551013561946 |
| C  | -0.949796647154 | 3.613856248896  | 5.863245727231 |
| C  | 3.370518210966  | 1.689402186639  | 6.826793108238 |
| C  | 3.325560075867  | 4.102048065115  | 6.875351131463 |
| C  | 1.321857016937  | -1.117830767857 | 5.230597760397 |
| C  | 3.437972515635  | -1.926109888925 | 4.378371430704 |
| C  | 4.632051505348  | 1.700714085772  | 7.425815036163 |
| C  | 4.586286400266  | 4.112878839285  | 7.472731444850 |
| C  | 1.018022543830  | -2.390674997930 | 5.721227770044 |
| C  | 3.117265143278  | -3.208300039877 | 4.856887493730 |

|   |                 |                 |                |
|---|-----------------|-----------------|----------------|
| C | 4.732752892966  | -1.712446489962 | 3.684191154899 |
| C | 5.246952684787  | 2.912235299855  | 7.746413848994 |
| C | 1.917949453249  | -3.440317379544 | 5.528853994412 |
| C | 5.628759304343  | -0.723524243018 | 4.126935821547 |
| C | 5.094009821251  | -2.490655270427 | 2.573175393812 |
| C | 6.842106728403  | -0.511292470025 | 3.470986910051 |
| C | 6.304288021591  | -2.274992698213 | 1.912931260236 |
| C | 7.181317357275  | -1.282957716060 | 2.358023153486 |
| H | 2.821109746750  | 5.042675651066  | 6.646352062282 |
| H | 5.128207020696  | 0.755760077929  | 7.654882509057 |
| H | 5.059348273769  | 5.064909713606  | 7.718985118479 |
| H | 6.232943631335  | 2.922195882959  | 8.212802975403 |
| H | 2.880326389385  | 0.737455973297  | 6.612814354139 |
| H | 0.482123324613  | 4.129759516251  | 7.393530537360 |
| H | -1.764955146854 | 4.166502260492  | 6.333401146242 |
| H | -2.150633191560 | 2.922905499505  | 4.202342840935 |
| H | -0.295681635299 | 1.678426497395  | 3.148848881165 |
| H | 1.386775525965  | 1.485969648227  | 1.229786184500 |
| H | 0.838481364744  | -0.009629526815 | 2.077360751246 |
| H | 2.356371460400  | -0.021683138748 | 1.125409115659 |
| H | 0.601124748377  | -0.307805212604 | 5.367978591666 |
| H | 0.077836911278  | -2.560910625749 | 6.249394978812 |
| H | 3.833832393645  | -4.020992481524 | 4.717636368638 |
| H | 1.690739944347  | -4.437873562912 | 5.908330257162 |
| H | 4.403173396594  | -3.257236813275 | 2.215796191100 |
| H | 6.560960430138  | -2.881401404659 | 1.042635404951 |
| H | 8.127409642640  | -1.115644504002 | 1.841256465221 |
| H | 7.526543573002  | 0.256966154514  | 3.835051705231 |
| H | 5.380668452382  | -0.136103689704 | 5.013941572883 |



**R<sub>2</sub>BiCl**

|    |                |                |                 |
|----|----------------|----------------|-----------------|
| C  | 8.495459010714 | 2.661717858951 | 8.052245545053  |
| C  | 8.010072398215 | 3.919024960642 | 7.679810210535  |
| C  | 8.892457172135 | 1.735167384406 | 7.085950209378  |
| Bi | 7.540535613694 | 5.488630897379 | 9.269554587731  |
| C  | 7.905310222077 | 4.247040025084 | 6.314341494114  |
| C  | 8.808694896760 | 2.065895492402 | 5.731026098826  |
| Cl | 9.901993472987 | 5.600666366540 | 10.121436019468 |
| C  | 6.961954253106 | 3.826296231058 | 10.723603772299 |
| C  | 8.322968925315 | 3.314996648736 | 5.348601031227  |
| C  | 7.361278034480 | 5.558477852028 | 5.893856026163  |
| C  | 7.833423671111 | 3.322250016663 | 11.690697057209 |
| C  | 5.705087064116 | 3.221983847007 | 10.537765659095 |
| C  | 8.065624137408 | 6.397546277432 | 5.015858898215  |
| C  | 6.119437215719 | 5.995183289785 | 6.388105380845  |
| C  | 7.475660975554 | 2.206056628489 | 12.453768478080 |
| C  | 5.361430566698 | 2.087247233220 | 11.286888746378 |
| C  | 4.754171275202 | 3.785165865692 | 9.547583869460  |
| C  | 7.553145180579 | 7.646124151358 | 4.663431548477  |
| C  | 5.606095525840 | 7.244211290302 | 6.034254450189  |
| C  | 6.244070257718 | 1.582914344109 | 12.242979801171 |
| C  | 4.251671471944 | 3.013012030669 | 8.487169680094  |
| C  | 4.329501244675 | 5.123073162749 | 9.663610203492  |
| C  | 6.324785716413 | 8.076166452870 | 5.174355665994  |
| C  | 3.348170287668 | 3.559989323880 | 7.576146161393  |
| C  | 3.417135663550 | 5.667360621824 | 8.755267485902  |
| C  | 2.924527824143 | 4.886290428112 | 7.709652196932  |
| H  | 8.814969362586 | 3.783428774042 | 11.824421467411 |
| H  | 9.034933059803 | 6.073769634390 | 4.633211816297  |
| H  | 5.529310733614 | 5.318881886641 | 7.011018334039  |

|   |                |                |                 |
|---|----------------|----------------|-----------------|
| H | 8.120598794911 | 8.293570671457 | 3.992440152531  |
| H | 4.636045412057 | 7.556232443395 | 6.423878159497  |
| H | 5.930105246152 | 9.054605902286 | 4.897902987882  |
| H | 8.583498556845 | 2.405818992654 | 9.110421475926  |
| H | 9.271275727477 | 0.758311301919 | 7.391589255918  |
| H | 9.116231051523 | 1.346509140260 | 4.970075998902  |
| H | 8.237141071928 | 3.570746365287 | 4.289995454848  |
| H | 4.593223510875 | 1.982897986542 | 8.373419352801  |
| H | 4.677920671933 | 5.716109039425 | 10.512740612160 |
| H | 2.975485687424 | 2.950606665233 | 6.751247392119  |
| H | 3.085531527708 | 6.699935305119 | 8.873724124844  |
| H | 2.215246961804 | 5.308313205436 | 6.995951369217  |
| H | 8.164840898643 | 1.817190419923 | 13.206011839255 |
| H | 4.389106445496 | 1.614460533886 | 11.131285336142 |
| H | 5.966003201397 | 0.704863050716 | 12.828304592491 |

### **R<sub>2</sub>BiBr**

|    |                 |                 |                 |
|----|-----------------|-----------------|-----------------|
| C  | -0.972303825116 | -2.021728107663 | 9.233738529519  |
| C  | -0.285764184705 | -2.386226974589 | 8.071718718779  |
| C  | -1.977633278214 | -2.871908408907 | 9.737509822507  |
| Bi | -0.628692956484 | 0.008474671915  | 10.213580124828 |
| C  | -0.586036767274 | -3.574958549034 | 7.403635565665  |
| C  | -2.289331090794 | -4.055301773950 | 9.047108739364  |
| C  | -2.716221268826 | -2.522397592631 | 10.974646599795 |
| C  | 0.331293560910  | 0.891864048961  | 8.335624387138  |
| Br | 1.694574223163  | -0.703231842393 | 11.343247050589 |
| C  | -1.596198793053 | -4.407296308067 | 7.890500161761  |
| C  | -2.016576521082 | -2.197836748204 | 12.151415112779 |
| C  | -4.119807725324 | -2.486429430160 | 10.997674292174 |

|   |                 |                 |                 |
|---|-----------------|-----------------|-----------------|
| C | 1.682702786646  | 0.743031124785  | 8.012427059577  |
| C | -0.486606217838 | 1.713096029240  | 7.531562538447  |
| C | -2.702697486139 | -1.829522243460 | 13.310480835935 |
| C | -4.804472384241 | -2.116476907949 | 12.155852796165 |
| C | 2.221789407235  | 1.383022568177  | 6.892395082422  |
| C | 0.067320337256  | 2.372531532900  | 6.422518280480  |
| C | -1.914400974887 | 1.894448704945  | 7.888815043144  |
| C | -4.098043834692 | -1.781636274518 | 13.314407703068 |
| C | 1.412383629218  | 2.198712326784  | 6.098304209033  |
| C | -2.477667692259 | 3.173501717832  | 8.027355528802  |
| C | -2.727366893339 | 0.774484277586  | 8.157548868268  |
| C | -3.797351020389 | 3.327730361568  | 8.451611410630  |
| C | -4.046269222446 | 0.931494579806  | 8.596420161204  |
| C | -4.583006541457 | 2.209553712063  | 8.749414056439  |
| H | 2.326517668668  | 0.130518951301  | 8.649352018236  |
| H | -0.925311379312 | -2.272585346058 | 12.163681828406 |
| H | -4.673085202502 | -2.733458546761 | 10.089042223158 |
| H | -2.141934558151 | -1.586292834418 | 14.214483268827 |
| H | -5.895715460205 | -2.082756947917 | 12.152856642117 |
| H | -4.634520273324 | -1.490304778586 | 14.218655408476 |
| H | -3.066811051511 | -4.713019298825 | 9.442281077536  |
| H | -1.840690653179 | -5.335949752445 | 7.372266182799  |
| H | 0.485752114032  | -1.727226700682 | 7.667512278223  |
| H | -0.037259900265 | -3.846189524299 | 6.500103671130  |
| H | -1.859411648364 | 4.050670571287  | 7.828100319071  |
| H | -2.338950091188 | -0.228084058396 | 7.958774272091  |
| H | -4.212778581073 | 4.330400407369  | 8.566896458670  |
| H | -4.652375955702 | 0.048745490189  | 8.806014987604  |
| H | -5.609928297700 | 2.337347619616  | 9.093673720457  |
| H | -0.571432651175 | 3.001719517581  | 5.798335818247  |

|   |                |                |                |
|---|----------------|----------------|----------------|
| H | 1.829332626443 | 2.700045276552 | 5.223309318717 |
| H | 3.276978028640 | 1.251045459457 | 6.645277827724 |

**R<sub>2</sub>BiI**

|    |                 |                 |                |
|----|-----------------|-----------------|----------------|
| C  | 1.223401754709  | 2.283655427261  | 2.175777442652 |
| C  | 1.168493380691  | 3.188778701365  | 1.113926343895 |
| H  | 1.940227195734  | 3.958190316516  | 1.017546443596 |
| C  | 0.160839663147  | 3.091536620177  | 0.148692496187 |
| C  | -0.796935784172 | 2.079714104811  | 0.238553437974 |
| C  | -0.758812325815 | 1.178024179571  | 1.302711048922 |
| C  | 0.235374046075  | 1.286463548289  | 2.285957124681 |
| C  | 0.250067271104  | 0.350360644514  | 3.438443627745 |
| C  | 0.340679628247  | -1.039484623027 | 3.255357229979 |
| C  | 0.340075512547  | -1.902882709515 | 4.350410669894 |
| C  | 0.245603861500  | -1.395355708920 | 5.650682576548 |
| C  | 0.159936606999  | -0.016879034700 | 5.849749164480 |
| C  | 0.166419602773  | 0.849913319064  | 4.752793567705 |
| C  | 3.827324371166  | 0.415849121205  | 2.542482402745 |
| C  | 3.626182032934  | 0.289704367222  | 1.164690582103 |
| C  | 4.271335575403  | -0.714029829104 | 0.439253828046 |
| C  | 5.136495745171  | -1.596633239356 | 1.091138650469 |
| C  | 5.340544259690  | -1.482134612378 | 2.465050390781 |
| C  | 4.675637241303  | -0.490995903383 | 3.207228123057 |
| C  | 4.862282175414  | -0.413304268816 | 4.674791285501 |
| C  | 3.740485882030  | -0.409662340084 | 5.522308856683 |
| C  | 3.888231604022  | -0.309033053282 | 6.906384692942 |
| C  | 5.163081692958  | -0.213951520927 | 7.467268607212 |
| C  | 6.286604219952  | -0.230636732691 | 6.635817762244 |
| C  | 6.139102659531  | -0.333027884539 | 5.252355616672 |
| Bi | 2.921121586250  | 2.158927407965  | 3.703284421950 |

|   |                 |                 |                 |
|---|-----------------|-----------------|-----------------|
| I | 4.583682762120  | 4.152800158041  | 2.430757666903  |
| H | 5.283751968866  | -0.132109237276 | 8.548866875689  |
| H | 2.746984842447  | -0.541830735294 | 5.089154430582  |
| H | 3.003055441023  | -0.316974253283 | 7.544548680449  |
| H | 7.285523153198  | -0.153288532211 | 7.068489434850  |
| H | 7.017187137109  | -0.322791823372 | 4.604042393786  |
| H | 2.975570961778  | 0.994437499622  | 0.642742722240  |
| H | 4.104892119252  | -0.800791048489 | -0.636455427591 |
| H | 5.647694695628  | -2.380445861707 | 0.529359590618  |
| H | 5.998156715856  | -2.183194229931 | 2.983660020323  |
| H | 0.130264025089  | 3.803427678441  | -0.678866456223 |
| H | -1.579921830152 | 1.995215082627  | -0.517518680936 |
| H | -1.515987365557 | 0.395318178383  | 1.389905664698  |
| H | 0.433701486430  | -1.434509782609 | 2.242236446638  |
| H | 0.045038032961  | 1.925560034862  | 4.903179349529  |
| H | 0.423235318175  | -2.979318576318 | 4.190202845615  |
| H | 0.244885702183  | -2.073859356821 | 6.504726162260  |
| H | 0.075655374231  | 0.388278508097  | 6.859431885905  |

Selected geometries from potential energy surface of aryl ring rotation of R<sub>2</sub>BiBr

R<sub>2</sub>BiBr (a)

1.

|   |                |                 |                 |
|---|----------------|-----------------|-----------------|
| C | 3.226693579177 | -1.613719890331 | -0.244012673916 |
| C | 1.917306751898 | -2.123559333902 | -0.208336359914 |
| C | 1.085132486437 | -2.067162643098 | -1.352594630876 |
| C | 1.613840966819 | -1.520360869203 | -2.541410291371 |
| C | 2.920844195801 | -1.016869276611 | -2.577292720354 |
| C | 3.728720578140 | -1.055325695492 | -1.428180791557 |
| H | 4.753006683538 | -0.654147246593 | -1.458112057843 |
| H | 3.306555628189 | -0.572261454711 | -3.507116020251 |

|    |                 |                 |                 |
|----|-----------------|-----------------|-----------------|
| H  | 0.969529116440  | -1.449836089997 | -3.429987225953 |
| C  | -0.338943342751 | -2.492017831779 | -1.275140405296 |
| C  | -0.871747739607 | -3.423053585432 | -2.192166895920 |
| C  | -2.222533847393 | -3.794551257717 | -2.124960255819 |
| C  | -3.059466151461 | -3.227872562534 | -1.150806196737 |
| C  | -2.545365559757 | -2.281439884279 | -0.246956178375 |
| C  | -1.192360208049 | -1.912793332006 | -0.302500191689 |
| Bi | -0.310218510542 | -0.244440814034 | 1.028715739552  |
| Br | -2.701019044413 | 0.794138320284  | 1.674989780255  |
| C  | 0.026064225538  | 1.064203349573  | -0.831749682162 |
| C  | -0.769858902489 | 0.876330053003  | -1.974119169394 |
| C  | -0.447616473085 | 1.518696988929  | -3.179766909399 |
| C  | 0.688700987972  | 2.341093723135  | -3.249904250503 |
| C  | 1.476019874441  | 2.545626968863  | -2.109647211015 |
| C  | 1.146752428022  | 1.928920154678  | -0.880024039269 |
| C  | 1.965177820498  | 2.210004480034  | 0.329935712913  |
| C  | 3.372896747235  | 2.103777084220  | 0.302029855894  |
| C  | 4.133548846863  | 2.350394150080  | 1.453690817286  |
| C  | 3.502150359822  | 2.713513497767  | 2.654841874275  |
| C  | 2.104814518458  | 2.840150336947  | 2.693238150432  |
| C  | 1.342668648445  | 2.595403504567  | 1.540644915229  |
| H  | 0.249895730508  | 2.737858947758  | 1.564050929131  |
| H  | 1.601735442302  | 3.143755092354  | 3.623867658304  |
| H  | 4.100253511407  | 2.904598411681  | 3.558681126911  |
| H  | 5.229366547935  | 2.251440297107  | 1.415795142058  |
| H  | 3.865693701506  | 1.796903090256  | -0.632325650891 |
| H  | 2.346214116885  | 3.219139785643  | -2.152829522297 |
| H  | 0.954024367161  | 2.839932425394  | -4.194661169938 |
| H  | -1.080339826480 | 1.368681099727  | -4.068335954018 |
| H  | -1.641732926712 | 0.204881588134  | -1.931372916582 |

|   |                 |                 |                 |
|---|-----------------|-----------------|-----------------|
| H | -3.213436531126 | -1.801669102476 | 0.487388061346  |
| H | -4.121825609336 | -3.512960230241 | -1.100663473216 |
| H | -2.623713511430 | -4.530589009004 | -2.838362599714 |
| H | -0.210556217845 | -3.867657420677 | -2.952633551825 |
| H | 1.546327413370  | -2.621347501919 | 0.702360805334  |
| H | 3.858013127668  | -1.663448318098 | 0.655867427174  |

2.

|    |                 |                 |                 |
|----|-----------------|-----------------|-----------------|
| C  | 3.402082908621  | -2.816127699088 | -0.105573713984 |
| C  | 2.039145444712  | -3.114733807102 | -0.253685722458 |
| C  | 1.231148397717  | -2.369020522807 | -1.141518293817 |
| C  | 1.826782867744  | -1.326991235343 | -1.889255349861 |
| C  | 3.190122883554  | -1.028513508569 | -1.735531077260 |
| C  | 3.979112023335  | -1.768368358358 | -0.841617741755 |
| H  | 5.045845191211  | -1.528333609605 | -0.716867897270 |
| H  | 3.634666683070  | -0.209133102967 | -2.320465655179 |
| H  | 1.208562397501  | -0.743001297153 | -2.586359385283 |
| C  | -0.240272530959 | -2.631757094287 | -1.240730790309 |
| C  | -0.755068791323 | -3.669632915579 | -2.042967859433 |
| C  | -2.139963501528 | -3.891402743784 | -2.108350567265 |
| C  | -3.019626745593 | -3.083954046964 | -1.370046215154 |
| C  | -2.515447472170 | -2.050278253500 | -0.561061310786 |
| C  | -1.132178588578 | -1.822290021898 | -0.498390806623 |
| Bi | -0.125903812340 | -0.207787936484 | 0.790467985652  |
| Br | -2.414837905877 | 0.727309336107  | 1.823366119322  |
| C  | -0.083856869100 | 1.268239430895  | -0.974609887178 |
| C  | -0.949066927216 | 1.091640156523  | -2.068051551592 |
| C  | -0.797143641264 | 1.866348424086  | -3.229250778691 |
| C  | 0.237021739113  | 2.813602851425  | -3.305751199563 |
| C  | 1.096642113034  | 3.001424156304  | -2.215238136969 |

|   |                 |                 |                 |
|---|-----------------|-----------------|-----------------|
| C | 0.940165099058  | 2.246028685421  | -1.030312356486 |
| C | 1.847005996114  | 2.483417513162  | 0.125014012765  |
| C | 3.249741146621  | 2.466663778983  | -0.034629138190 |
| C | 4.098368291145  | 2.658978334732  | 1.064968343066  |
| C | 3.560265308699  | 2.877924432245  | 2.343650786227  |
| C | 2.167403233094  | 2.911801129092  | 2.514494010599  |
| C | 1.316808796044  | 2.719294098083  | 1.415259653104  |
| H | 0.224250158299  | 2.780178042764  | 1.547713908590  |
| H | 1.736007534687  | 3.098650565342  | 3.509629329970  |
| H | 4.227266437657  | 3.026561418972  | 3.206278776925  |
| H | 5.189728905943  | 2.630258436186  | 0.923988018299  |
| H | 3.673103682532  | 2.276071967642  | -1.032658879879 |
| H | 1.890097752879  | 3.763735381722  | -2.262066047569 |
| H | 0.367727139671  | 3.418394671131  | -4.216135452528 |
| H | -1.481933761599 | 1.722456599230  | -4.079258350417 |
| H | -1.739150265351 | 0.325505624271  | -2.025003909389 |
| H | -3.200353135629 | -1.417011750610 | 0.027395913989  |
| H | -4.105321196707 | -3.260651965704 | -1.420962258190 |
| H | -2.533845399435 | -4.702186735221 | -2.740195707900 |
| H | -0.061897853997 | -4.300947117152 | -2.620766538864 |
| H | 1.581540823968  | -3.928296290633 | 0.330008278557  |
| H | 4.016469442641  | -3.401705021510 | 0.595206442777  |

3.

|   |                |                 |                 |
|---|----------------|-----------------|-----------------|
| C | 3.436093134290 | -3.697833031584 | -1.801849853898 |
| C | 2.044467901923 | -3.756018968264 | -1.662529899409 |
| C | 1.281709637214 | -2.650556200750 | -1.201329967024 |
| C | 2.028045603781 | -1.485357715231 | -0.900186623321 |
| C | 3.421874533920 | -1.416357897798 | -1.026327723575 |
| C | 4.143387402216 | -2.531572098577 | -1.470548838678 |



|    |                 |                 |                 |
|----|-----------------|-----------------|-----------------|
| H  | 5.238028006322  | -2.489608593615 | -1.572290063921 |
| H  | 3.934203284942  | -0.471251211998 | -0.789905270523 |
| H  | 1.521189001506  | -0.530560884871 | -0.701827955558 |
| C  | -0.186978137246 | -2.775440642976 | -0.931122298107 |
| C  | -0.841328217670 | -3.981511097279 | -1.296424970894 |
| C  | -2.230303726660 | -4.136227417956 | -1.250467601347 |
| C  | -3.036834702757 | -3.064516301134 | -0.850259398981 |
| C  | -2.422842061923 | -1.868829665378 | -0.448772747456 |
| C  | -1.025128992078 | -1.705814016662 | -0.479219615402 |
| Bi | -0.252356533896 | 0.103922350303  | 0.751605030928  |
| Br | -2.638463970529 | 1.157757444770  | 1.385992454930  |
| C  | 0.035706663699  | 1.426566799736  | -1.111559566242 |
| C  | -0.629781867868 | 1.102911798250  | -2.306297185632 |
| C  | -0.364711284184 | 1.819667897686  | -3.483963367246 |
| C  | 0.584613707257  | 2.853788916052  | -3.473136449937 |
| C  | 1.255152488119  | 3.177353681786  | -2.286188906343 |
| C  | 0.983286496867  | 2.479574326430  | -1.087226712429 |
| C  | 1.701500267887  | 2.847709968944  | 0.163362579814  |
| C  | 3.112461686813  | 2.900050846061  | 0.198333756373  |
| C  | 3.788213924100  | 3.214392786242  | 1.386566414006  |
| C  | 3.065567707012  | 3.487995984560  | 2.559407066092  |
| C  | 1.662507188155  | 3.453763536039  | 2.534867242388  |
| C  | 0.984230165317  | 3.139509379446  | 1.347144153759  |
| H  | -0.117676624569 | 3.146950919607  | 1.324410486049  |
| H  | 1.087221393497  | 3.682479126908  | 3.444848265149  |
| H  | 3.596807865398  | 3.732373613271  | 3.491669855584  |
| H  | 4.888643038797  | 3.239752043291  | 1.398778054425  |
| H  | 3.679335863605  | 2.670858406834  | -0.717583436273 |
| H  | 1.987676170631  | 3.999468912445  | -2.271056112005 |
| H  | 0.801644674082  | 3.415668531568  | -4.394407061978 |

|   |                 |                 |                 |
|---|-----------------|-----------------|-----------------|
| H | -0.893981486405 | 1.561761449226  | -4.414183412433 |
| H | -1.352001852459 | 0.271517844986  | -2.324155644707 |
| H | -3.053657082258 | -1.042644813635 | -0.081016930609 |
| H | -4.133287530343 | -3.158404193198 | -0.826844537798 |
| H | -2.678995860074 | -5.097422836904 | -1.543987206629 |
| H | -0.249859170071 | -4.835496471314 | -1.651449543046 |
| H | 1.550086229479  | -4.702878730802 | -1.914185389614 |
| H | 3.975749064158  | -4.585133774515 | -2.166552068482 |

Selected geometries from potential energy surface of aryl ring rotation of R<sub>2</sub>BiBr

R<sub>2</sub>BiBr (b)

1.

|    |                 |                 |                 |
|----|-----------------|-----------------|-----------------|
| C  | 3.226430066521  | -1.612599342530 | -0.243104553330 |
| C  | 1.916746323183  | -2.121665682098 | -0.207482291845 |
| C  | 1.085275631585  | -2.066371148845 | -1.352291046591 |
| C  | 1.615113254828  | -1.521876912169 | -2.541676215238 |
| C  | 2.922411022615  | -1.019150581446 | -2.577493797736 |
| C  | 3.729514481587  | -1.056269348916 | -1.427794140553 |
| H  | 4.754061103238  | -0.655749850696 | -1.457664424249 |
| H  | 3.308965091476  | -0.576237132945 | -3.507773813497 |
| H  | 0.971427711353  | -1.452407687048 | -3.430785512574 |
| C  | -0.338865318152 | -2.491027187228 | -1.275382369443 |
| C  | -0.871388029505 | -3.422012020028 | -2.192636921255 |
| C  | -2.222031915923 | -3.794001643549 | -2.125503488848 |
| C  | -3.059123890235 | -3.227989233559 | -1.151103977009 |
| C  | -2.545340375090 | -2.281657530673 | -0.246969714602 |
| C  | -1.192472203617 | -1.912493685024 | -0.302475815542 |
| Bi | -0.311374178748 | -0.243344768223 | 1.028727361159  |
| Br | -2.702729227503 | 0.794565354583  | 1.673851796363  |
| C  | 0.025490059852  | 1.064668574578  | -0.832069640051 |

|   |                 |                 |                 |
|---|-----------------|-----------------|-----------------|
| C | -0.770138257465 | 0.876767227810  | -1.974627756684 |
| C | -0.447291207050 | 1.518817662216  | -3.180286989743 |
| C | 0.689284122002  | 2.340898102689  | -3.250134945515 |
| C | 1.476213307587  | 2.545509778813  | -2.109627786476 |
| C | 1.146261283727  | 1.929288957295  | -0.879945520853 |
| C | 1.964623497562  | 2.209638121328  | 0.330166745857  |
| C | 3.372160544076  | 2.100860043484  | 0.303158260855  |
| C | 4.132650094830  | 2.347509463992  | 1.454916203272  |
| C | 3.501307702646  | 2.713369052772  | 2.655266712806  |
| C | 2.104189356569  | 2.842710842492  | 2.692716568588  |
| C | 1.342225096395  | 2.597954005982  | 1.540013501685  |
| H | 0.249691307967  | 2.742320444726  | 1.562711508953  |
| H | 1.601159131663  | 3.148435160644  | 3.622675591884  |
| H | 4.099277770769  | 2.904472383723  | 3.559186123907  |
| H | 5.228299459735  | 2.246482499579  | 1.417700566430  |
| H | 3.864955246279  | 1.791922404037  | -0.630518893516 |
| H | 2.346659058169  | 3.218704540007  | -2.152750530628 |
| H | 0.955204901027  | 2.839355151710  | -4.194923574397 |
| H | -1.079719841799 | 1.368830049416  | -4.069067577909 |
| H | -1.642257805178 | 0.205641974388  | -1.931981360219 |
| H | -3.213530554498 | -1.802304071695 | 0.487531131098  |
| H | -4.121369563388 | -3.513505187530 | -1.101016597367 |
| H | -2.622956811453 | -4.529981944483 | -2.839104856779 |
| H | -0.210031518533 | -3.866264164081 | -2.953163841918 |
| H | 1.545038429916  | -2.618101127206 | 0.703654164581  |
| H | 3.857199640981  | -1.661351546294 | 0.657210716929  |

2.

|   |                |                 |                |
|---|----------------|-----------------|----------------|
| C | 2.900950017639 | -1.388419632664 | 0.544868143276 |
| C | 1.612815970302 | -1.902197668358 | 0.318011870251 |

|    |                 |                 |                 |
|----|-----------------|-----------------|-----------------|
| C  | 1.046255345270  | -1.897332210056 | -0.980343841229 |
| C  | 1.820901985166  | -1.396195793187 | -2.047961881284 |
| C  | 3.107757689755  | -0.890774261242 | -1.820069199236 |
| C  | 3.649421798280  | -0.876603902852 | -0.523797791640 |
| H  | 4.650043348786  | -0.457099890895 | -0.344605888089 |
| H  | 3.686407407141  | -0.480006815736 | -2.661378481298 |
| H  | 1.382300620099  | -1.360879384654 | -3.056324174675 |
| C  | -0.349288182586 | -2.360094534501 | -1.197918895519 |
| C  | -0.645494461620 | -3.310629519636 | -2.199032961015 |
| C  | -1.962788044990 | -3.744441929885 | -2.404784848110 |
| C  | -3.003746149021 | -3.225581204972 | -1.619259944028 |
| C  | -2.726324245337 | -2.260797197236 | -0.635287807280 |
| C  | -1.409023088072 | -1.826037632430 | -0.424000590745 |
| Bi | -0.922745934012 | -0.116010921815 | 1.048334309958  |
| Br | -3.448607802992 | 0.784560130383  | 1.097882573426  |
| C  | -0.241616025006 | 1.214231943514  | -0.738373595700 |
| C  | -1.169328293533 | 1.130321954132  | -1.794096856254 |
| C  | -0.872224014529 | 1.600974345631  | -3.079547527937 |
| C  | 0.392089610356  | 2.155329877906  | -3.316588095557 |
| C  | 1.309106097150  | 2.264849657486  | -2.268261789581 |
| C  | 1.040901638985  | 1.804220205682  | -0.950786165597 |
| C  | 2.053882349007  | 2.096765198248  | 0.115599932429  |
| C  | 3.341284173616  | 2.594503389810  | -0.214294194020 |
| C  | 4.346168963874  | 2.765994362439  | 0.745418304678  |
| C  | 4.116273582993  | 2.433671436291  | 2.089042392123  |
| C  | 2.852191784253  | 1.947310400872  | 2.449317687940  |
| C  | 1.854406097460  | 1.783373176082  | 1.479830594847  |
| H  | 0.869576090053  | 1.453714901452  | 1.833034619067  |
| H  | 2.630479642987  | 1.696801563156  | 3.497950216193  |
| H  | 4.906765851756  | 2.560966322267  | 2.843677038731  |

|   |                 |                 |                 |
|---|-----------------|-----------------|-----------------|
| H | 5.326949810743  | 3.156243466176  | 0.433012678153  |
| H | 3.590749150129  | 2.838739698130  | -1.254532905793 |
| H | 2.268535633397  | 2.750223528208  | -2.488162660422 |
| H | 0.663881146155  | 2.525341730581  | -4.316981778493 |
| H | -1.618941714627 | 1.524456173741  | -3.884416442898 |
| H | -2.156704653156 | 0.676265525634  | -1.613338597787 |
| H | -3.550525434193 | -1.818268679291 | -0.051853013716 |
| H | -4.039774601221 | -3.561934820779 | -1.779844665752 |
| H | -2.176689077010 | -4.494288194193 | -3.181669272739 |
| H | 0.175745906788  | -3.723784176717 | -2.805498476037 |
| H | 1.056903606472  | -2.371863716443 | 1.146110066762  |
| H | 3.322290403292  | -1.393256900278 | 1.561050914596  |

3.

|    |                 |                 |                 |
|----|-----------------|-----------------|-----------------|
| C  | 3.035713934643  | -2.171469585407 | 0.425731721219  |
| C  | 1.641694477039  | -2.333674704803 | 0.358061425678  |
| C  | 0.965592268881  | -2.284421469044 | -0.884641464566 |
| C  | 1.725327874358  | -2.074120345117 | -2.056263505113 |
| C  | 3.115546518522  | -1.911870112933 | -1.987510052873 |
| C  | 3.775765317814  | -1.960061221886 | -0.747301246400 |
| H  | 4.867847138804  | -1.833413311459 | -0.697222549379 |
| H  | 3.689480421747  | -1.735193960428 | -2.909785765808 |
| H  | 1.206362085392  | -2.007322990074 | -3.023998553641 |
| C  | -0.516417580113 | -2.416504054311 | -0.942761620996 |
| C  | -1.118366961538 | -3.406831366192 | -1.748463878694 |
| C  | -2.514650817471 | -3.528539677978 | -1.801668979604 |
| C  | -3.324304706258 | -2.654038991735 | -1.060052549982 |
| C  | -2.736013841635 | -1.647484463349 | -0.274025231034 |
| C  | -1.339541862384 | -1.525659400757 | -0.210790396039 |
| Bi | -0.294517805516 | 0.243816923185  | 0.837504434878  |

|    |                 |                 |                 |
|----|-----------------|-----------------|-----------------|
| Br | -2.553360781806 | 1.656940139428  | 1.146206007115  |
| C  | 0.226004791854  | 1.127250037291  | -1.216677385475 |
| C  | -0.503801110452 | 0.806450551776  | -2.373844080998 |
| C  | -0.151198532025 | 1.373053276517  | -3.609099151253 |
| C  | 0.930387449346  | 2.265384370387  | -3.688053337010 |
| C  | 1.654609676971  | 2.595773924215  | -2.533275267302 |
| C  | 1.309969545480  | 2.031196493235  | -1.287019404124 |
| C  | 2.075696668686  | 2.380262502818  | -0.050913480860 |
| C  | 1.730569624487  | 3.515439004795  | 0.712627788720  |
| C  | 2.411944372961  | 3.804483937051  | 1.905303052512  |
| C  | 3.446734377635  | 2.965605499790  | 2.349212924986  |
| C  | 3.799121356241  | 1.835706450692  | 1.594067566631  |
| C  | 3.119420527581  | 1.544536955635  | 0.401234537477  |
| H  | 3.385337796840  | 0.653854594664  | -0.187431432021 |
| H  | 4.608167464586  | 1.172075133161  | 1.936634185460  |
| H  | 3.977038366119  | 3.191926885156  | 3.286711455022  |
| H  | 2.127170931039  | 4.688842548973  | 2.495483300903  |
| H  | 0.907340786760  | 4.161532819736  | 0.371644655306  |
| H  | 2.501127133071  | 3.297793080544  | -2.589028373563 |
| H  | 1.210132992607  | 2.710628281988  | -4.655189860504 |
| H  | -0.726412248656 | 1.119371739777  | -4.513139991902 |
| H  | -1.354350239214 | 0.109491050177  | -2.313599743827 |
| H  | -3.371623640314 | -0.929022368839 | 0.269815910837  |
| H  | -4.420795341367 | -2.744901381769 | -1.103092202899 |
| H  | -2.972188747541 | -4.311598513979 | -2.425430492727 |
| H  | -0.478360510158 | -4.095283189611 | -2.322542646995 |
| H  | 1.068292646253  | -2.554767057909 | 1.272541766444  |
| H  | 3.544722180729  | -2.222878033412 | 1.400170912401  |

### Coordinates of transition state geometries of R<sub>2</sub>BiBr conformation

|    |                 |                 |                 |
|----|-----------------|-----------------|-----------------|
| C  | 2.538206325873  | -3.296217719264 | -0.991856776765 |
| C  | 1.148802128547  | -3.373896537314 | -0.951614417587 |
| C  | 0.353078110523  | -2.414792943694 | -0.284266126813 |
| C  | 1.073690820489  | -1.375586494558 | 0.330248052109  |
| C  | 2.463643367647  | -1.284336076092 | 0.304815204605  |
| C  | 3.213956016893  | -2.250269059058 | -0.361705768559 |
| H  | 4.302514489626  | -2.189372072119 | -0.390711125990 |
| H  | 2.949387285161  | -0.446836010898 | 0.807681969702  |
| H  | 0.575758958988  | -0.561501570818 | 0.857824658047  |
| C  | -1.137837445441 | -2.528693937138 | -0.250551655780 |
| C  | -1.734142130188 | -3.631532879700 | -0.900788438630 |
| C  | -3.108636840005 | -3.839831672022 | -0.932840547654 |
| C  | -3.956865347095 | -2.936583501646 | -0.299670820877 |
| C  | -3.398751490948 | -1.837525853167 | 0.352579484089  |
| C  | -2.016656671113 | -1.606183264303 | 0.385988679404  |
| Bi | -1.437967886272 | 0.274384316811  | 1.577454519086  |
| Br | -3.876670182761 | 1.313631317729  | 1.877452035303  |
| C  | -0.996494466365 | 1.406402886138  | -0.347725677574 |
| C  | -1.717491202245 | 1.121076006204  | -1.510448290567 |
| C  | -1.393527508942 | 1.742012472675  | -2.718271759388 |
| C  | -0.329840274214 | 2.645860804594  | -2.770650655423 |
| C  | 0.396226485209  | 2.934576513757  | -1.616571365557 |
| C  | 0.062654027910  | 2.332244432921  | -0.391744107695 |
| C  | 0.839063485824  | 2.655318067610  | 0.829612211743  |
| C  | 2.237340506871  | 2.526856533491  | 0.851865988238  |
| C  | 2.958874758935  | 2.792415688086  | 2.016396211797  |
| C  | 2.296449925232  | 3.198663778671  | 3.177882639747  |
| C  | 0.908290075236  | 3.348341649336  | 3.164939075225  |

|   |                 |                 |                 |
|---|-----------------|-----------------|-----------------|
| C | 0.185463922263  | 3.080466444821  | 2.000721420888  |
| H | -0.896116383083 | 3.240486766510  | 1.979395459813  |
| H | 0.384434809464  | 3.685107925309  | 4.060885139444  |
| H | 2.861860303709  | 3.405041217191  | 4.087735464698  |
| H | 4.044352029548  | 2.678222051424  | 2.018930634650  |
| H | 2.752886063302  | 2.195850069836  | -0.051809703016 |
| H | 1.218205487537  | 3.652815208681  | -1.650176161251 |
| H | -0.067657014455 | 3.131153159183  | -3.712305469769 |
| H | -1.966559654372 | 1.514069637111  | -3.618813320033 |
| H | -2.532153434363 | 0.394474009163  | -1.480486083052 |
| H | -4.070129642676 | -1.127636485986 | 0.841586911640  |
| H | -5.038889079401 | -3.078725863669 | -0.309055977635 |
| H | -3.508820463166 | -4.711401837753 | -1.453566016853 |
| H | -1.110209004838 | -4.364992406452 | -1.407319750280 |
| H | 0.683420184337  | -4.213783446904 | -1.462367772797 |
| H | 3.097472052817  | -4.067224824696 | -1.524534970681 |

#### References:

1. Flack, H., *Acta Cryst.* **1983**, *39* (A6), 876-881.
2. Adams, E. A.; Kolis, J. W.; Pennington, W. T., *Acta Cryst.* **1990**, *C46* (5), 917-919.
3. Sobolev, A. N.; Romm, I. P.; Belsky, V. K.; Guryanova, E. N., *J. Organomet. Chem.* **1979**, *179* (2), 153-157.
4. Sharma, P.; Cabrera, A.; Rosas, N.; Le Lagadec, R.; Hernandez, S.; Valdes, J.; Arias Jose, L.; Ambrose, C. V., *Main Group Met. Chem.* **1998**, *21* (6), 303.
5. Ateş, M. B., H. J.; Ebert, K. H.; Kaller, R., *Z. Naturforsch.* **1992**, *47b*, 503-508.
